1 Title: Time-resolved proteomic profile of *Amblyomma americanum* tick saliva during feeding

2 Running Title: Proteins in tick saliva every 24 h during feeding

3

4 Tae Kwon Kim<sup>a\*</sup>; Lucas Tirloni<sup>a,b\*</sup>; Antônio F. M. Pinto<sup>c,d</sup>; Jolene K. Diedrich<sup>d,f</sup>; James J.

5 Moresco<sup>d,f</sup>; John R. Yates III<sup>d</sup>; Itabajara da Silva Vaz Jr<sup>b,e</sup>; and Albert Mulenga<sup>a,#</sup>

6

7 <sup>a</sup> Department of Veterinary Pathobiology, College of Veterinary Medicine, Texas A&M  
8 University, College Station, TX, USA.

9 <sup>b</sup> Centro de Biotecnologia, Universidade Federal do Rio Grande do Sul, Porto Alegre, RS, Brazil.

10 <sup>c</sup> Foundation Peptide Biology Lab, Salk Institute for Biological Studies, La Jolla, CA, USA

11 <sup>d</sup> Department of Molecular Medicine, The Scripps Research Institute, La Jolla, CA, USA.

12 <sup>e</sup> Faculdade de Veterinária, Universidade Federal do Rio Grande do Sul, Porto Alegre, RS,  
13 Brazil.

14 <sup>f</sup> Mass Spectrometry Core, Salk Institute for Biological Studies, La Jolla, CA, USA.

15

16

17 \*TKK and LT are co-first authors

18

19 # Correspondence author

20 Phone: 979 458 4300

21 Email: [amulenga@cvm.tamu.edu](mailto:amulenga@cvm.tamu.edu)

22

23 **Abstract**

24 *Amblyomma americanum* ticks transmit more than a third of human tick-borne disease  
25 (TBD) agents in the United States. Tick saliva proteins are critical to success of ticks as vectors  
26 of TBD agents, and thus might serve as targets in tick antigen-based vaccines to prevent TBD  
27 infections. We describe a systems biology approach to identify, by LC-MS/MS, saliva proteins  
28 (tick=1182, rabbit=335) that *A. americanum* ticks likely inject into the host every 24 h during the  
29 first 8 days of feeding, and towards the end of feeding using two different sample preparation  
30 approaches (in-gel and in-solution). The in-gel approach determined molecular identification of  
31 predominant protein bands in tick saliva, and the in-solution added depth to discovery of  
32 proteins. Searching against entries in GenBank grouped tick and rabbit proteins in this study into  
33 27 and 25 functional categories. Aside from housekeeping-like proteins, majority of tick saliva  
34 proteins belong to the tick-specific (no homology to non-tick organisms: 32%), protease  
35 inhibitors (13%), proteases (8%), glycine-rich proteins (6%) and lipocalins (4%) categories.  
36 Global secretion dynamics analysis suggests that majority (74%) of proteins in this study are  
37 associated with regulating initial tick feeding functions and transmission of pathogens as they are  
38 secreted within 24-48 h of tick attachment. Comparative analysis of the *A. americanum* tick  
39 saliva proteome to five other tick saliva proteomes identified 284 conserved tick saliva proteins:  
40 we speculate that these regulate critical tick feeding functions and might serve as tick vaccine  
41 antigens. We discuss our findings in the context of understanding *A. americanum* tick feeding  
42 physiology as a means through which we can find effective targets for a vaccine against tick  
43 feeding.

44

45 *Keywords: ticks, saliva, proteome, tick-feeding*

46 **Author Summary**

47           The lone star tick, *Amblyomma americanum*, is a medically important species in US that  
48 transmits 5 of the 16 reported tick-borne disease agents. Most recently, bites of this tick were  
49 associated with red meat allergies in humans. Vaccination of animals against tick feeding has  
50 been shown to be a sustainable and effective alternative to current acaricide based tick control  
51 method which has several limitations. The pre-requisite to tick vaccine development is to  
52 understand the molecular basis of tick feeding physiology. Toward this goal, this study has  
53 identified proteins that *A. americanum* ticks inject into the host at different phases of its feeding  
54 cycle. This data set has identified proteins that *A. americanum* inject into the host within 24-48 h  
55 of feeding before it starts to transmit pathogens. Of high importance, we identified 284 proteins  
56 that are present in saliva of other tick species, which we suspect regulate important role(s) in tick  
57 feeding success and might represent rich source target antigens for a tick vaccine. Overall, this  
58 study provides a foundation to understand the molecular mechanisms regulating tick feeding  
59 physiology.

60

## 61 **Introduction**

62 Ticks and tick-borne diseases (TBDs) have been on the rise and have greatly impacted  
63 human and veterinary medicine. Ticks have gained the attention in public health policy with a  
64 recent publication that advocated for One Health solutions listing 17 human TBDs among  
65 sources of human health concerns (1). Moreover, the dramatic rise related to ticks and TBDs  
66 have caught the attention of United States (US) lawmakers, as shown in the 21<sup>st</sup> Century Cures  
67 Act of 2016, which created the TBD Working Group. Under the Cures Act, the TBD Working  
68 Group was tasked with evaluating the impact of TBDs and required research to find solutions  
69 (<https://www.hhs.gov/ash/advisory-committees/tickbornedisease/index.html>). Likewise, six of  
70 the 23 human vector-borne diseases that are listed by the World Health Organization are tick  
71 borne that include Crimean-Congo haemorrhagic fever, Lyme disease, relapsing fever, rickettsial  
72 diseases (spotted fever and Q fever), tick-borne encephalitis, and tularemia  
73 (<http://www.who.int/news-room/fact-sheets/detail/vector-borne-diseases>). In the US,  
74 *Amblyomma americanum*, the lone star tick is among one of the tick species of medical and  
75 veterinary health significance.

76 *A. americanum* is a geographically expanding tick species (2) that is involved in  
77 transmission of multiple human and animal disease agents. In public health, *A. americanum* is  
78 the principal vector for *Ehrlichia chaffensis*, the causative agent of human monocytic ehrlichiosis  
79 (3), and *E. ewingii*, which also causes ehrlichiosis, referred to as human granulocytic ehrlichiosis  
80 (4-6). This tick also transmits *Francisella tularensis*, the causative agent for tularemia (7, 8), a  
81 yet to be described disease agent, suspected as *Borrelia lonestari*, which causes Lyme disease-  
82 like symptoms referred to as southern tick-associated rash illness (STARI) (9, 10) and also an *E.*  
83 *ruminantium*-like organism referred to as the Panola Mountain *Ehrlichia* (PME) (11). There is

84 also evidence that *A. americanum* may transmit *Rickettsia amblyommii*, *R. rickettsia*, and *R.*  
85 *parkeri*, the causative agents to rickettsiosis to humans (12, 13). This tick has also been reported  
86 to transmit the Heartland and Bourbon viruses to humans (14, 15). Most recently, this tick has  
87 been shown to be responsible for causing an  $\alpha$ -gal allergy or mammalian meat allergy (MMA) in  
88 humans upon tick bite (16). In veterinary health, *A. americanum* transmits *Theileria cervi* to deer  
89 (17), and *E. ewingii* to dogs (18). There are reports of mortality in deer fawns that were attributed  
90 to a combination of heavy *A. americanum* infestation and *T. cervi* infections (19). In livestock  
91 production, heavy infestations were thought to cause low productivity in cattle (20, 21). In the  
92 Southern US, *A. americanum* appears to be the most dominant tick species that bite humans,  
93 which has been reported to be responsible for 83% of human tick infestations (22).

94         The success of ticks as pests and vectors of TBD agents is facilitated by secreted tick  
95 salivary proteins that are injected into the host to regulate the tick's evasion of host defense (23).  
96 There is evidence that repeatedly infested animals develop immunity against tick saliva proteins  
97 and are protected against TBD transmissions such as *Francisella tularensis* (24), *B. burgdorferi*  
98 (25-27), *Babesia* spp. (28), Thogoto virus (29), tick-borne encephalitis virus (30) and *T. parva*  
99 *bovis* (31). Therefore, identification of tick saliva proteins that ticks inject into the host during  
100 feeding might lead to development of tick saliva protein-based vaccines to prevent TBD  
101 infections.

102         The goal of this study was to utilize systems biology approach to identify proteins that *A.*  
103 *americanum* ticks injects every 24 h during feeding. This study builds upon our recent findings  
104 that identified *Ixodes scapularis* tick saliva proteins that are secreted every 24 h during first five  
105 days of feeding (32), partial and replete fed *Rhipicephalus microplus* (33), and replete fed adult  
106 and nymph *Haemaphysalis longicornis* (34). Others have reported proteins in saliva of replete

107 fed *R. sanguineus* (35) and three and five day fed *Dermacentor andersoni* (36). A related study  
108 reported proteins in *Ornithodoros moubata* (soft tick) identified from saliva collected after four  
109 months from feeding (37). Most recently, the saliva proteomes of unfed *I. scapularis* and *A.*  
110 *americanum* exposed to different hosts have been identified (38). In this study, we report  
111 proteins that *A. americanum* ticks sequentially inject into the host every 24 h during feeding.  
112 Comparison of the *A. americanum* tick saliva proteome in this study with other saliva proteomes  
113 of other tick species allowed us to identify tick saliva proteins that are likely utilized by multiple  
114 tick species to regulate feeding, and these might represent potential antigens for anti-tick vaccine  
115 development.

116

## 117 **Materials and Methods**

### 118 *Ethics statement*

119 All experiments were done according to the animal use protocol approved by Texas  
120 A&M University Institutional Animal Care and Use Committee (IACUC) (AUP 2011-207 and  
121 2011-189) that meets all federal requirements, as defined in the Animal Welfare Act (AWA), the  
122 Public Health Service Policy (PHS), and the Humane Care and Use of Laboratory Animals.

123

### 124 *A. americanum* tick saliva collection

125 *A. americanum* ticks were purchased from the tick rearing facility at Oklahoma State  
126 University (Stillwater, OK, USA). Routinely, ticks were fed on rabbits as previously described  
127 (39, 40). Ticks were restricted to feed on the outer part of the ear of New Zealand rabbits with  
128 orthopedic stockinet's glued with Kamar adhesive (Kamar Products Inc., Zionsville, IN, USA).  
129 To stimulate female *A. americanum* ticks to attach onto the host to start feeding and to be

130 inseminated to complete the feeding process, male ticks (15 per ear) were pre-fed for three days  
131 prior to placing female ticks onto rabbit ears to feed. A total of 50 female *A. americanum* ticks  
132 (25 per ear) were placed into tick containment apparatus on each of the three rabbits and allowed  
133 to attach.

134 Saliva of female *A. americanum* tick was collected as previously described (32, 33).  
135 Saliva was collected from 15 ticks fed for 24, 48, 72, 96, 120, 144, 168, and 192 h, respectively,  
136 ten ticks fully fed but not detached from the host (BD) and six ticks spontaneously detached from  
137 the host (SD). Briefly, tick saliva was collected every 15 – 30 min intervals for a period of  
138 approximately 4 h at room temperature from ticks that were previously injected with 1-3  $\mu$ L of  
139 2% pilocarpine hydrochloride in phosphate buffered saline (PBS, pH 7.4) as published by our  
140 group (32, 38).

141

#### 142 *Identification of A. americanum tick saliva proteins by LC-MS/MS*

143 Identification of tick saliva proteins using LC-MS/MS was done in two methods: “in-gel”  
144 digestion (GeLCMS) and “in-solution” digestion (shotgun proteomics) of tick saliva protein  
145 peptides as described (32-34). For the in-gel preparation approach, saliva from a pool of 30 ticks  
146 collected from 24, 72, 120, and 168 h fed were resolved on a Novex 4-20% Tris-Glycine SDS-  
147 PAGE gradient (Thermo, Waltham, MA, USA), stained with Coomassie Brilliant Blue, visible  
148 protein bands excised and submitted for LC-MS/MS as described (33, 41). For the in-solution  
149 digestion method,  $\sim$ 4.5  $\mu$ g of total tick saliva proteins (in triplicate runs using  $\sim$ 1.5  $\mu$ g per run)  
150 per feeding time point (24, 36, 48, 72, 96, 120, 144, 168, 192, BD, and SD) were processed for  
151 LC-MS/MS as published by our group (32-34).

152

153 *Database searching of tandem mass spectra*

154 Proteins in *A. americanum* tick saliva were identified according to the previously  
155 described pipeline (32-34). To prepare the protein database used for protein identification, we  
156 extracted the coding sequences (CDS) from *A. americanum* transcriptomes that were assembled  
157 from Illumina sequence reads (BioProject accession # PRJNA226980) (42) using an automated  
158 pipeline in Visual Basic (Microsoft, Redmond, Washington, USA) provided Dr. Jose M. Ribeiro  
159 (NIH), based on similarities to known proteins (43). Contigs from the assembled *A. americanum*  
160 transcriptome were used to identify open reading frames (ORFs) that were larger than 50 amino  
161 acids in all six frames. The identified ORFs were subjected to blastp using several amino acid  
162 sequence databases downloaded from NCBI (non-redundant [nr] Acari and refseq-invertebrate),  
163 Uniprot (nr-Acari), MEROPS database (44), the GeneOntology (GO) FASTA subset (45) and the  
164 conserved domains database (CDD) of NCBI (46) containing the COG (47), PFAM (48), and  
165 SMART motifs (49). As a false-discovery approach to identify transcripts related to hosts, we  
166 searched the ORFs against the nr-databases from NCBI for rabbit, mouse, rat, goat, sheep, cow,  
167 monkey, and humans. CDS were extracted from blastp searches that matched with 70% identity  
168 and e-value of  $1e^{-40}$ . To remove redundancies, CD-HIT (50) was used to remove sequences at  
169 98% identity. The extracted CDS (n=110,587) were concatenated with *Oryctolagus cuniculus*  
170 from Uniprot ([www.uniprot.org](http://www.uniprot.org)) (n=21,148) and reverse sequences of all entries were used to  
171 identify peptides from tandem mass spectra.

172 For the in-gel method, proteins were identified by searching MS/MS spectra against the  
173 protein database (described above) using the MASCOT software version 2.2 (Matrix Science,  
174 London, UK) with the following parameters: tryptic specificity, one missed cleavage and a mass  
175 tolerance of 0.2 Da in the MS mode and 0.2 Da for MS/MS ions. Carbamidomethylation of



176 cysteine was set as a fixed modification, and methionine oxidation was set as variable  
177 modifications. Mascot peptide identifications required ion scores higher than the associated  
178 identity scores of 20 and 35 for doubly and triply charged peptides, respectively. Protein  
179 identifications were accepted if they contained at least 2 identified peptides. To be included in  
180 this analysis, all peptide sequences had to have 100% identity with assigned proteins.

181 For the in-solution approach, proteins were identified by first extracting the tandem mass  
182 spectra from Thermo RAW files using RawExtract 1.9.9.2 (51) and then searching against the  
183 protein database (described above) using ProLuCID in the Integrated Proteomics Pipeline  
184 Ver.5.0.1 (52). At least two peptide matches were required to be considered a protein hit. A  
185 cutoff score was established to accept a protein false discovery rate (FDR) of 1% based on the  
186 number of decoys. Additionally, a minimum sequence length of six residues per peptide was  
187 required. Results were post processed to only accept PSMs with <10ppm precursor mass error.  
188 Finally, the protein matches from each sampled time points were concatenated into one file using  
189 Identification Compare (IDcompare) program on IP2- Integrated Proteomics Pipeline Ver.5.0.1  
190 (52).

191 For functional annotation, both tick and rabbit proteins were searched against the  
192 following databases: non-redundant (NR), Acari and refseq-invertebrate from NCBI, Acari from  
193 Uniprot, MEROPS database (44), the GeneOntology (GO) FASTA subset (45), and the  
194 conserved domains database of NCBI (46) containing the COG (47), PFAM (48), and SMART  
195 motifs (49). Outputs from the blast searches were used in the classifier program in Dr. Ribeiro's  
196 visual basic program (43) to functionally categorize the identified proteins based on the best  
197 match from among all the blast screens. The functionally annotated proteins were manually  
198 validated.

199 *Relative abundance and graphical visualization of secretion dynamics of A. americanum tick*  
200 *saliva proteins.*

201 Relative abundance and secretion dynamics were determined as described (32) using  
202 normalized spectral abundance factors (NSAF) that were validated as reliable in a label-free  
203 relative quantification approach (53-55). For each functional category or individual protein,  
204 NSAF was expressed as a percent (%) of total NSAF for that time point. Percent NSAF values  
205 were normalized using Z-score statistics using the formula  $Z = \frac{X - \mu}{\sigma}$ , where  $Z$  is the Z-score,  $X$  is  
206 the NSAF for each protein per time point,  $\mu$  is the mean throughout time points,  $\sigma$  is the standard  
207 deviation throughout time points. Normalized percent NSAF values were used to generate heat  
208 maps using the heatmap2 function from the gplots library in R (56).

209

210 *Identification of A. americanum saliva proteins found in saliva of other tick species*

211 *A. americanum* tick saliva proteins in this study were searched against published tick  
212 saliva proteomes of *R. microplus* (32), *I. scapularis* (33), *H. longicornis* (34), *R. sanguineus* (35),  
213 *D. andersoni* (36), and *O. moubata* (37) using local BLASTp analysis. Databases of protein  
214 sequences reported for each tick saliva proteome were extracted from NCBI or Uniprot and  
215 screened by BLASTp using the *A. americanum* saliva proteome (from this study) as the query.  
216 Protein matches  $\geq 70\%$  identity was reported.

217

## 218 **Results and Discussion**

219 *Protein profile and abundance changes every 24 h during A. americanum tick feeding*

220 Previous studies have demonstrated that the protein profile and abundance in salivary  
221 glands of female *A. americanum* is dynamic and changes during the course of tick feeding (57).

222 However, a limitation to the previous study was that it did not inform which salivary gland  
223 proteins were secreted during feeding. To attempt at capturing changes in tick saliva protein  
224 profiles, we successfully used pilocarpine to induce and collect saliva from *A. americanum* ticks  
225 every 24 h during the first eight days of tick feeding as well as from ticks that had engorged but  
226 had not detached, and replete fed ticks as described (32, 58). In early feeding stages (24-72 h), *A.*  
227 *americanum* tick saliva was observed as a white flake that accumulated on the mouthparts over  
228 time and was collected every 15 - 30 min for 4 h by washing the mouthparts with sterile  
229 phosphate buffered saline. Tick saliva was more evident after 72 h of feeding, observed as  
230 droplets of liquid forming at the mouthparts. Proteins in tick saliva were identified by LC-  
231 MS/MS sequencing in two approaches: “in-gel” digestion (GeLCMS) and “in-solution” digestion  
232 (shotgun proteomics) of tick saliva protein peptides.

233 For the “in-gel” digestion approach, saliva that was collected from 24, 72, 120, and 168 h  
234 fed *A. americanum* ticks was electrophoresed on a 4-20% SDS-PAGE and Coomassie blue  
235 staining. Subsequently visible protein bands (n=157) (Fig. 1) were individually excised,  
236 processed for in-gel trypsinization and LC-MS/MS analysis. The peptide MS/MS spectra were  
237 searched using MASCOT software version 2.2 (Matrix Science, London, UK) against a  
238 combined protein database (tick, rabbit, and human contaminants [i.e keratin]) that was  
239 translated from coding domains (n=110,587) that were assembled from Bioproject #  
240 PRJNA226980 (42). This analysis identified a total of 76 proteins (294 peptides) in tick saliva of  
241 which 55 (229 peptides) and 21 (64 peptides) belonged to tick and rabbit, respectively  
242 (Supplemental table 1). Of the total 55 tick saliva proteins 23, 16, 41, and 19 were identified in  
243 saliva of 24, 72, 120 and 168 h fed, respectively (Tables 1A-C). Likewise, we identified 1, 19, 8,  
244 and 4 rabbit proteins in 24, 72, 120 and 168 h fed tick saliva, respectively (Tables 1A-C).

245 Table 1A. *Amblyomma americanum* saliva proteins (250-100 kDa) identified from in gel  
246 digestion and LC-MS/MS during feeding

| Molecular weight | Feeding Time Points (h)          |                                             |                                                      |                                  |                            |                                  |                            |                                  |                                        |                            |                            |                                                      |                                 |                                 |
|------------------|----------------------------------|---------------------------------------------|------------------------------------------------------|----------------------------------|----------------------------|----------------------------------|----------------------------|----------------------------------|----------------------------------------|----------------------------|----------------------------|------------------------------------------------------|---------------------------------|---------------------------------|
|                  | 24 h                             |                                             |                                                      | 72 h                             |                            |                                  | 120 h                      |                                  |                                        | 168 h                      |                            |                                                      |                                 |                                 |
|                  | Gel Band                         | Contig                                      | Description                                          | Gel Band                         | Contig                     | Description                      | Gel Band                   | Contig                           | Description                            | Gel Band                   | Contig                     | Description                                          |                                 |                                 |
| ≥ 250 kDa        | C1-C4                            | N/A                                         | N/A                                                  | D1                               | N/A                        | N/A                              | E1-E4                      | N/A                              | N/A                                    | F1-F2                      | N/A                        | N/A                                                  |                                 |                                 |
|                  |                                  |                                             |                                                      | D2                               | XP_002711050.1             | keratin 6A-like                  | E5                         | Aam-426945                       | TIL domain containing protein, partial | F3                         | Aam-28660                  | putative neutral endopeptidase-like protein, partial |                                 |                                 |
|                  |                                  |                                             |                                                      | D3-D8                            | N/A                        | N/A                              |                            | Aam-59478                        | TIL domain containing protein, partial | F4                         | Aam-28660                  | putative neutral endopeptidase-like protein, partial |                                 |                                 |
|                  | C5                               | Aam-3564                                    | heme lipoprotein precursor                           | D9                               | Aam-3564                   | heme lipoprotein precursor       | E6-E7                      | Aam-587352                       | TIL domain containing protein, partial | F5-F10                     | N/A                        | N/A                                                  |                                 |                                 |
|                  |                                  |                                             |                                                      | D10                              | XP_002719410.1             | keratin 10                       |                            | E8                               | Aam-3564                               | heme lipoprotein precursor | F11                        | Aam-54072                                            | Vitellogenin B                  |                                 |
|                  |                                  |                                             |                                                      | D11-D12                          | N/A                        | N/A                              | E9-E11                     | N/A                              | N/A                                    | Aam-3564                   |                            | heme lipoprotein precursor                           |                                 |                                 |
|                  |                                  |                                             |                                                      | D13                              | N/A                        | N/A                              |                            | E12                              | Aam-3564                               | heme lipoprotein precursor | F12                        | N/A                                                  | N/A                             |                                 |
| 250 - 150 kDa    | C6-C7                            | N/A                                         | N/A                                                  | D13                              | N/A                        | N/A                              | E13                        | XP_002711050.1                   | keratin 6A-like                        | F13                        | N/A                        | N/A                                                  |                                 |                                 |
|                  | C8                               | Aam-3564                                    | heme lipoprotein precursor                           | D14                              | XP_017197646.1             | keratin 6A-like                  |                            | Aam-54072                        | Vitellogenin B                         |                            |                            |                                                      |                                 |                                 |
|                  | C9                               | Aam-3564                                    | heme lipoprotein precursor                           | D15                              | XP_017197646.1             | keratin 6A-like                  | E14                        | N/A                              | N/A                                    | N/A                        | N/A                        |                                                      |                                 |                                 |
| Aam-220360       | putative vitellogenin-1, partial | E15                                         | Aam-3564                                             |                                  |                            |                                  | heme lipoprotein precursor |                                  |                                        |                            |                            |                                                      |                                 |                                 |
| 150 - 100 kDa    | C10                              | Aam-3564                                    | heme lipoprotein precursor                           | D16                              | Aam-220360                 | putative vitellogenin-1, partial | E17                        | Aam-3564                         | heme lipoprotein precursor             | F14                        | Aam-392504                 | putative alpha-2-macroglobulin-like protein          |                                 |                                 |
|                  |                                  |                                             |                                                      |                                  |                            |                                  |                            | Aam-186025                       | heme lipoprotein precursor             |                            |                            |                                                      |                                 |                                 |
|                  |                                  |                                             |                                                      |                                  |                            |                                  |                            | Aam-954297                       | glucose dehydrogenase, putative        |                            |                            |                                                      |                                 |                                 |
|                  |                                  |                                             |                                                      |                                  |                            |                                  |                            | Aam-144361                       | heme lipoprotein precursor             |                            |                            |                                                      |                                 |                                 |
|                  |                                  |                                             |                                                      |                                  |                            |                                  |                            | Aam-3564                         | heme lipoprotein precursor             |                            |                            |                                                      |                                 |                                 |
|                  | Aam-392504                       | putative alpha-2-macroglobulin-like protein | Aam-62352                                            | putative vitellogenin-1, partial | Aam-186025                 | heme lipoprotein precursor       | Aam-220360                 | putative vitellogenin-1, partial |                                        |                            |                            |                                                      |                                 |                                 |
|                  | Aam-62355                        | vitellogenin 4, partial                     | D17                                                  | Aam-3564                         | heme lipoprotein precursor | E18                              | Aam-50363                  | hypothetical protein             | F15                                    | Aam-3564                   | heme lipoprotein precursor |                                                      |                                 |                                 |
|                  | Aam-3564                         | heme lipoprotein precursor                  |                                                      |                                  |                            |                                  | Aam-220360                 | putative vitellogenin-1, partial |                                        |                            |                            |                                                      |                                 |                                 |
|                  | Aam-186025                       | heme lipoprotein precursor                  |                                                      |                                  |                            |                                  | Aam-954297                 | glucose dehydrogenase, putative  |                                        |                            |                            |                                                      |                                 |                                 |
|                  | C11                              | Aam-392513                                  | putative alpha-2-macroglobulin-like protein, partial | D18                              | Aam-3564                   | heme lipoprotein precursor       | E19                        | Aam-3564                         | heme lipoprotein precursor             | F16                        | Aam-3564                   | heme lipoprotein precursor                           |                                 |                                 |
|                  |                                  |                                             |                                                      |                                  |                            |                                  |                            | Aam-220360                       | putative vitellogenin-1, partial       |                            |                            |                                                      | Aam-54072                       | Vitellogenin B                  |
|                  |                                  |                                             |                                                      |                                  |                            |                                  |                            | Aam-3564                         | heme lipoprotein precursor             |                            |                            |                                                      | Aam-252303                      | glucose dehydrogenase, putative |
|                  |                                  |                                             |                                                      |                                  |                            |                                  |                            | Aam-186025                       | heme lipoprotein precursor             |                            |                            |                                                      | Aam-275098                      | glucose dehydrogenase, putative |
| Aam-50363        |                                  |                                             |                                                      |                                  |                            |                                  |                            | hypothetical protein             | Aam-80557                              |                            |                            |                                                      | glucose dehydrogenase, putative |                                 |
| C12              | Aam-186025                       | heme lipoprotein precursor                  | D19                                                  | Aam-3564                         | heme lipoprotein precursor | E19                              | Aam-220360                 | putative vitellogenin-1, partial | F16                                    | Aam-186025                 | heme lipoprotein precursor |                                                      |                                 |                                 |
|                  |                                  |                                             |                                                      |                                  |                            |                                  | Aam-3564                   | heme lipoprotein precursor       |                                        |                            |                            |                                                      |                                 |                                 |
|                  |                                  |                                             |                                                      |                                  |                            |                                  | Aam-50363                  | hypothetical protein             |                                        |                            |                            |                                                      |                                 |                                 |

247

248 Table 1B. *Amblyomma americanum* saliva proteins (100-37 kDa) identified from in gel digestion  
249 and LC-MS/MS during feeding

| Molecular weight | Feeding Time Points (h) |            |                            |                                     |                                                 |                                                      |                        |                             |                                                      |                                        |                            |                                                      |                                                             |
|------------------|-------------------------|------------|----------------------------|-------------------------------------|-------------------------------------------------|------------------------------------------------------|------------------------|-----------------------------|------------------------------------------------------|----------------------------------------|----------------------------|------------------------------------------------------|-------------------------------------------------------------|
|                  | 24 h                    |            |                            | 72 h                                |                                                 |                                                      | 120 h                  |                             |                                                      | 168 h                                  |                            |                                                      |                                                             |
|                  | Gel Band                | Contig     | Description                | Gel Band                            | Contig                                          | Description                                          | Gel Band               | Contig                      | Description                                          | Gel Band                               | Contig                     | Description                                          |                                                             |
| 100 - 75 kDa     | C13                     | Aam-3564   | heme lipoprotein precursor | D20                                 | N/A                                             | liver transferrin                                    | E20                    | Aam-75534                   | metabotropic glutamate receptor 2/3                  | F17                                    | Aam-3564                   | heme lipoprotein precursor                           |                                                             |
|                  |                         |            |                            | Aam-3564                            | heme lipoprotein precursor                      |                                                      |                        | Aam-54072                   | Vitellogenin B                                       |                                        |                            |                                                      |                                                             |
|                  | C14                     | AAB58347.2 | serum albumin precursor    | D21                                 | CAA41424.1                                      | serum albumin precursor                              | E21                    | XP_002711050.1              | keratin 6A-like                                      | F18                                    | Aam-3564                   | heme lipoprotein precursor                           |                                                             |
|                  |                         |            |                            | NP_001075813.1                      | serum albumin precursor                         |                                                      |                        | 4F5V_A                      | Chain A, Crystal Structure Of Leporine Serum Albumin |                                        | Aam-75534                  | metabotropic glutamate receptor 2/3                  |                                                             |
|                  | C15                     | N/A        | N/A                        | XP_017197646.1                      | keratin 6A-like                                 | keratin 6A-like                                      | E22                    | Aam-3564                    | heme lipoprotein precursor                           | F19                                    | 4F5V_A                     | Chain A, Crystal Structure Of Leporine Serum Albumin |                                                             |
| Aam-949183       |                         |            |                            |                                     |                                                 |                                                      |                        | Basic tail secreted protein | Aam-3564                                             |                                        | heme lipoprotein precursor |                                                      |                                                             |
| 75 - 50 kDa      | C16                     | Aam-24634  | Serine protease inhibitor  | D23                                 | 4F5V_A                                          | Chain A, Crystal Structure Of Leporine Serum Albumin | E23                    | XP_002719410.1              | keratin 10                                           | F20                                    | Aam-3564                   | heme lipoprotein precursor                           |                                                             |
|                  |                         |            |                            | Aam-24638                           | Putative lysosomal & prostatic acid phosphatase |                                                      |                        | Aam-3564                    | heme lipoprotein precursor                           |                                        |                            |                                                      |                                                             |
|                  |                         |            |                            | Aam-271199                          | putative lysosomal & prostatic acid phosphatase |                                                      |                        | Aam-271199                  | putative lysosomal & prostatic acid phosphatase      |                                        |                            |                                                      |                                                             |
|                  | C17                     | Aam-28434  | Serine protease inhibitor  | XP_002719410.1                      | keratin 10                                      | keratin 10                                           | E25                    | Aam-24638                   | Putative lysosomal & prostatic acid phosphatase      | F22                                    | Aam-3564                   | heme lipoprotein precursor                           |                                                             |
|                  |                         |            |                            |                                     |                                                 |                                                      |                        | Aam-28434                   | Serine protease inhibitor                            |                                        | Aam-28434                  | Serine protease inhibitor                            |                                                             |
|                  |                         |            |                            |                                     |                                                 |                                                      |                        | Aam-2651                    | Serine protease inhibitor                            |                                        | Aam-488146                 | serine protease inhibitor                            |                                                             |
|                  | C18                     | N/A        | N/A                        | D26                                 | AAA31288.1                                      | Ig gamma heavy chain constant region, partial        | E28                    | Aam-1027384                 | putative secreted protein, partial                   | F24                                    | XP_017200220.1             | beta actin                                           |                                                             |
|                  |                         |            |                            |                                     |                                                 |                                                      |                        | AAB58347.2                  | serum albumin precursor                              |                                        | XP_017200220.1             | beta actin                                           |                                                             |
|                  |                         |            |                            |                                     |                                                 |                                                      |                        | Aam-20799                   | actin                                                |                                        | Aam-20799                  | actin                                                |                                                             |
|                  | 50 - 37 kDa             | C19        | Aam-235530                 | putative tick tit 20                | D29                                             | XP_017200220.1                                       | beta actin             | E29                         | Aam-12781                                            | putative toll-like receptor 5          | F25                        | Aam-1027384                                          | putative secreted protein, partial                          |
|                  |                         |            |                            |                                     |                                                 |                                                      |                        |                             | Aam-16505                                            | putative inducible metalloproteinase   |                            | Aam-1027384                                          | putative secreted protein, partial                          |
|                  |                         |            |                            |                                     |                                                 |                                                      |                        |                             | Aam-20799                                            | actin                                  |                            | AAC78495.1                                           | annexin I                                                   |
|                  |                         | C20        | Aam-328165                 | putative secreted protein precursor | D30                                             | XP_002716936.1                                       | fibrinogen, beta chain | E30                         | Aam-20216                                            | putative cement protein RIM36, partial | F26                        | Aam-12781                                            | putative toll-like receptor 5                               |
|                  |                         |            |                            |                                     |                                                 |                                                      |                        |                             | Aam-2651                                             | Serine protease inhibitor              |                            | Aam-34094                                            | putative glyceraldehyde 3-phosphate dehydrogenase           |
|                  |                         |            |                            |                                     |                                                 |                                                      |                        |                             | NP_001075579.1                                       | haptoglobin                            |                            | Aam-17458                                            | putative glycine-rich cell wall structural protein, partial |
| C21              | N/A                     | N/A        | D31                        | NP_001075579.1                      | haptoglobin                                     | E31                                                  | N/A                    | N/A                         | F27                                                  | N/A                                    | N/A                        |                                                      |                                                             |

250  
251

252 Table 1C. *Amblyomma americanum* saliva proteins (37-10 kDa) identified from in gel digestion  
 253 and LC-MS/MS during feeding

| Molecular weight | Feeding Time Points (h) |                         |                                               |            |                                          |                                      |            |                                                          |                                                          |           |                           |                                                  |     |                         |                               |
|------------------|-------------------------|-------------------------|-----------------------------------------------|------------|------------------------------------------|--------------------------------------|------------|----------------------------------------------------------|----------------------------------------------------------|-----------|---------------------------|--------------------------------------------------|-----|-------------------------|-------------------------------|
|                  | 24 h                    |                         |                                               | 72 h       |                                          |                                      | 120 h      |                                                          |                                                          | 168 h     |                           |                                                  |     |                         |                               |
|                  | Gel Band                | Contig                  | Description                                   | Gel Band   | Contig                                   | Description                          | Gel Band   | Contig                                                   | Description                                              | Gel Band  | Contig                    | Description                                      |     |                         |                               |
| 37 - 25 kDa      | C20                     | Aam-30101               | AV422                                         | D34        | Aam-68822                                | putative secreted protein            | E32        | Aam-16628                                                | putative secreted protein precursor                      | F28       | Aam-16628                 | putative secreted protein precursor              |     |                         |                               |
|                  |                         | Aam-64998;<br>Aam-19567 | GGY domain-containing protein                 |            |                                          |                                      | E33        | Aam-68822                                                | putative secreted protein                                |           |                           |                                                  |     |                         |                               |
|                  |                         | Aam-216130              | Histamine binding protein (HBP)/<br>Lipocalin |            |                                          |                                      | E34        | Aam-15540                                                | putative tpa exp. secreted protein                       |           |                           |                                                  | F29 | NIA                     | NIA                           |
|                  | C21                     | Aam-328185              | putative secreted protein precursor           | D35        | P01840.1                                 | Ig kappa-b4 chain C region           | E35        | Aam-30101                                                | AV422                                                    | F30       | Aam-15540                 | putative tpa exp. secreted protein               |     |                         |                               |
|                  |                         | Aam-68822               | putative secreted protein                     |            |                                          |                                      |            | Aam-957531                                               | putative low-density lipoprotein receptor domain class a |           |                           |                                                  |     |                         |                               |
|                  |                         | Aam-216130              | Histamine binding protein (HBP)/<br>Lipocalin |            |                                          |                                      |            | Aam-30101                                                | AV422                                                    |           |                           |                                                  | F31 | Aam-64998;<br>Aam-19567 | GGY domain-containing protein |
|                  |                         | NIA                     | NIA                                           |            |                                          |                                      |            | Aam-19567                                                | GGY domain-containing protein                            |           |                           |                                                  |     |                         |                               |
| C22              | NIA                     | NIA                     | D36                                           | NIA        | NIA                                      | E36                                  | Aam-70356  | putative major epididymal secretory protein he1, partial | F32                                                      | NIA       | NIA                       |                                                  |     |                         |                               |
| 25 - 20 kDa      | C23                     | NIA                     | NIA                                           | D37        | Aam-16505                                | putative inducible metalloproteinase | E37        | Aam-64998;<br>Aam-19567                                  | GGY domain-containing protein                            | F33       | Aam-16505                 | putative inducible metalloproteinase             |     |                         |                               |
|                  |                         |                         |                                               |            |                                          |                                      |            | Aam-30101                                                | AV422                                                    |           |                           |                                                  |     |                         |                               |
|                  |                         |                         |                                               |            |                                          |                                      |            | Aam-70356                                                | putative major epididymal secretory protein he1, partial |           |                           |                                                  |     |                         |                               |
|                  | C24                     | Aam-1038189             | putative secreted protein precursor           | D38        | NIA                                      | NIA                                  | E38        | Aam-21134                                                | putative salivary lipid                                  | F34       | XP_002711050.1            | keratin 6A-like                                  |     |                         |                               |
|                  |                         |                         |                                               |            |                                          |                                      |            | Aam-16505                                                | putative inducible metalloproteinase                     |           |                           |                                                  |     |                         |                               |
|                  |                         |                         |                                               |            |                                          |                                      |            | Aam-235530                                               | putative tick til 20                                     |           |                           |                                                  |     |                         |                               |
| 20 - 15 kDa      | C25                     | NIA                     | NIA                                           | D39        | AAC61771.1                               | calgranulin B                        | E40        | Aam-235530                                               | putative tick til 20                                     | F35-F38   | NIA                       | NIA                                              |     |                         |                               |
|                  |                         |                         |                                               |            | P25230.1                                 | Antimicrobial protein CAP18          |            |                                                          |                                                          |           |                           |                                                  |     |                         |                               |
|                  |                         |                         |                                               |            | Aam-851110                               | histidine-rich glycoprotein-like     |            |                                                          |                                                          |           |                           |                                                  |     |                         |                               |
|                  | C26                     | Aam-23118               | putative tick cistatins 1                     | D40        | CAA24247.1                               | beta-globin                          | E41        | Aam-851110                                               | histidine-rich glycoprotein-like                         | F35-F38   | NIA                       | NIA                                              |     |                         |                               |
|                  |                         |                         |                                               |            | XP_002712698.1                           | histone cluster 1, H2ag-like         |            |                                                          |                                                          |           |                           |                                                  |     |                         |                               |
|                  |                         |                         |                                               |            | CAA24247.1                               | beta-globin                          |            |                                                          |                                                          |           |                           |                                                  |     |                         |                               |
|                  |                         |                         |                                               |            | CAA28447.1                               | alpha-1-globin                       |            |                                                          |                                                          |           |                           |                                                  |     |                         |                               |
| C27-C28          | NIA                     | NIA                     | D41                                           | Aam-23118  | putative tick cistatins 1                | E43                                  | Aam-11351  | putative secreted salivary gland peptide                 | F39                                                      | Aam-20302 | putative secreted protein |                                                  |     |                         |                               |
|                  |                         |                         |                                               | Aam-292762 | globin 1, partial                        |                                      | CAA24247.1 | beta-globin                                              |                                                          |           |                           |                                                  |     |                         |                               |
|                  |                         |                         |                                               | Aam-11351  | putative secreted salivary gland peptide |                                      | Aam-80953  | putative secreted protein                                |                                                          |           |                           |                                                  |     |                         |                               |
|                  |                         |                         |                                               | AAA31269.1 | beta-hemoglobin, partial                 |                                      | Aam-23118  | putative tick cistatins 1                                |                                                          |           |                           |                                                  |     |                         |                               |
| 15 - 10 kDa      | C29                     | NIA                     | NIA                                           | D42        | CAA28447.1                               | alpha-1-globin                       | E44-E46    | NIA                                                      | NIA                                                      | F40       | Aam-24452                 | putative chymotrypsin-elastase inhibitor ioxidin |     |                         |                               |
|                  |                         |                         |                                               | D43        | Aam-861740                               | neurocalcin-like protein             |            |                                                          |                                                          |           |                           |                                                  |     |                         |                               |
|                  |                         |                         |                                               |            |                                          |                                      |            |                                                          |                                                          |           |                           |                                                  |     |                         |                               |

254

255

256 For in the “in-solution” digestion approach, saliva collected from ticks that had fed for  
 257 24, 48, 72, 96, 120, 144, 168, and 192 h as well as ticks that were apparently engorged but were  
 258 not detached from the host (BD) and replete fed (SD) was subjected to LC-MS/MS analysis.  
 259 Peptide mass spectra were searched against the combined database (described above) using the

260 ProLuCID search engine (52). This analysis identified a total of 1612 proteins of which 1182,  
261 335, 30, and 65 were considered as respective tick, rabbit, and contaminants or reversed proteins  
262 (Supplemental table 2). We respectively identified 450, 540, 419, 441, 332, 529, 478, 536, 312,  
263 and 325 tick proteins in the 10 different saliva samples. Similarly, we respectively identified 127,  
264 130, 115, 147, 112, 140, 199, 198, 78, and 282 as rabbit proteins (Supplemental table 2). The  
265 identification of 1182 tick and 335 rabbit unique proteins in tick saliva demonstrates the  
266 complexity of tick and host interactions.

267

268 *Tick and rabbit proteins in A. americanum tick saliva are annotated in multiple functional*  
269 *categories*

270 For putative functional annotation, identified proteins were searched against entries in  
271 public databases, NCBI, Uniprot, and MEROPS. This analysis categorized the 55 tick and 21  
272 rabbit proteins that were identified in the “in-gel” digestion method into 12 and 9 functional  
273 protein categories, respectively (Tables 1A, 1B and 1C). Proteins that were identified in the “in-  
274 solution” digestion approach (1182 tick and 335 rabbit proteins) were categorized into a  
275 respective 27 (Tables 2A and 2B) and 25 (Tables 3A and 3B) functional categories. It is  
276 interesting but not surprising to note that all proteins that were identified in the “in-gel” digestion  
277 approach were among those that were identified in the “in-solution” digestion approach. We are  
278 aware of the fact that, utilizing both methods might be perceived as redundant, however the  
279 advantage of the “in-gel” digestion method was that, we determined the molecular identities of  
280 the predominant protein bands on Coomassie blue-stained *A. americanum* tick saliva SDS-PAGE  
281 (Fig. 1, Tables 1A-C). For instance, the predominant protein band between 100-150 kDa (Fig. 1)  
282 consists of heme-binding storage proteins called hemelipoproteins and vitellogenins.

283 Table 2A. Numbers and cumulative relative abundance of tick protein classes in *Amblyomma*  
 284 *americanum* saliva during 24-120 h of feeding

| Classification           | Feeding Time Point |          |               |          |               |          |               |          |               |          |
|--------------------------|--------------------|----------|---------------|----------|---------------|----------|---------------|----------|---------------|----------|
|                          | 24 h               |          | 48 h          |          | 72 h          |          | 96 h          |          | 120 h         |          |
|                          | Protein Count      | NSAF (%) | Protein Count | NSAF (%) | Protein Count | NSAF (%) | Protein Count | NSAF (%) | Protein Count | NSAF (%) |
| antimicrobial            | 6                  | 4.20     | 6             | 3.30     | 5             | 6.01     | 5             | 6.15     | 5             | 6.73     |
| cytoskeletal             | 42                 | 4.77     | 16            | 1.32     | 25            | 2.13     | 14            | 1.86     | 6             | 0.71     |
| detoxification           | 19                 | 2.16     | 15            | 0.71     | 12            | 0.72     | 15            | 0.89     | 3             | 0.18     |
| evasin                   | 0                  | 0.00     | 6             | 0.74     | 2             | 0.24     | 6             | 0.68     | 7             | 1.67     |
| extracellular matrix     | 20                 | 1.81     | 11            | 1.20     | 17            | 1.48     | 11            | 0.64     | 6             | 0.37     |
| glycine rich             | 23                 | 2.41     | 43            | 5.81     | 44            | 9.82     | 41            | 4.86     | 27            | 6.83     |
| heme/iron binding        | 16                 | 20.20    | 16            | 7.48     | 15            | 15.27    | 16            | 12.35    | 9             | 5.81     |
| immune-related           | 11                 | 2.96     | 9             | 2.28     | 8             | 4.12     | 9             | 4.47     | 7             | 3.54     |
| ixodegrin                | 1                  | 0.46     | 5             | 0.82     | 1             | 0.84     | 2             | 0.47     | 2             | 0.62     |
| lipocalin                | 8                  | 0.74     | 17            | 2.90     | 2             | 0.55     | 6             | 1.01     | 3             | 4.39     |
| metabolism, amino acid   | 3                  | 0.08     | 0             | 0.00     | 1             | 0.02     | 0             | 0.00     | 0             | 0.00     |
| metabolism, carbohydrate | 11                 | 0.57     | 7             | 0.22     | 8             | 0.36     | 9             | 0.77     | 3             | 0.06     |
| metabolism, energy       | 18                 | 1.22     | 17            | 1.54     | 13            | 1.48     | 10            | 0.94     | 2             | 0.04     |
| metabolism, lipid        | 14                 | 1.07     | 19            | 1.14     | 18            | 1.19     | 14            | 1.33     | 8             | 0.57     |
| metabolism, nucleic acid | 7                  | 2.48     | 18            | 1.99     | 9             | 0.97     | 9             | 2.19     | 13            | 1.22     |
| mucin                    | 3                  | 0.21     | 5             | 0.53     | 4             | 0.54     | 6             | 0.96     | 4             | 0.27     |
| nuclear regulation       | 7                  | 0.39     | 7             | 0.45     | 8             | 1.04     | 7             | 1.24     | 7             | 1.00     |
| protease                 | 17                 | 0.72     | 25            | 1.07     | 20            | 0.97     | 25            | 1.46     | 27            | 4.08     |
| protease inhibitor       | 55                 | 22.28    | 76            | 21.14    | 52            | 11.10    | 64            | 15.33    | 66            | 20.32    |
| proteasome machinery     | 8                  | 1.57     | 6             | 0.50     | 6             | 1.29     | 6             | 1.50     | 6             | 1.18     |
| protein modification     | 16                 | 0.59     | 6             | 0.14     | 16            | 0.84     | 7             | 0.22     | 5             | 0.13     |
| protein synthesis        | 6                  | 0.16     | 2             | 0.05     | 4             | 0.14     | 2             | 0.06     | 0             | 0.00     |
| signal transduction      | 14                 | 3.57     | 11            | 4.74     | 3             | 0.39     | 7             | 2.01     | 8             | 1.80     |
| tick specific proteins   | 110                | 23.99    | 188           | 39.44    | 118           | 37.88    | 140           | 37.87    | 105           | 38.28    |
| transcription machinery  | 4                  | 0.24     | 1             | 0.03     | 3             | 0.18     | 3             | 0.11     | 0             | 0.00     |
| transporter/ receptor    | 10                 | 1.12     | 6             | 0.42     | 4             | 0.37     | 7             | 0.62     | 3             | 0.19     |
| transposon element       | 1                  | 0.02     | 2             | 0.03     | 1             | 0.05     | 0             | 0.00     | 0             | 0.00     |
| Total                    | 450                | 100.00   | 540           | 100.00   | 419           | 100.00   | 441           | 100.00   | 332           | 100.00   |

285



286 Table 2B. Numbers and cumulative relative abundance of tick protein classes in *Amblyomma*  
 287 *americanum* saliva during 144 to completion of feeding

| Classification           | Feeding Time Point |          |               |          |               |          |               |          |               |          |
|--------------------------|--------------------|----------|---------------|----------|---------------|----------|---------------|----------|---------------|----------|
|                          | 144 h              |          | 168 h         |          | 192 h         |          | BD            |          | SD            |          |
|                          | Protein Count      | NSAF (%) | Protein Count | NSAF (%) | Protein Count | NSAF (%) | Protein Count | NSAF (%) | Protein Count | NSAF (%) |
| antimicrobial            | 4                  | 4.31     | 4             | 2.87     | 3             | 2.98     | 3             | 5.04     | 3             | 1.49     |
| cytoskeletal             | 38                 | 3.43     | 11            | 0.98     | 16            | 1.23     | 3             | 0.39     | 14            | 1.42     |
| detoxification           | 21                 | 1.71     | 11            | 0.67     | 18            | 1.13     | 7             | 0.79     | 12            | 0.55     |
| evasin                   | 5                  | 1.54     | 7             | 3.40     | 6             | 3.39     | 1             | 0.83     | 5             | 2.86     |
| extracellular matrix     | 18                 | 1.61     | 7             | 0.38     | 19            | 0.85     | 14            | 1.75     | 0             | 0.00     |
| glycine rich             | 14                 | 1.03     | 19            | 2.00     | 31            | 2.79     | 9             | 0.47     | 8             | 0.56     |
| heme/iron binding        | 17                 | 22.96    | 14            | 7.31     | 16            | 12.38    | 17            | 26.07    | 10            | 7.23     |
| immune-related           | 14                 | 3.76     | 9             | 2.37     | 14            | 3.09     | 12            | 4.65     | 7             | 1.66     |
| ixodegrin                | 1                  | 0.58     | 1             | 0.20     | 1             | 0.62     | 2             | 0.78     | 0             | 0.00     |
| lipocalin                | 8                  | 1.11     | 24            | 6.57     | 20            | 5.69     | 20            | 4.07     | 26            | 14.76    |
| metabolism, amino acid   | 4                  | 0.07     | 2             | 0.07     | 1             | 0.04     | 0             | 0.00     | 0             | 0.00     |
| metabolism, carbohydrate | 22                 | 1.30     | 4             | 0.12     | 14            | 0.90     | 14            | 2.56     | 5             | 0.17     |
| metabolism, energy       | 13                 | 0.81     | 9             | 0.34     | 10            | 0.50     | 2             | 0.30     | 6             | 0.15     |
| metabolism, lipid        | 16                 | 0.95     | 5             | 0.39     | 16            | 1.01     | 12            | 1.29     | 3             | 0.39     |
| metabolism, nucleic acid | 14                 | 1.80     | 10            | 0.93     | 16            | 1.72     | 3             | 1.11     | 8             | 1.21     |
| mucin                    | 7                  | 0.33     | 3             | 0.13     | 9             | 0.33     | 3             | 0.56     | 0             | 0.00     |
| nuclear regulation       | 10                 | 0.74     | 8             | 1.49     | 8             | 1.02     | 1             | 0.26     | 11            | 2.15     |
| protease                 | 40                 | 3.37     | 38            | 4.57     | 43            | 4.21     | 36            | 2.93     | 36            | 7.70     |
| protease inhibitor       | 83                 | 17.41    | 81            | 15.82    | 78            | 14.79    | 59            | 19.17    | 39            | 17.08    |
| proteasome machinery     | 7                  | 0.87     | 6             | 1.09     | 6             | 0.87     | 4             | 0.11     | 6             | 1.68     |
| protein modification     | 18                 | 0.58     | 10            | 0.26     | 13            | 0.38     | 0             | 0.00     | 11            | 0.44     |
| protein synthesis        | 2                  | 0.03     | 2             | 0.06     | 5             | 0.15     | 0             | 0.00     | 2             | 0.08     |
| signal transduction      | 14                 | 3.11     | 10            | 1.49     | 9             | 2.43     | 7             | 1.89     | 5             | 0.53     |
| tick specific proteins   | 127                | 25.15    | 175           | 46.18    | 157           | 36.86    | 77            | 23.84    | 103           | 37.75    |
| transcription machinery  | 2                  | 0.04     | 1             | 0.02     | 1             | 0.01     | 0             | 0.00     | 1             | 0.02     |
| transporter/ receptor    | 10                 | 1.38     | 6             | 0.26     | 6             | 0.62     | 6             | 1.14     | 3             | 0.07     |
| transposon element       | 0                  | 0.00     | 1             | 0.04     | 0             | 0.00     | 0             | 0.00     | 1             | 0.02     |
| Total                    | 529                | 100.00   | 478           | 100.00   | 536           | 100.00   | 312           | 100.00   | 325           | 100.00   |

288

289 Table 3A. Numbers and cumulative relative abundance of rabbit protein classes in *Amblyomma*  
 290 *americanum* saliva during 24-120 h of feeding

| Classification            | Feeding Time Point |                   |               |                   |               |                   |               |                   |               |                   |
|---------------------------|--------------------|-------------------|---------------|-------------------|---------------|-------------------|---------------|-------------------|---------------|-------------------|
|                           | 24 h               |                   | 48 h          |                   | 72 h          |                   | 96 h          |                   | 120 h         |                   |
|                           | Protein Count      | NSAF (%)          | Protein Count | NSAF (%)          | Protein Count | NSAF (%)          | Protein Count | NSAF (%)          | Protein Count | NSAF (%)          |
| Antimicrobial             | 3                  | 0.00134357        | 4             | 0.00192864        | 3             | 0.00171397        | 5             | 0.0086771         | 6             | 0.00763598        |
| Antioxidant               | 2                  | 0.00042155        | 1             | 7.576E-05         | 1             | 0.00035322        | 0             | 0                 | 0             | 0                 |
| Cytoskeletal              | 19                 | 0.01798265        | 14            | 0.01629188        | 11            | 0.00953933        | 12            | 0.01698913        | 7             | 0.01026072        |
| Extracellular matrix      | 3                  | 0.00049492        | 1             | 0.000267          | 1             | 0.0000291         | 2             | 0.0001466         | 2             | 0.0003605         |
| Fibrinogen                | 3                  | 0.00022576        | 4             | 0.00017475        | 0             | 0                 | 1             | 6.7612E-05        | 2             | 0.00022745        |
| Globin/ RBC               | 20                 | 0.08991802        | 18            | 0.02390767        | 12            | 0.01107268        | 15            | 0.02658361        | 15            | 0.02722383        |
| Heme/Iron binding         | 5                  | 0.01948816        | 7             | 0.01314713        | 2             | 0.00443612        | 7             | 0.00916951        | 4             | 0.00596773        |
| Immunity related          | 9                  | 0.00268497        | 7             | 0.0023492         | 5             | 0.00211006        | 8             | 0.00712898        | 15            | 0.01097912        |
| Keratin                   | 17                 | 0.00337019        | 32            | 0.01031924        | 35            | 0.02503904        | 41            | 0.04692297        | 27            | 0.03080678        |
| Lipocalin                 | 0                  | 0                 | 1             | 0.00051272        | 1             | 0.00052663        | 1             | 0.00283525        | 1             | 0.00167895        |
| Metabolism, amino acid    | 0                  | 0                 | 0             | 0                 | 0             | 0                 | 0             | 0                 | 0             | 0                 |
| Metabolism, carbohydrates | 5                  | 0.00133936        | 4             | 0.00037672        | 5             | 0.00064097        | 5             | 0.00074812        | 3             | 0.00033307        |
| Metabolism, energy        | 1                  | 2.8207E-05        | 0             | 0                 | 0             | 0                 | 3             | 0.00071594        | 1             | 0.00018482        |
| Metabolism, lipid         | 0                  | 0                 | 0             | 0                 | 0             | 0                 | 2             | 0.00093604        | 2             | 0.00138574        |
| Metabolism, nucleic acids | 0                  | 0                 | 0             | 0                 | 0             | 0                 | 0             | 0                 | 0             | 0                 |
| Nuclear regulation        | 8                  | 0.00325694        | 16            | 0.00871704        | 15            | 0.01681692        | 18            | 0.01938734        | 15            | 0.01609353        |
| Protease                  | 0                  | 0                 | 1             | 0.00013596        | 0             | 0                 | 2             | 0.00146001        | 1             | 4.2416E-05        |
| Protease Inhibitors       | 8                  | 0.0025413         | 5             | 0.00116042        | 1             | 0.0001394         | 5             | 0.00178596        | 1             | 0.00071414        |
| Protein export            | 0                  | 0                 | 2             | 0.00017604        | 2             | 0.00115523        | 3             | 0.00209215        | 3             | 0.00247782        |
| Protein modification      | 7                  | 0.00102993        | 3             | 0.0003923         | 7             | 0.00221869        | 6             | 0.00095378        | 4             | 0.00051132        |
| Protein synthesis         | 4                  | 0.00135166        | 2             | 0.0001756         | 4             | 0.00122153        | 4             | 0.0006344         | 0             | 0                 |
| Proteasome machinery      | 2                  | 0.00600273        | 2             | 0.0021349         | 2             | 0.00578655        | 2             | 0.0056957         | 2             | 0.00490593        |
| Signal transduction       | 9                  | 0.00264391        | 1             | 0.00047693        | 7             | 0.00264375        | 1             | 0.00089234        | 1             | 0.00035228        |
| Transporter/ Receptor     | 2                  | 0.00013431        | 5             | 0.00049163        | 1             | 3.5648E-05        | 4             | 0.00061835        | 0             | 0                 |
| Transcription machinery   | 0                  | 0                 | 0             | 0                 | 0             | 0                 | 0             | 0                 | 0             | 0                 |
| <b>Total</b>              | <b>127</b>         | <b>0.15425811</b> | <b>130</b>    | <b>0.08321153</b> | <b>115</b>    | <b>0.08547884</b> | <b>147</b>    | <b>0.15444091</b> | <b>112</b>    | <b>0.12214214</b> |

291

292 Table 3B. Numbers and cumulative relative abundance of rabbit protein classes in *Amblyomma*  
 293 *americanum* saliva during 144 to completion of feeding

| Classification            | Feeding Time Point |                 |               |                 |               |                 |               |                 |               |                 |
|---------------------------|--------------------|-----------------|---------------|-----------------|---------------|-----------------|---------------|-----------------|---------------|-----------------|
|                           | 144 h              |                 | 168 h         |                 | 192 h         |                 | BD            |                 | SD            |                 |
|                           | Protein Count      | NSAF (%)        | Protein Count | NSAF (%)        | Protein Count | NSAF (%)        | Protein Count | NSAF (%)        | Protein Count | NSAF (%)        |
| Antimicrobial             | 8                  | 0.007565        | 9             | 0.018337        | 9             | 0.015212        | 6             | 0.004394        | 8             | 0.015088        |
| Antioxidant               | 3                  | 0.000677        | 2             | 0.00071         | 3             | 0.000384        | 0             | 0               | 4             | 0.000927        |
| Cytoskeletal              | 20                 | 0.019936        | 29            | 0.014844        | 26            | 0.019163        | 6             | 0.011922        | 55            | 0.031601        |
| Extracellular matrix      | 1                  | 3.63E-05        | 0             | 0               | 1             | 2.58E-05        | 1             | 8.41E-05        | 3             | 0.000973        |
| Fibrinogen                | 1                  | 0.00011         | 5             | 0.002512        | 5             | 0.001638        | 0             | 0               | 5             | 0.001423        |
| Globin/ RBC               | 18                 | 0.105112        | 19            | 0.100601        | 18            | 0.067832        | 16            | 0.052725        | 21            | 0.109247        |
| Heme/iron binding         | 3                  | 0.005258        | 9             | 0.011255        | 7             | 0.011786        | 3             | 0.005854        | 9             | 0.015765        |
| Immunity related          | 15                 | 0.007953        | 23            | 0.02019         | 17            | 0.014264        | 5             | 0.002246        | 23            | 0.025243        |
| Keratin                   | 20                 | 0.010315        | 34            | 0.012893        | 37            | 0.021782        | 21            | 0.010099        | 40            | 0.045599        |
| Lipocalin                 | 1                  | 0.002122        | 1             | 0.004206        | 1             | 0.00311         | 1             | 0.001514        | 1             | 0.00534         |
| Metabolism, amino acid    | 0                  | 0               | 1             | 0.000201        | 0             | 0               | 0             | 0               | 1             | 3.83E-05        |
| Metabolism, carbohydrates | 5                  | 0.001337        | 9             | 0.001486        | 7             | 0.001096        | 2             | 0.000114        | 7             | 0.001634        |
| Metabolism, energy        | 2                  | 0.000319        | 2             | 0.000144        | 2             | 0.000364        | 0             | 0               | 6             | 0.000535        |
| Metabolism, lipid         | 0                  | 0               | 0             | 0               | 0             | 0               | 0             | 0               | 2             | 0.000229        |
| Metabolism, nucleic acids | 1                  | 0.000108        | 4             | 0.000989        | 0             | 0               | 0             | 0               | 0             | 0               |
| Nuclear regulation        | 19                 | 0.013472        | 20            | 0.028935        | 24            | 0.022492        | 10            | 0.008565        | 26            | 0.032846        |
| Protease                  | 0                  | 0               | 4             | 0.000876        | 1             | 9.16E-05        | 0             | 0               | 6             | 0.00066         |
| Protease Inhibitors       | 1                  | 0.000202        | 3             | 0.000967        | 2             | 0.000151        | 0             | 0               | 7             | 0.00203         |
| Protein export            | 3                  | 0.001588        | 4             | 0.004882        | 5             | 0.003771        | 2             | 0.00077         | 4             | 0.006886        |
| Protein modification      | 6                  | 0.000988        | 7             | 0.000754        | 12            | 0.001567        | 0             | 0               | 16            | 0.002522        |
| Protein synthesis         | 0                  | 0               | 4             | 0.00057         | 4             | 0.00084         | 0             | 0               | 4             | 0.000866        |
| Proteasome machinery      | 2                  | 0.003209        | 2             | 0.003649        | 2             | 0.003418        | 2             | 0.000584        | 2             | 0.005294        |
| Signal transduction       | 8                  | 0.003392        | 5             | 0.001237        | 9             | 0.001945        | 0             | 0               | 12            | 0.003857        |
| Transporter/ Receptor     | 3                  | 0.000381        | 1             | 6.81E-05        | 4             | 0.000521        | 3             | 0.000589        | 13            | 0.00182         |
| Transcription machinery   | 0                  | 0               | 2             | 6.16E-05        | 2             | 6.68E-05        | 0             | 0               | 7             | 0.000636        |
| <b>Total</b>              | <b>140</b>         | <b>0.184079</b> | <b>199</b>    | <b>0.230369</b> | <b>198</b>    | <b>0.191521</b> | <b>78</b>     | <b>0.099459</b> | <b>282</b>    | <b>0.311061</b> |

294

295

296 Along with findings from electrophoretic profile, the “in-solution” approach confirmed  
 297 the complexity of tick saliva. With redundancy removed at 98% amino acid identity levels, the  
 298 majority of the identified proteins are tick specific proteins (did not match to proteins in non-tick  
 299 organisms) of unknown function (32%), followed by protease inhibitors (PI) (13%), proteases  
 300 (8%), and glycine-rich proteins (6%). Notable protein categories that were  $\leq 5\%$  include  
 301 cytoskeletal, lipocalin, antioxidant/detoxification, extracellular matrix, immune related,  
 302 heme/iron-binding, mucins, evasins, antimicrobials, and ixodegrins (Tables 2A and 2B,

303 Supplemental table 2). For rabbit proteins, the majority are categorized as cytoskeletal (19%),  
304 followed by keratin (13%), nuclear regulation (8%), immunity-related (8%), globin/RBC  
305 degradation (6%), and protein categories that were  $\leq 5\%$  include antimicrobials, heme/iron-  
306 binding, protease inhibitors, proteases, extracellular matrix, antioxidant/detoxification,  
307 fibrinogen and lipocalin (Tables 3A and 3B, Supplemental table 2).

308

309 *The most abundant category of A. americanum tick saliva proteins is tick-specific*

310       Figures 2A and 2B summarizes daily relative abundance of tick saliva proteins during *A.*  
311 *americanum* tick feeding as determined by normalized spectral abundance factor (NSAF), the  
312 index for relative protein abundance (53-55). Fig. 2A shows that three protein categories, tick-  
313 specific saliva proteins of unknown function (TSP), protease inhibitors (PI), and heme/iron  
314 binding proteins were the most abundant ranging from a respective 24-46%, 11-22%, and 6-26%  
315 during feeding (24-192h). Other protein categories at  $\leq 10\%$  in abundance include glycine-rich  
316 proteins, antimicrobial peptides, evasins, and proteases. For rabbit proteins in *A. americanum*  
317 tick saliva, the most predominant functional category was hemoglobin/red blood cell products  
318 (RBC) (13-58%) followed by cytoskeletal (6-20%), heme/iron binding (~5-16%), keratin (2-  
319 30%), and nuclear regulation (2-20%) (Fig. 2B). It is notable that rabbit functional categories  
320 related to immunity, antimicrobial peptides, protease inhibitors and proteases were abundant at  
321  $\leq 8\%$  throughout feeding.

322       The finding that the majority of proteins identified in this study are of unknown function  
323 is not unique to *A. americanum* tick saliva, it is consistent with findings in saliva of *I. scapularis*  
324 (32) and tick salivary gland transcriptomics (59-61). This is potentially a reflection of how little  
325 information exists on the molecular basis of tick feeding physiology.

326 *Majority of A. americanum tick saliva proteins are associated with early stage tick-feeding*  
327 *processes*

328 To gain insight into broad relationships of secretion dynamics of both tick and rabbit  
329 proteins with the tick feeding processes, Z-score statistics normalized NSAF (relative  
330 abundance) values were visualized on heat maps (Figs. 3A and 3B). The clustering patterns are  
331 influenced by cumulative relative abundance of protein category. The blue to red transition  
332 denotes low to high abundance. As shown in figure 3A, the 27 TSP functional categories  
333 clustered into four broad secretion patterns (clusters A-D). Broadly, 74% (20/27) of tick protein  
334 categories are secreted at high abundance within the first 48 h of feeding (Fig. 3A, clusters A, B,  
335 and C) with exception of four categories (evasins, proteases, lipocalins, and nuclear regulation  
336 proteins) in cluster D, which are injected into the host at high abundance starting from day five  
337 of feeding. These proteins could be important proteins regulating early stages of tick feeding  
338 activities such as initiating tick feeding by creating feeding lesion and attaching, while  
339 suppressing host tissue repair defenses and also contribute to transmission of TBD agents.  
340 Protein categories that were identified in abundance starting from the 192 h feeding time point  
341 might be associated regulating the end of the tick-feeding process when the tick detaches from  
342 the host skin with minimal damage.

343 Similarly, the majority of rabbit proteins functional categories (21 of the 25) were  
344 detected at high abundance in saliva of *A. americanum* ticks during feeding (Fig. 3B). The 25  
345 rabbit protein categories in saliva of *A. americanum* ticks segregated into four clusters, A-D (Fig.  
346 3B). Rabbit proteins that were secreted at high abundance starting from 24-72 h of feeding are  
347 part of clusters A and B. Five of the seven proteins in cluster A are highly abundant at 24 and 48

348 h feeding time points, while those in clusters C and D were less abundant in the first 48 h of  
349 feeding and showed varied abundance levels starting from 72 h of feeding.

350

351 *Secretion dynamics of non-housekeeping-like A. americanum tick saliva proteins*

352 Supplemental table 2 lists individual proteins that were identified in *A. americanum* tick  
353 saliva. Thirteen functional categories not considered as housekeeping-like (antimicrobial,  
354 detoxification extracellular matrix/cell adhesion, evasin, glycine-rich, heme/iron binding,  
355 immunity-related, ixodegrin, lipocalin, mucin, protease inhibitors, proteases, and TSPs of  
356 unknown function) (Tables 2A and 2B) accounted for 76% of total number of proteins and  
357 represented more than 82% in relative abundance throughout feeding time points. In the  
358 subsequent sections, we have discussed non-housekeeping-like tick proteins individually per  
359 category (Figs. 4A-S) and have highlighted housekeeping-like tick proteins and rabbit proteins as  
360 a group below. Our lab is interested and is working to understand functions of proteases and  
361 protease inhibitors, and our subsequent discussion below is biased toward these two categories.

362

363 *a) A. americanum tick saliva contains a large diversity of protease inhibitors in nine families*

364 We previously documented at least 18 of the 99 Merops database protease inhibitor (PI)  
365 that might be expressed by *A. americanum* and other tick species (62). Here we show that adult  
366 *A. americanum* ticks secreted at least 155 PIs belonging into eight PI families. These include  
367 Kunitz-type inhibitors (I2, n=68), serine protease inhibitors (serpins, I4, n=21), trypsin inhibitor-  
368 like (TIL, I8, n=36), alpha-2-macroglobulins ( $\alpha$ 2M, I39, n=12), cysteine inhibitors (cystatin, I25,  
369 n=12), thyropins (I31, n=3), phosphatidylethanolamine-binding proteins (I51, n=2), and a tick  
370 carboxypeptidase inhibitor (TCI, n=1). Of significant interest, nearly 75% of PIs (115/155) in

371 this study were secreted in saliva within the first 120 h post-attached fed ticks (Supplemental  
372 table 2). This strongly suggests that functions of tick saliva PIs are associated with regulating  
373 early stages of the tick feeding stages such as tick creation of its feeding site and transmission of  
374 TBD agents, which are critical to the success of ticks as pests and vectors of TBD agents.

375         Of the PI families in this study, serpins are the most studied (42, 62-67), presumably  
376 because functional roles of this protein category are relatable to tick feeding physiology. To  
377 successfully feed and transmit TBD agents, ticks have to overcome serine protease-mediated  
378 host defense pathways that are tightly controlled by inhibitors, including serpins. On this basis, it  
379 was proposed that ticks might utilize serpins to evade host defenses to successfully feed (68).  
380 From this perspective, it is notable that 90% (19/21) of serpins were identified in saliva of ticks  
381 that fed for 24-48 h (Fig. 4A), suggesting these serpins are injected into host and might be  
382 involved with regulating tick feeding within hours of the tick starting to feed. It is interesting to  
383 note that, *A. americanum* serpin 6 and 19, which were previously validated as inhibitors of host  
384 defense system proteases (69, 70) were also found in tick saliva within the first 24 h of feeding  
385 this study. It is notable that 20-50% of PIs were identified at a single time point for all PI  
386 families except serpins, where only 5% (1/21) was found (Supplemental table 2). This might  
387 suggest that the functions of tick saliva serpins are important throughout the tick feeding process,  
388 most likely in evading host defenses.

389         Although not much has been reported on the functional analysis of *A. americanum* tick  
390 cystatins, a lone study has reported that RNAi silencing of a cystatin transcript reduced the  
391 ability of ticks to feed successfully (71). Several researchers have reported cystatins in other tick  
392 species indicated that they play important roles in tick feeding physiology (72). In the soft tick  
393 *Ornithodoros moubata*, a cystatin was internalized by host dendritic cells and targeted cathepsin

394 S and cathepsin C, affecting their maturation (73). Cystatins from other tick species also have  
395 immunosuppressive functions (74-76). Of the 12 cystatins identified in tick saliva from this study  
396 (family I25, Fig. 4B), seven were secreted starting from 72 h of feeding, indicating that majority  
397 of cystatins might be involved in regulating tick feeding functions after the tick has initiated  
398 feeding. On the contrary, four cystatins were secreted within the first 24 h of feeding and were  
399 predominantly secreted throughout feeding.

400 Similar to cystatins, figure 4C shows the secretion dynamics of alpha-2-macroglobulins  
401 ( $\alpha$ 2M), where majority were injected into the host at high abundance toward the end of feeding  
402 (BD). This might suggest that  $\alpha$ 2M could be involved in regulating tick feeding functions toward  
403 the end of tick feeding. There are very few studies on  $\alpha$ 2M in tick feeding physiology. Two  
404 studies have reported the functional roles of  $\alpha$ 2M in soft tick immune defense (77) and anti-  
405 microbial activity in *I. ricinus* (78).

406 Kunitz-type inhibitors and trypsin inhibitor-like (TIL) were the two most, in number of  
407 proteins, identified in all PI families from this study, comprising of a respective 44 and 23% of  
408 total PI proteins in tick saliva during feeding. The secretion dynamics of Kunitz-type inhibitors  
409 (Fig. 4D) and TIL (Fig. 4E) is comparable and notable: the tick appears to secrete a different set  
410 of these inhibitors every 24 h starting from the first day of tick feeding. This might suggest that  
411 functions of these inhibitors are required throughout the tick feeding process. It is also notable  
412 that a total 35% of Kunitz-type inhibitors and 22% of TILs were detected in saliva of replete fed  
413 ticks (SD), unlike the other PIs in this study.

414

415 *b) Majority of proteases in A. americanum saliva are metalloproteases*



416 At the time of this study, protease families that were encoded by *A. americanum* were not  
417 enumerated, presumably because its genome had not been sequenced. However, analysis of  
418 annotated sequences from *I. scapularis* showed that the tick might encode for all protease  
419 categories: aspartic, cysteine, serine, metallo-, and threonine proteases (79). Here, we found that  
420 *A. americanum* secretes at least 94 proteases in saliva during feeding. These 94 proteases belong  
421 in four categories grouped into 15 families: aspartic (family A1, n=4), cysteine (C1, C2, and  
422 C13, n=12), metallo- (M12, M13, M14, M15, M17, M20, M28, and M49, n=56), and serine (S1,  
423 S10, and S28, n=22) proteases (Supplemental table 2, Figs. 4F, 4G, and 4H). Please note that the  
424 heatmap for aspartic proteases was not developed due to low numbers (the secretion dynamics is  
425 presented in Supplemental table 2). The heatmaps (Figs. 4F, 4G, and 4H and Supplemental table  
426 2) show that more than 60% (60/94) of proteases are injected into the host various time points  
427 during the first five days of feeding, demonstrating that some of the proteases in this study are  
428 associated with tick feeding regulation.

429 The observation that metalloproteases are the majority of proteases in saliva of *A.*  
430 *americanum* is consistent with our previous findings in the *I. scapularis* proteome (32). It is  
431 notable that similar to the *I. scapularis* proteome, metalloproteases that were secreted at high  
432 abundance during the first 72 h feeding time points are in families M12 and M13 (Fig. 4G),  
433 indicating that these proteases regulate initial tick feeding functions that are important to both  
434 tick species. Indirect evidence on snake venom M12 proteases that have anti-coagulant activity  
435 (80, 81) suggest that secretion of these proteases at high abundance when the tick is initiating  
436 feeding might be beneficial to tick feeding to prevent blood from clotting, which might otherwise  
437 prevent blood meal feeding. There is also evidence that RNAi silencing of M12 proteases  
438 significantly affected tick-feeding efficiency (82). It has been reported in *I. scapularis* saliva a

439 metalloprotease similar to hemorrhagic proteases of snake venom that act towards gelatin,  
440 fibrin(ogen), and fibronectin (83). Likewise, indirect evidence suggests that ticks might utilize  
441 M13 proteases to regulate host immunity. In mammals, M13 proteases were among other  
442 functions involved in modulating neurotransmitter levels, control blood pressure, involved in  
443 reproduction and cancer progression (84).

444 Another notable similarity between *A. americanum* and *I. scapularis* proteomes is that  
445 both tick species secreted a small number of S1 serine proteases, six and three respectively (Fig.  
446 4G and Supplemental table 2). We are interested in S1 serine proteases due to their functional  
447 roles in signal transduction as activators of protease-activated receptors (85, 86); could the tick  
448 utilize these proteases to interfere with host defense signaling at the tick-feeding site?

449 The observation that *A. americanum* injected cysteine proteases at the beginning of  
450 feeding indicate they might be playing some role(s) in the early stages of tick feeding. Several  
451 studies have documented potential functional roles of cysteine proteases in tick physiology (87-  
452 89). In a lone study, a cysteine protease from *H. longicornis* when silenced by RNAi, showed to  
453 be involved with digestion of a blood meal and increased the number of *Babesia* parasites (90).  
454 Recently, a cathepsin L from the tick, *R. microplus* (BmCL1), was shown to interact with  
455 thrombin at pH 7.5 and impair thrombin-induced fibrinogen clotting via a fibrinogenolytic  
456 activity (91). In helminths, cysteine proteases are the most abundant category of proteins  
457 identified into excretion/secretion products (92) and have been shown to be involved with host  
458 immune evasion (93) and extracellular matrix degradation (94).

459 Majority of studies on tick aspartic proteases are mainly characterized as blood digestion  
460 proteins in the midgut, similar to the mammalian lysosome acidic protease, cathepsin D (95). In  
461 *H. longicornis* adult ticks, the potential role of these proteins in proteolysis of erythrocyte

462 hemoglobin has been reported (96). Other studies have shown the importance of this protease in  
463 embryogenesis, playing roles in vitellin degradation (97) and heme-binding properties (98).  
464 Although only four aspartic proteases were identified in *A. americanum* saliva during feeding,  
465 three of these proteases were present within the first 96 h of feeding, which may implicate roles  
466 in the early stages of tick feeding success (Supplemental table 2).

467

468 *c) Lipocalins/histamine-binding proteins are alternately secreted during tick feeding*

469 Inflammation response is among host defense pathways that ticks must evade to complete  
470 feeding. Histamine is one of the key mediators of inflammation in tissue damage that is expected  
471 to occur in response to tick feeding (99). From this perspective, lipocalins/tick histamine-binding  
472 proteins in tick saliva are suspected to be part of the tick machinery to evade the host's  
473 inflammation defense response through sequestration of histamine that is released at the tick-  
474 feeding site. In this study, we found 46 lipocalins/tick histamine-binding proteins that show two  
475 broad secretion patterns: secreted at multiple feeding time points and those that were alternately  
476 secreted at single time points (Fig. 4I). It is interesting to note that of the total 46 lipocalins  
477 identified in tick saliva during feeding, 22% (10/46) were present within the first 48 h of feeding,  
478 while 35% (16/46) were present after 96 h of feeding, and 43% (20/46) were identified in a  
479 single time point (Fig 4I, Supplemental table 2). Given that in addition to regulating  
480 inflammation, lipocalins/histamine-binding proteins have other diverse functions such as  
481 antimicrobials (100, 101), glucose metabolism (102) and binding several ligands including  
482 serotonin and fatty acids (103, 104), it is most likely that these proteins might be involved in  
483 regulating several other tick feeding functions besides mediating the tick's anti-inflammation  
484 function.

485 *d) Heme binding proteins are secreted at high abundance throughout feeding*

486 Like other animals, ticks require iron and heme (the iron-containing part of hemoglobin)  
487 for normal physiological functions (105). However, ticks do not have a heme biosynthesis  
488 pathway, therefore they must obtain it from host blood (106). Female ticks that were artificially  
489 fed a diet not containing hemoglobin laid sterile eggs (107) demonstrating the importance of  
490 heme in tick biology. However, in high abundance heme can be toxic for the tick (108), therefore  
491 it is postulated that hemelipoproteins and vitellogenins could serve as heme binding proteins to  
492 remove the excess heme from the tick system. Supplemental table 2 lists a total of 17 heme/iron-  
493 binding proteins consisted of hemelipoproteins, vitellogenins, and a ferritin that collectively  
494 accounted for the third most abundant protein category in tick saliva throughout feeding (Fig. 2).  
495 High abundance of hemelipoproteins here is in consistent with other tick saliva proteomes (32-  
496 34). The secretion dynamics summarized in figure 4J revealed two broad secretion patterns,  
497 those that are injected into the host from 24 h through 120 h of feeding (HCB and HCC) and  
498 those that injected into the host starting from 144 h of feeding through the end of tick feeding  
499 (HCD and HCA). Ticks acquire both iron and heme from host blood (106, 109), and thus iron  
500 and/heme-binding proteins are important to normal tick physiology. It has been shown that *R.*  
501 *microplus* hemelipoprotein (HeLp) could bind eight heme molecules (110). Given that  
502 hemelipoprotein is the most abundant protein in tick hemolymph (111), it could be secreted in  
503 saliva as a result of this protein being transferred into the salivary glands when exposed to the  
504 hemolymph. However, transcriptional profile and protein localization of these hemelipoproteins  
505 in salivary glands of unfed and fed adult ticks suggest that they could act in different pathways  
506 during blood-feeding (112). Among other functions it is known that free heme has pro-  
507 inflammatory properties (113). Thus, the presence of hemelipoproteins could lower free heme

508 concentration at the feeding site, reducing inflammation. Other roles of tick hemelipoproteins  
509 such as an antioxidant in transporting other compounds such as cholesterol, phospholipids, and  
510 free fatty acids have been previously reported (114). It is interesting to note that reduction of  
511 vitellogenin receptor (VgR) expression by RNAi resulted in reduced fertility (115) and *Babesia*  
512 *bovis* transmission and oocyte maturation (116).

513

514 *e) Ticks inject multiple antioxidant proteins into the feeding site*

515 Feeding and digestion of large amounts of host blood exposes ticks to hydroxyl radicals  
516 and reactive oxygen species (ROS), which if left uncontrolled could damage tick tissue (117,  
517 118). Expression of antioxidant proteins protect the tick during feeding and digestion of the  
518 blood meal. Studies have shown that RNAi silencing of tick antioxidants caused deleterious  
519 effects to the tick and prevented them to obtain a full blood meal (119, 120). Previous studies by  
520 others and from our lab have documented presence of antioxidants in tick salivary glands (121,  
521 122) and saliva (32-34, 123, 124). In this study we identified 41 putative antioxidant enzymes.  
522 These enzymes include glutathione-S-transferase, thioredoxin, superoxide dismutase, catalase,  
523 peroxinectin, arylsulfatase, aldehyde dehydrogenase, epoxide hydrolase, sulfotransferase,  
524 sulfhydryl oxidase and glycolate oxidase. Figure 4K reveals two broad secretion patterns of tick  
525 saliva antioxidant proteins based on NSAF values as an index for abundance: (i) proteins injected  
526 into the host in high abundance once at various feeding time points (ACA-ACI) and (ii) proteins  
527 that are consecutively injected into the host in high abundance from 24-96 h of feeding (ACF).  
528 Like heme/iron binding proteins, tick antioxidants are presumed to function inside the tick; the  
529 question is why do ticks inject these into the feeding site? Host tissue injury caused during the  
530 creation of the tick-feeding site could trigger release of oxidants such as ROS; could tick saliva

531 antioxidants function to cleanse the blood meal before the tick ingests it or potentially to protect  
532 the host from damage to keep the feeding site balanced?

533

534 *f) Glycine-rich and extracellular matrix/cell adhesion proteins are secreted early during tick*  
535 *feeding*

536         Within 5-30 min of attachment, the tick secretes an adhesive substance called cement,  
537 which anchors ticks onto host skin during its protracted feeding period (125). Tick cement is also  
538 suggested to protect the tick from host immune factors (126, 127) and might function as  
539 antimicrobials at the feeding site (128). Glycine-rich proteins are among categories of tick  
540 proteins that are thought to play key roles in formation of tick cement (125). From this  
541 perspective, glycine-rich proteins are among tick proteins that have received significant research  
542 attention (129-132). In this study we found a total of 67 glycine-rich proteins, which represented  
543 the fifth largest category of proteins identified in tick saliva during feeding (Fig. 2). Nearly 90%  
544 (60/67) of the glycine-rich proteins were secreted in abundance within the first four days of  
545 feeding (Fig. 4L; GCB, GCD, GCE, GCF, and GCG). Tick cement deposition is completed  
546 during the first 96 h of tick feeding (125), and thus it is conceivable that some of the glycine-rich  
547 proteins in this study might be involved with tick cement formation. It is interesting to note that  
548 some of the glycine-rich proteins that were identified from tick cement in our lab (131) and  
549 others (130) were also found in this study (Supplemental table 3). Some of the glycine-rich  
550 proteins were secreted from the 144-h time point, long after tick cement formation; these might  
551 regulate other tick feeding functions. Although glycine-rich proteins are mostly known for their  
552 potential role in tick cement formation, indirect evidence in other organisms indicate that these

553 proteins might be involved in other functions such as host defense and stress response as in  
554 plants (133).

555 Figure 4M summarize the secretion dynamics of 37 extracellular matrix proteins that  
556 were found in this study. Similar to glycine-rich proteins, majority (27/37) of the extracellular  
557 proteins were secreted within the first five days of feeding demonstrating their role in early stage  
558 tick feeding regulation. Our speculation is that some of these proteins will play roles in formation  
559 of tick cement. In a previous study, RNAi silencing of chitinase, also identified in this study,  
560 weakened the tick cement cone to the extent that host blood was leaking out around the  
561 mouthparts of attached ticks (40).

562

563 *g) Antimicrobials, mucins, and immune related proteins are secreted throughout the feeding*  
564 *process*

565 Once the tick has anchored itself onto the host skin and created its feeding lesion, it faces  
566 a difficult task of overcoming host humoral and cellular immunity, and also preventing microbes  
567 in the host skin from colonizing the tick-feeding site. Here we show that *A. americanum* secretes  
568 immunomodulatory and antimicrobial peptides starting within the early stages of the tick feeding  
569 process (Fig. 4N-R). We identified nine antimicrobials consisting of microplusins, lysozymes,  
570 and defensins (Fig. 4N). Previous studies showed that microplusin has dual effects against  
571 fungus and gram-positive bacteria, lysozyme against gram-positive bacteria, and defensin  
572 effective against both gram-positive and -negative bacteria (134-136). The heat map in figure 4N  
573 shows that antimicrobials were injected into the host starting at 24 and 48 h (AMCA), from 72 h  
574 (AMCC), and from 120 h (AMCB). This secretion pattern suggests that the functions of  
575 antimicrobial peptides are needed throughout feeding.

576            Similar to antimicrobials, we identified 12 mucins (Fig. 4O), with ~60% of these proteins  
577 (7/12) being secreted at high abundance within 24-48 h of feeding. Functional roles of mucins in  
578 ticks have not been studied. However, indirect evidence in mammals suggest that mucins might  
579 be involved in antimicrobial activity in that human mucins were shown to encapsulate microbes  
580 (137).

581            Among putative immunomodulatory proteins, we identified evasins (Fig. 4P) and  
582 ixodegrins (Fig. 4Q). Evasins (n=12, Fig. 4P) were shown to bind to chemokines (138, 139) to  
583 reduce leukocytes recruitment to the tick feeding site and therefore contribute to tick evasion of  
584 the host's inflammatory defense. It is interesting to note that the 12 evasins identified in tick  
585 saliva were present after 24 h of feeding and continued to be secreted throughout feeding at  
586 variable levels. This might suggest that evasins might not be involved in regulating tick feeding  
587 functions during the first 24 h of tick feeding.

588            Figure 4Q summarizes the secretion pattern of the six ixodegrin-like proteins found in  
589 tick saliva during feeding in this study. It is interesting to note, 83% (5/6) of these proteins were  
590 identified within the first 48 h of feeding (Supplemental table 2.) These proteins were first  
591 described in *I. scapularis* as inhibitors of platelet aggregation (140). Platelet aggregation is the  
592 first step in the blood clotting system (141), which ticks must overcome to successfully feed.  
593 Thus, the presence of ixodegrins in saliva of *A. americanum* at the start of feeding is beneficial to  
594 tick feeding success. Finally, we also found proteins that show similarity to previously  
595 characterized immunomodulatory proteins (Fig. 4R), which have been validated in other tick  
596 species including p36, which inhibits cell proliferation and cytokine expression (142). These  
597 proteins might play roles in mediating the tick's evasion of host immunity.

598



599 *h) Tick-specific secreted saliva proteins (TSP) of unknown function are alternately secreted.*

600 Over one-third of Ixodidae protein sequences deposited into GenBank are annotated as  
601 hypothetical, secreted, conserved and unknown proteins. However, some are annotated based on  
602 sequence identities and conserved signature motifs, which include basic tail/tailless proteins, 8.9  
603 kDa protein family, leucine-rich proteins, AV422 (a tick saliva protein that is high upregulated  
604 when ticks are stimulated to start feeding [39, 143]), proteins containing RGD motifs, which  
605 might play roles in inhibition of platelet aggregation (140, 144). In this study we have identified  
606 a total of 377 (Fig. 4S) tick saliva proteins that fit the above description that we refer here to as  
607 tick-specific saliva proteins of unknown functions (TSPs). More than 95% (357/377) of the total  
608 TSPs were identified within the first eight days of feeding in tick saliva indicating their potential  
609 roles in regulating the tick feeding process. It is interesting to note that the secretion pattern for  
610 over a third (128/377) of the total TSPs identified in tick saliva during feeding were alternately  
611 injected once during feeding (Supplemental table 2). From the perspective of finding target  
612 antigens for tick vaccine development, TSPs represent a unique opportunity in that they do not  
613 share any homology to host proteins and might not cross-react with the host.

614

615 *A. americanum secretes multiple housekeeping-like proteins in saliva throughout the feeding*  
616 *process*

617 Supplemental table 2 lists 288 housekeeping-like proteins that were identified in this  
618 study. Presence of these proteins in *A. americanum* saliva is not unexpected, as similar findings  
619 have been previously reported in tick saliva (32-34). The 288 housekeeping-like proteins were  
620 classified into 14 categories including those associated with metabolism of amino acids (n=7),  
621 carbohydrates (n=25), energy (n=31), lipids (n=31), and nucleic acids (n=33). Other protein

622 categories include those involved in cytoskeletal (n=53), nuclear regulation (n=16), protein  
623 modification (n=21), proteasome machinery (n= 8), protein synthesis (n=10), signal transduction  
624 (n=24), transposable element (n=3), transcription machinery (n=7), and transporter/receptors  
625 (n=17). It is interesting to note that, within the first 24 h of feeding 12 of the 14 categories were  
626 identified at high abundance (Fig. 3A).

627         One feature of housekeeping-like tick proteins is that they have high sequence identity  
628 with mammalian housekeeping proteins, and for this reason they are discounted as potential  
629 target antigens for tick vaccine development. However, based on literature showing that several  
630 roles of these proteins in host defense, we think that these proteins play an important role in tick  
631 feeding physiology. Housekeeping-like proteins identified here mostly function intracellularly,  
632 and they serve as alarm signals to alert the host defense system to injury when secreted outside  
633 of the cell (145). There is evidence that in the extracellular space, some of the housekeeping  
634 proteins such as heat shock proteins, have anti-inflammatory functions (146), while histone  
635 proteins have antimicrobial activity (147). Given high sequence similarity to host housekeeping  
636 proteins, could it be that some of the tick housekeeping-like proteins play roles in promoting tick  
637 feeding through anti-inflammatory and anti-microbial activity?

638         Another important aspect of tick feeding physiology that has not received much attention  
639 is the fact that host blood meal also contains carbohydrates, lipids and other molecules besides  
640 host proteins. It is notable that some of the tick housekeeping-like proteins in tick saliva have  
641 high similarity to enzymes in the carbohydrate and lipid metabolism pathways. Is the tick  
642 pumping these proteins into the feeding site to process these molecules before the tick takes its  
643 blood meal?

644

645 *Secretion of rabbit host proteins in A. americanum tick saliva is not random*

646 In this study, we identified 335 rabbit host proteins belonging into 25 different categories  
647 that include cytoskeletal (19%), keratin (13%), nuclear regulation (8%), immune-related (8%),  
648 hemoglobin/RBC degradation (6%), transporters/receptors (5%), protein modification (5%), and  
649 protein categories below 4% included antimicrobials, extracellular matrix, heme/iron binding,  
650 detoxification/ antioxidants, metabolism (energy, carbohydrates, lipid, amino acid, and nucleic  
651 acids), protein export, protein synthesis, fibrinogen, protease inhibitors, proteases, signal  
652 transduction, transcription machinery, proteasome machinery, and lipocalin (Tables 3A and 3B,  
653 Supplemental table 2). Relative abundance as determined by NSAF indicated that the most  
654 abundant protein categories consisted of hemoglobin/RBC degradation products (58-13%),  
655 followed by heme/ iron binding host proteins (13-16%), and cytoskeletal (6-20%) (Fig. 3).

656 At a glance, presence of rabbit host proteins in *A. americanum* tick saliva could be  
657 dismissed as host protein contamination. This observation might be strengthened by the fact that  
658 some rabbit host proteins in tick saliva such as keratin, nuclear regulation proteins, and host  
659 antimicrobial peptides increased in abundance as feeding progressed. This suggested that  
660 secretion of host proteins into tick saliva was a consequence of ticks ingesting an increased  
661 amount of host blood, and that some of these host proteins might leak or be regurgitated back  
662 into the host via saliva or esophagus. However, our data here suggests that the tick might  
663 systematically be utilizing host proteins to regulate its tick-feeding site. For instance, mammals  
664 are likely to encode for more than 500 proteases and 150 protease inhibitors (based on rat, mice,  
665 and humans [148]), however we found 9 proteases and 8 protease inhibitors from host origin in  
666 *A. americanum* tick saliva (Supplemental table 2). We are of the view that if secretion of host  
667 proteins was a random process, we could have identified more rabbit host proteases and protease

668 inhibitors. There are reports that human  $\alpha$ 1-antitrypsin and  $\alpha$ 2-macroglobulin are secreted  
669 following injury as occurs during tick feeding, and if left uncontrolled could lead to delayed  
670 wound healing (149), which is beneficial to tick feeding. On this basis, it is highly likely that  
671 ticks inject host  $\alpha$ 1-antitrypsin and  $\alpha$ 2-macroglobulin into the feeding site as a strategy of  
672 evading the host's tissue repair defense response. It is also notable that fibrinogen and neutrophil  
673 gelatinase-associated lipocalin, which among other functions plays important roles in wound  
674 healing, were identified towards the end of feeding (150-153). This is interesting in that the tick-  
675 feeding lesion is completely sealed, preventing leakage of blood, when a replete fed tick detaches  
676 from its feeding site. It has been reported in *Opisthorchis viverrini*, the human liver fluke, that  
677 they secrete proteins in the granulin family that accelerate wound healing (154). Could it be that  
678 the increased abundance of host proteins involved in wound healing are secreted by the tick into  
679 the feeding site towards the end of tick feeding is the tick's way to help its host heal?

680

681 *Different tick species might utilize similar proteins to regulate feeding*

682 At the time of preparing data in this study for publication, several other tick saliva  
683 proteomes had been published. We took advantage of the availability of these data to test the  
684 hypothesis that key proteins that are important to tick feeding might be conserved across tick  
685 taxa. Thus, we compared data in this study to saliva proteomes of *I. scapularis* (32), *R. microplus*  
686 (33), *H. longicornis* (34), *R. sanguineus* (35), *D. andersoni* (36), and *O. moubata* (37). This  
687 analysis revealed that more than 24% (284/1182) of the *A. americanum* tick saliva proteins in  
688 this study have homologs in saliva proteomes of other tick species (Supplemental table 4). Table  
689 4 highlights the 163, 138, 137, 92, 22, and 11 *A. americanum* tick saliva proteins in 22 categories  
690 that were >70% identical to proteins in saliva of *I. scapularis* (32), *H. longicornis* (34), *D.*

691 Table 4. *Amblyomma americanum* tick saliva protein categories that are conserved in other tick  
 692 saliva proteomes at 70% identity

| Classification               | <i>I. scapularis</i> | <i>H. longicornis</i> | <i>D. andersoni</i> | <i>R. microplus</i> | <i>O. moubata</i> | <i>R. sanguineus</i> |
|------------------------------|----------------------|-----------------------|---------------------|---------------------|-------------------|----------------------|
| Cytoskeletal                 | 36                   | 27                    | 19                  | 12                  | 3                 | 0                    |
| Detoxification               | 13                   | 9                     | 9                   | 5                   | 0                 | 2                    |
| Extracellular matrix         | 3                    | 6                     | 9                   | 3                   | 0                 | 1                    |
| Glycine rich                 | 5                    | 4                     | 4                   | 4                   | 0                 | 0                    |
| Immune related               | 4                    | 3                     | 3                   | 4                   | 1                 | 1                    |
| Metabolism, amino acids      | 4                    | 1                     | 0                   | 0                   | 0                 | 0                    |
| Metabolism, carbohydrates    | 4                    | 3                     | 6                   | 1                   | 1                 | 0                    |
| Metabolism, energy           | 20                   | 11                    | 12                  | 0                   | 4                 | 0                    |
| Metabolism, lipids           | 2                    | 1                     | 3                   | 4                   | 0                 | 0                    |
| Metabolism, nucleic acids    | 11                   | 9                     | 1                   | 0                   | 2                 | 0                    |
| Nuclear regulation           | 6                    | 5                     | 6                   | 4                   | 0                 | 0                    |
| Protein modification         | 16                   | 14                    | 8                   | 9                   | 7                 | 0                    |
| Protease                     | 6                    | 6                     | 8                   | 3                   | 0                 | 0                    |
| Proteasome machinery         | 7                    | 6                     | 5                   | 0                   | 0                 | 6                    |
| Protein synthesis            | 4                    | 2                     | 3                   | 2                   | 0                 | 0                    |
| Secreted saliva proteins     | 5                    | 6                     | 22                  | 14                  | 0                 | 0                    |
| Lipocalin                    | 0                    | 0                     | 0                   | 4                   | 0                 | 0                    |
| Protease Inhibitors          | 5                    | 14                    | 10                  | 11                  | 1                 | 1                    |
| Signal transduction          | 6                    | 3                     | 6                   | 1                   | 1                 | 0                    |
| Heme/iron binding            | 1                    | 7                     | 2                   | 9                   | 2                 | 0                    |
| Transcription machinery      | 2                    | 0                     | 1                   | 1                   | 0                 | 0                    |
| Transporters/ receptors      | 3                    | 1                     | 0                   | 1                   | 0                 | 0                    |
| <b>Total Protein Matches</b> | <b>163</b>           | <b>138</b>            | <b>137</b>          | <b>92</b>           | <b>22</b>         | <b>11</b>            |

693  
 694

695 *andersoni* (36), *R. microplus* (33), *O. moubata* (37) and *R. sanguineus* (35), respectively. Of the  
 696 22 categories of proteins, immune-related proteins were present in all tick saliva proteomes.  
 697 Likewise, proteins from nine other categories (antioxidant/detoxification, carbohydrate  
 698 metabolism, cytoskeletal, extracellular matrix, heme/iron binding protease, protease inhibitor,  
 699 protein modification, and signal transduction) from *A. americanum* saliva were present in five  
 700 other tick saliva proteomes. It is interesting to note when comparing saliva proteins in the *A.*  
 701 *americanum* tick-specific saliva secreted protein category with other hard ticks, with the  
 702 exception of *R. sanguineus*, five proteins were shared with Prostriata *I. scapularis*, and 6, 22, and  
 703 14 from Metastriata *H. longicornis*, *D. andersoni*, and *R. microplus*, respectively.

704 We would like the reader to note that with the exception of *I. scapularis* tick saliva  
705 proteome for which proteins were identified every 24 h during feeding (32) the other tick saliva  
706 proteomes were limited to a narrow range of tick feeding time points and/or fully engorged ticks.  
707 This might be the reason that higher numbers of *A. americanum* tick saliva proteins were found  
708 compared to *I. scapularis* tick saliva proteome. It is interesting to note that, *A. americanum* and *I.*  
709 *scapularis* are biologically different as they belong to different tick lineages, Prostriata and  
710 Metastriata (155, 156). Thus, tick saliva proteins that are shared between these two tick species  
711 could regulate evolutionarily conserved proteins that regulate essential tick feeding physiology  
712 functions. On this basis, such proteins could be targeted for tick vaccine development. We have  
713 previously shown that RNAi silencing of *A. americanum* tick saliva serpin 19, an anti-coagulant  
714 (69), which is also conserved in *I. scapularis* ticks (42, 62), caused significant mortality  
715 demonstrating the importance of this protein in tick physiology (32).

716

### 717 **Conclusion and Future perspective**

718 This study has made a unique contribution toward understanding the molecular basis of  
719 *A. americanum* tick feeding physiology. We believe that this study provides a good starting point  
720 toward discovery of effective targets for anti-tick vaccine development. Our strategy to identify  
721 tick saliva proteins every 24 h during feeding has allowed us to map tick saliva proteins to  
722 different phases of the tick feeding process. This is significant as it provides for the opportunity  
723 to focus on tick saliva proteins that regulate the tick feeding process that precede critical events  
724 such as TBD agent transmission. Majority of TBD agents are transmitted after 48 h of tick  
725 attachment (157, 158), and therefore proteins that are secreted from 24 and 48 h of tick feeding  
726 time points are prime candidates for tick vaccine research. It is important to acknowledge the fact

727 that, during the course of feeding, *A. americanum* ticks secretion of more than 1500 tick and  
728 rabbit host proteins might indicate that the tick has inbuilt systems to evade host immunity, and  
729 that it is going to be a challenge to actually find effective targets for anti-tick vaccine  
730 development. However, the findings that nearly 300 *A. americanum* tick saliva proteins were  
731 also secreted by other tick species is very encouraging as these proteins might provide insight  
732 into conserved mechanisms that are utilized by all ticks to successfully feed, and could serve as  
733 potential targets for anti-tick vaccine development.

734 We have recently described proteins (n=340) in saliva of unfed *A. americanum* ticks that  
735 were stimulated to start feeding on three different hosts: rabbits, dogs, and humans (38). It is  
736 notable that 70% (231/340) of proteins in saliva of unfed *A. americanum* ticks were found in the  
737 tick saliva proteome described here (Supplemental table 5). The significance of these data is that  
738 the 231 tick saliva proteins present in saliva of both unfed and fed ticks represent proteins that  
739 are potentially injected into the host within minutes of the tick attaching onto host skin and are  
740 likely associated with regulating initial tick feeding events. Immunologically blocking functions  
741 of these proteins might significantly disrupt tick feeding and prevent transmission of TBD  
742 agents. In summary, this study has set the foundation for in-depth studies to understand *A.*  
743 *americanum* tick feeding physiology and find effective targets for development of tick-antigen  
744 based vaccines to prevent TBD infections.

745

746 **Acknowledgements:**

747 This research was supported by National Institutes of Health grants (AI081093, AI093858,  
748 AI074789, AI074789-01A1S1) to AM and National Center for Research Resources  
749 (5P41RR011823) and National Institute of General Medical Sciences (8P41GM103533) to JRY.

750 The funders had no role in study design, data collection and analysis, decision to publish, or  
751 preparation of the manuscript.

752

753 **Data Availability**

754 The mass spectrometry proteomics data have been deposited to the ProteomeXchange  
755 Consortium via the PRIDE (159) partner repository with the dataset identifier PXD014844.



## 756 **References**

- 757 1. Dantas-Torres, F., Chomel, B.B., Otranto, D., 2012. Ticks and tick-borne diseases: a One  
758 Health perspective. *Trends Parasitol.* 28, 437-446.
- 759 2. Raghavan, R.K., Peterson, A.T., Cobos, M.E., Ganta, R., Foley, D., 2019. Current and  
760 Future Distribution of the Lone Star Tick, *Amblyomma americanum* (L.) (Acari:  
761 Ixodidae) in North America. *PLoS One* 14, e0209082.
- 762 3. Anderson, B.E., Sims, K.G., Olson, J.G., Childs, J.E., Piesman, J.F., Happ, C.M.,  
763 Maupin, G.O., Johnson, B.J., 1993. *Amblyomma americanum*: a potential vector of  
764 human ehrlichiosis. *Am. J. Trop. Med. Hyg.* 49, 239-244.
- 765 4. Buller, R.S., Arens, M., Hmiel, S.P., Paddock, C.D., Sumner, J.W., Rikhisa, Y., Unver,  
766 A., Gaudreault-Keener, M., Manian, F.A., Liddell, A.M., Schmulowitz, N., Storch, G.A.,  
767 1999. *Ehrlichia ewingii*, a newly recognized agent of human ehrlichiosis. *N. Engl. J.*  
768 *Med.* 341, 148-155.
- 769 5. Murphy, G.L., Ewing, S.A., Whitworth, L.C., Fox, J.C., Kocan, A.A., 1998. A molecular  
770 and serologic survey of *Ehrlichia canis*, *E. chaffeensis*, and *E. ewingii* in dogs and ticks  
771 from Oklahoma. *Vet. Parasitol.* 79, 325-339.
- 772 6. Wolf, L., McPherson, T., Harrison, B., Engber, B., Anderson, A., Whitt, P., 2000.  
773 Prevalence of *Ehrlichia ewingii* in *Amblyomma americanum* in North Carolina. *J. Clin.*  
774 *Microbiol.* 38, 2795.
- 775 7. Hopla CE, D.C., 1953. The isolation of *Bacterium tularensis* from the tick *Amblyomma*  
776 *americanum*. *journal of kansas entomological society* 26, 71-72.
- 777 8. Taylor, J.P., Istre, G.R., McChesney, T.C., Satalowich, F.T., Parker, R.L., McFarland,  
778 L.M., 1991. Epidemiologic characteristics of human tularemia in the southwest-central  
779 states, 1981-1987. *Am. J. Epidemiol.* 133, 1032-1038.
- 780 9. Armstrong, P.M., Brunet, L.R., Spielman, A., Telford, S.R., 3rd, 2001. Risk of Lyme  
781 disease: perceptions of residents of a Lone Star tick-infested community. *Bull. World*  
782 *Health Organ.* 79, 916-925.
- 783 10. James, A.M., Liveris, D., Wormser, G.P., Schwartz, I., Montecalvo, M.A., Johnson, B.J.,  
784 2001. *Borrelia lonestari* infection after a bite by an *Amblyomma americanum* tick. *J.*  
785 *Infect. Dis.* 183, 1810-1814.
- 786 11. Reeves, W.K., Loftis, A.D., Nicholson, W.L., Czarkowski, A.G., 2008. The first report of  
787 human illness associated with the Panola Mountain *Ehrlichia* species: a case report. *J.*  
788 *Med. Case Rep.* 2, 139.
- 789 12. Apperson, C.S., Engber, B., Nicholson, W.L., Mead, D.G., Engel, J., Yabsley, M.J., Dail,  
790 K., Johnson, J., Watson, D.W., 2008. Tick-borne diseases in North Carolina: is  
791 "*Rickettsia amblyommii*" a possible cause of rickettsiosis reported as Rocky Mountain  
792 spotted fever? *Vector Borne Zoonotic Dis.* 8, 597-606.
- 793 13. Breitschwerdt, E.B., Hegarty, B.C., Maggi, R.G., Lantos, P.M., Aslett, D.M., Bradley,  
794 J.M., 2011. *Rickettsia rickettsii* transmission by a lone star tick, North Carolina. *Emerg.*  
795 *Infect. Dis.* 17, 873-875.
- 796 14. McMullan, L.K., Folk, S.M., Kelly, A.J., MacNeil, A., Goldsmith, C.S., Metcalfe, M.G.,  
797 Batten, B.C., Albarino, C.G., Zaki, S.R., Rollin, P.E., Nicholson, W.L., Nichol, S.T.,  
798 2012. A new phlebovirus associated with severe febrile illness in Missouri. *N. Engl. J.*  
799 *Med.* 367, 834-841.

- 800 15. Savage, H.M., Godsey, M.S., Jr, Lambert, A., Panella, N.A., Burkhalter, K.L., Harmon,  
801 J.R., Lash, R.R., Ashley, D.C., Nicholson, W.L., 2013. First detection of heartland virus  
802 (Bunyaviridae: Phlebovirus) from field collected arthropods. *Am. J. Trop. Med. Hyg.* 89,  
803 445-452.
- 804 16. Steinke, J.W., Platts-Mills, T.A., Commins, S.P., 2015. The alpha-gal story: lessons  
805 learned from connecting the dots. *J. Allergy Clin. Immunol.* 135, 96; quiz 597.
- 806 17. Laird, J.S., Kocan, A.A., Kocan, K.M., Presley, S.M., Hair, J.A., 1988. Susceptibility of  
807 *Amblyomma americanum* to natural and experimental infections with *Theileria cervi*. *J.*  
808 *Wildl. Dis.* 24, 679-683.
- 809 18. Little, S.E., O'Connor, T.P., Hempstead, J., Saucier, J., Reichard, M.V., Meinkoth, K.,  
810 Meinkoth, J.H., Andrews, B., Ullom, S., Ewing, S.A., Chandrashekar, R., 2010. *Ehrlichia*  
811 *ewingii* infection and exposure rates in dogs from the southcentral United States. *Vet.*  
812 *Parasitol.* 172, 355-360.
- 813 19. Yabsley, M.J., Quick, T.C., Little, S.E., 2005. Theileriosis in a white-tailed deer  
814 (*Odocoileus virginianus*) fawn. *J. Wildl. Dis.* 41, 806-809.
- 815 20. Barnard, D.R., Ervin, R.T., Epplin, F.M., 1992. Bio-Economic Impact of *Amblyomma*  
816 *americanum* in Beef Cattle Production Systems. *Tick Vector Biology*, 55-69.
- 817 21. Tolleson, D.R., Teel, P.D., Stuth, J.W., Strey, O.F., Welsh, T.H., Jr, Carstens, G.E.,  
818 Longnecker, M.T., Banik, K.K., Prince, S.D., 2010. Effects of a lone star tick  
819 (*Amblyomma americanum*) burden on performance and metabolic indicators in growing  
820 beef steers. *Vet. Parasitol.* 173, 99-106.
- 821 22. Felz, M.W., Durden, L.A., Oliver, J.H.J., 1996. Ticks parasitizing humans in Georgia and  
822 South Carolina. *The Journal of parasitology* 82,3, 505-508.
- 823 23. Nuttall, P.A., Labuda, M., 2004. Tick-host interactions: saliva-activated transmission.  
824 *Parasitology* 129 Suppl, 177.
- 825 24. Bell, J.F., Stewart, S.J., Wikel, S.K., 1979. Resistance to tick-borne *Francisella*  
826 *tularensis* by tick-sensitized rabbits: allergic klendusity. *Am. J. Trop. Med. Hyg.* 28, 876-  
827 880.
- 828 25. Burke, G., Wikel, S.K., Spielman, A., Telford, S.R., McKay, K., Krause, P.J., Tick-borne  
829 Infection Study Group, 2005. Hypersensitivity to ticks and Lyme disease risk. *Emerg.*  
830 *Infect. Dis.* 11, 36-41.
- 831 26. Nazario, S., Das, S., de Silva, A.M., Deponte, K., Marcantonio, N., Anderson, J.F., Fish,  
832 D., Fikrig, E., Kantor, F.S., 1998. Prevention of *Borrelia burgdorferi* transmission in  
833 guinea pigs by tick immunity. *Am. J. Trop. Med. Hyg.* 58, 780-785.
- 834 27. Wikel, S.K., Ramachandra, R.N., Bergman, D.K., Burkot, T.R., Piesman, J., 1997.  
835 Infestation with pathogen-free nymphs of the tick *Ixodes scapularis* induces host  
836 resistance to transmission of *Borrelia burgdorferi* by ticks. *Infect. Immun.* 65, 335-338.
- 837 28. Francis, J., Little, D.A., 1964. Resistance of Droughtmaster cattle to tick infestation and  
838 babesiosis. *Aust. Vet. J.* 40, 247-253.
- 839 29. Jones, L.D., Nuttall, P.A., 1990. The effect of host resistance to tick infestation on the  
840 transmission of Thogoto virus by ticks. *J. Gen. Virol.* 71 (Pt 5), 1039-1043.
- 841 30. Votiakov, V., P Mishaeva, N., 1980. Possibility of Protecting Vertebrates Against  
842 Transmissible Infection with Tick-Borne Encephalitis Virus. *Vopr Virusol.* 2,170-173.
- 843 31. Fivaz, B.H., Norval, R.A., Lawrence, J.A., 1989. Transmission of *Theileria parva bovis*  
844 (Boleni strain) to cattle resistant to the brown ear tick *Rhipicephalus appendiculatus*  
845 (Neumann). *Trop. Anim. Health Prod.* 21, 129-134.

- 846 32. Kim, T.K., Tirloni, L., Pinto, A.F., Moresco, J., Yates, J.R.,3rd, da Silva Vaz, I.,Jr,  
847 Mulenga, A., 2016. *Ixodes scapularis* Tick Saliva Proteins Sequentially Secreted Every  
848 24 h during Blood Feeding. PLoS Negl Trop. Dis. 10, e0004323.
- 849 33. Tirloni, L., Reck, J., Terra, R.M., Martins, J.R., Mulenga, A., Sherman, N.E., Fox, J.W.,  
850 Yates, J.R.,3rd, Termignoni, C., Pinto, A.F., da Silva Vaz, I.,Jr, 2014. Proteomic Analysis  
851 of Cattle Tick *Rhipicephalus (Boophilus) microplus* Saliva: A Comparison between  
852 Partially and Fully Engorged Females. PLoS One 9, e94831.
- 853 34. Tirloni, L., Islam, M.S., Kim, T.K., Diedrich, J.K., Yates, J.R.,3rd, Pinto, A.F., Mulenga,  
854 A., You, M.J., Da Silva Vaz, I.,Jr, 2015. Saliva from nymph and adult females of  
855 *Haemaphysalis longicornis*: a proteomic study. Parasit. Vectors 8, y.
- 856 35. Oliveira, C.J., Anatriello, E., de Miranda-Santos, I.K., Francischetti, I.M., Sa-Nunes, A.,  
857 Ferreira, B.R., Ribeiro, J.M., 2013. Proteome of *Rhipicephalus sanguineus* tick saliva  
858 induced by the secretagogues pilocarpine and dopamine. Ticks Tick Borne Dis. 4, 469-  
859 477.
- 860 36. Mudenda, L., Pierle, S.A., Turse, J.E., Scoles, G.A., Purvine, S.O., Nicora, C.D., Clauss,  
861 T.R., Ueti, M.W., Brown, W.C., Brayton, K.A., 2014. Proteomics informed by  
862 transcriptomics identifies novel secreted proteins in *Dermacentor andersoni* saliva. Int. J.  
863 Parasitol. 44, 1029-1037.
- 864 37. Diaz-Martin, V., Manzano-Roman, R., Oleaga, A., Encinas-Grandes, A., Perez-Sanchez,  
865 R., 2013. Cloning and characterization of a plasminogen-binding enolase from the saliva  
866 of the argasid tick *Ornithodoros moubata*. Vet. Parasitol. 191, 301-314.
- 867 38. Tirloni, L., Kim, T.K., Pinto, A.F.M., Yates, J.R.,3rd, da Silva Vaz, I.,Jr, Mulenga, A.,  
868 2017. Tick-Host Range Adaptation: Changes in Protein Profiles in Unfed Adult *Ixodes*  
869 *scapularis* and *Amblyomma americanum* Saliva Stimulated to Feed on Different Hosts.  
870 Front. Cell. Infect. Microbiol. 7, 517.
- 871 39. Mulenga, A., Kim, T.K., Ibelli, A.M., 2013a. Deorphanization and target validation of  
872 cross-tick species conserved novel *Amblyomma americanum* tick saliva protein. Int. J.  
873 Parasitol. 43, 439-451.
- 874 40. Kim, T.K., Curran, J., Mulenga, A., 2014. Dual silencing of long and short *Amblyomma*  
875 *americanum* acidic chitinase forms weakens the tick cement cone stability. J. Exp. Biol.  
876 217, 3493-3503.
- 877 41. Shevchenko, A., Wilm, M., Vorm, O., Mann, M., 1996. Mass spectrometric sequencing  
878 of proteins silver-stained polyacrylamide gels. Anal. Chem. 68, 850-858.
- 879 42. Porter, L., Radulovic, Z., Kim, T., Braz, G.R., Da Silva Vaz, I.,Jr, Mulenga, A., 2015.  
880 Bioinformatic analyses of male and female *Amblyomma americanum* tick expressed  
881 serine protease inhibitors (serpins). Ticks Tick Borne Dis.
- 882 43. Karim, S., Singh, P., Ribeiro, J.M., 2011. A deep insight into the sialotranscriptome of  
883 the gulf coast tick, *Amblyomma maculatum*. PLoS One 6, e28525.
- 884 44. Rawlings, N.D., Barrett, A.J., Bateman, A., 2012. MEROPS: the database of proteolytic  
885 enzymes, their substrates and inhibitors. Nucleic Acids Res. 40, 343.
- 886 45. Ashburner, M., Ball, C.A., Blake, J.A., Botstein, D., Butler, H., Cherry, J.M., Davis,  
887 A.P., Dolinski, K., Dwight, S.S., Eppig, J.T., Harris, M.A., Hill, D.P., Issel-Tarver, L.,  
888 Kasarskis, A., Lewis, S., Matese, J.C., Richardson, J.E., Ringwald, M., Rubin, G.M.,  
889 Sherlock, G., 2000. Gene ontology: tool for the unification of biology. The Gene  
890 Ontology Consortium. Nat. Genet. 25, 25-29.

- 891 46. Marchler-Bauer, A., Derbyshire, M.K., Gonzales, N.R., Lu, S., Chitsaz, F., Geer, L.Y.,  
892 Geer, R.C., He, J., Gwadz, M., Hurwitz, D.I., Lanczycki, C.J., Lu, F., Marchler, G.H.,  
893 Song, J.S., Thanki, N., Wang, Z., Yamashita, R.A., Zhang, D., Zheng, C., Bryant, S.H.,  
894 2015. CDD: NCBI's conserved domain database. *Nucleic Acids Res.* 43, 222.
- 895 47. Tatusov, R.L., Fedorova, N.D., Jackson, J.D., Jacobs, A.R., Kiryutin, B., Koonin, E.V.,  
896 Krylov, D.M., Mazumder, R., Mekhedov, S.L., Nikolskaya, A.N., Rao, B.S., Smirnov, S.,  
897 Sverdlov, A.V., Vasudevan, S., Wolf, Y.I., Yin, J.J., Natale, D.A., 2003. The COG  
898 database: an updated version includes eukaryotes. *BMC Bioinformatics* 4, 41.
- 899 48. Bateman, A., Birney, E., Cerruti, L., Durbin, R., Etwiller, L., Eddy, S.R., Griffiths-Jones,  
900 S., Howe, K.L., Marshall, M., Sonnhammer, E.L., 2002. The Pfam protein families  
901 database. *Nucleic Acids Res.* 30, 276-280.
- 902 49. Schultz, J., Copley, R.R., Doerks, T., Ponting, C.P., Bork, P., 2000. SMART: a web-  
903 based tool for the study of genetically mobile domains. *Nucleic Acids Res.* 28, 231-234.
- 904 50. Fu, L., Niu, B., Zhu, Z., Wu, S., Li, W., 2012. CD-HIT: accelerated for clustering the  
905 next-generation sequencing data. *Bioinformatics* 28, 3150-3152.
- 906 51. McDonald, W.H., Tabb, D.L., Sadygov, R.G., MacCoss, M.J., Venable, J., Graumann, J.,  
907 Johnson, J.R., Cociorva, D., Yates, J.R., 3rd, 2004. MS1, MS2, and SQT-three unified,  
908 compact, and easily parsed file formats for the storage of shotgun proteomic spectra and  
909 identifications. *Rapid Commun. Mass Spectrom.* 18, 2162-2168.
- 910 52. Xu, T., Park, S.K., Venable, J.D., Wohlschlegel, J.A., Diedrich, J.K., Cociorva, D., Lu,  
911 B., Liao, L., Hewel, J., Han, X., Wong, C.C., Fonslow, B., Delahunty, C., Gao, Y., Shah,  
912 H., Yates, J.R., 3rd, 2015. ProLuCID: An improved SEQUEST-like algorithm with  
913 enhanced sensitivity and specificity. *J. Proteomics* .
- 914 53. Florens, L., Carozza, M.J., Swanson, S.K., Fournier, M., Coleman, M.K., Workman, J.L.,  
915 Washburn, M.P., 2006. Analyzing chromatin remodeling complexes using shotgun  
916 proteomics and normalized spectral abundance factors. *Methods* 40, 303-311.
- 917 54. Paoletti, A.C., Parmely, T.J., Tomomori-Sato, C., Sato, S., Zhu, D., Conaway, R.C.,  
918 Conaway, J.W., Florens, L., Washburn, M.P., 2006. Quantitative proteomic analysis of  
919 distinct mammalian Mediator complexes using normalized spectral abundance factors.  
920 *Proc. Natl. Acad. Sci. U. S. A.* 103, 18928-18933.
- 921 55. Zhu, W., Smith, J.W., Huang, C.M., 2010. Mass spectrometry-based label-free  
922 quantitative proteomics. *J. Biomed. Biotechnol.* 2010, 840518.
- 923 56. Warnes, G.R., Bolker, B., Bonebakker, L., Gentleman, R., Huber, W., Liaw, A., Lumley,  
924 T., Maechler, M., Magnusson, A., Moeller, S., Schwartz, M., Venables, B., 2013. Various  
925 R programming tools for plotting data. *The Comprehensive R Archive Network*.
- 926 57. McSwain, J.L., Essenberg, R.C., Sauer, J.R., 1982. Protein changes in the salivary glands  
927 of the female lone star tick, *Amblyomma americanum*, during feeding. *J. Parasitol.* 68,  
928 100-106.
- 929 58. Tatchell, R.J., 1967. A modified method for obtaining tick oral secretion. *J. Parasitol.* 53,  
930 1106-1107.
- 931 59. Karim, S., Ribeiro, J.M., 2015. An Insight into the Sialome of the Lone Star Tick,  
932 *Amblyomma americanum*, with a Glimpse on Its Time Dependent Gene Expression.  
933 *PLoS One* 10, e0131292.
- 934 60. Ribeiro, J.M., Alarcon-Chaidez, F., Francischetti, I.M., Mans, B.J., Mather, T.N.,  
935 Valenzuela, J.G., Wikel, S.K., 2006. An annotated catalog of salivary gland transcripts  
936 from *Ixodes scapularis* ticks. *Insect Biochem. Mol. Biol.* 36, 111-129.

- 937 61. Valenzuela, J.G., Francischetti, I.M., Pham, V.M., Garfield, M.K., Mather, T.N., Ribeiro,  
938 J.M., 2002. Exploring the sialome of the tick *Ixodes scapularis*. *J. Exp. Biol.* 205, 2843-  
939 2864.
- 940 62. Porter, L.M., Radulovic, Z.M., Mulenga, A., 2017. A repertoire of protease inhibitor  
941 families in *Amblyomma americanum* and other tick species: inter-species comparative  
942 analyses. *Parasit. Vectors* 10, 1.
- 943 63. Blisnick, A.A., Foulon, T., Bonnet, S.I., 2017. Serine Protease Inhibitors in Ticks: An  
944 Overview of Their Role in Tick Biology and Tick-Borne Pathogen Transmission. *Front.*  
945 *Cell. Infect. Microbiol.* 7, 199.
- 946 64. Chmelar, J., Kotal, J., Langhansova, H., Kotsyfakis, M., 2017. Protease Inhibitors in Tick  
947 Saliva: The Role of Serpins and Cystatins in Tick-host-Pathogen Interaction. *Front. Cell.*  
948 *Infect. Microbiol.* 7, 216.
- 949 65. Law, R.H., Zhang, Q., McGowan, S., Buckle, A.M., Silverman, G.A., Wong, W.,  
950 Rosado, C.J., Langendorf, C.G., Pike, R.N., Bird, P.I., Whisstock, J.C., 2006. An  
951 overview of the serpin superfamily. *Genome Biol.* 7, 216. Epub 2006 May 30.
- 952 66. Mulenga, A., Khumthong, R., Blandon, M.A., 2007a. Molecular and expression analysis  
953 of a family of the *Amblyomma americanum* tick Lospins. *J. Exp. Biol.* 210, 3188-3198.
- 954 67. Mulenga, A., Khumthong, R., Chalaire, K.C., 2009. *Ixodes scapularis* tick serine  
955 proteinase inhibitor (serpin) gene family; annotation and transcriptional analysis. *BMC*  
956 *Genomics* 10, 217.
- 957 68. Mulenga, A., Sugino, M., Nakajim, M., Sugimoto, C., Onuma, M., 2001. Tick-Encoded  
958 serine proteinase inhibitors (serpins); potential target antigens for tick vaccine  
959 development. *J. Vet. Med. Sci.* 63, 1063-1069.
- 960 69. Kim, T.K., Tirloni, L., Radulovic, Z., Lewis, L., Bakshi, M., Hill, C., da Silva Vaz, I., Jr,  
961 Logullo, C., Termignoni, C., Mulenga, A., 2015. Conserved *Amblyomma americanum*  
962 tick Serpin19, an inhibitor of blood clotting factors Xa and XIa, trypsin and plasmin, has  
963 anti-haemostatic functions. *Int. J. Parasitol.* 45, 613-627.
- 964 70. Mulenga, A., Kim, T., Ibelli, A.M., 2013a. *Amblyomma americanum* tick saliva serine  
965 protease inhibitor 6 is a cross-class inhibitor of serine proteases and papain-like cysteine  
966 proteases that delays plasma clotting and inhibits platelet aggregation. *Insect Mol. Biol.*  
967 22, 306-319.
- 968 71. Karim, S., Miller, N.J., Valenzuela, J., Sauer, J.R., Mather, T.N., 2005. RNAi-mediated  
969 gene silencing to assess the role of synaptobrevin and cystatin in tick blood feeding.  
970 *Biochem. Biophys. Res. Commun.* 334, 1336-1342.
- 971 72. Wang, X., Shaw, D.K., Sakhon, O.S., Snyder, G.A., Sundberg, E.J., Santambrogio, L.,  
972 Sutterwala, F.S., Dumler, J.S., Shirey, K.A., Perkins, D.J., Richard, K., Chagas, A.C.,  
973 Calvo, E., Kopecky, J., Kotsyfakis, M., Pedra, J.H.F., 2016. The Tick Protein Sialostatin  
974 L2 Binds to Annexin A2 and Inhibits NLRC4-Mediated Inflammasome Activation.  
975 *Infect. Immun.* 84, 1796-1805.
- 976 73. Zavasnik-Bergant, T., Vidmar, R., Sekirnik, A., Fonovic, M., Salat, J., Grunclova, L.,  
977 Kopacek, P., Turk, B., 2017. Salivary Tick Cystatin OmC2 Targets Lysosomal  
978 Cathepsins S and C in Human Dendritic Cells. *Front. Cell. Infect. Microbiol.* 7, 288.
- 979 74. Sa-Nunes, A., Bafica, A., Antonelli, L.R., Choi, E.Y., Francischetti, I.M., Andersen, J.F.,  
980 Shi, G.P., Chavakis, T., Ribeiro, J.M., Kotsyfakis, M., 2009. The immunomodulatory  
981 action of sialostatin L on dendritic cells reveals its potential to interfere with  
982 autoimmunity. *J. Immunol.* 182, 7422-7429.

- 983 75. Wang, Y., Zhou, Y., Gong, H., Cao, J., Zhang, H., Li, X., Zhou, J., 2015. Functional  
984 characterization of a cystatin from the tick *Rhipicephalus haemaphysaloides*. *Parasit.*  
985 *Vectors* 8, 5.
- 986 76. Wei, N., Lin, Z., Xu, Z., Gong, H., Zhang, H., Zhou, Y., Cao, J., Li, G., Zhou, J., 2019.  
987 Immunosuppressive effects of tick protein RHcyst-1 on murine bone marrow-derived  
988 dendritic cells. *Parasit. Vectors* 12, 1.
- 989 77. Kopacek, P., Weise, C., Saravanan, T., Vitova, K., Grubhoffer, L., 2000. Characterization  
990 of an alpha-macroglobulin-like glycoprotein isolated from the plasma of the soft tick  
991 *Ornithodoros moubata*. *Eur. J. Biochem.* 267, 465-475.
- 992 78. Buresova, V., Hajdusek, O., Franta, Z., Sojka, D., Kopacek, P., 2009. IrAM-An alpha2-  
993 macroglobulin from the hard tick *Ixodes ricinus*: characterization and function in  
994 phagocytosis of a potential pathogen *Chryseobacterium indologenes*. *Dev. Comp.*  
995 *Immunol.* 33, 489-498.
- 996 79. Mulenga, A., Erikson, K., 2011. A snapshot of the *Ixodes scapularis* degradome. *Gene*  
997 482, 78-93.
- 998 80. Fox, J.W., Serrano, S.M., 2005. Structural considerations of the snake venom  
999 metalloproteinases, key members of the M12 reprotolysin family of metalloproteinases.  
1000 *Toxicon* 45, 969-985.
- 1001 81. Kini, R.M., 2006. Anticoagulant proteins from snake venoms: structure, function and  
1002 mechanism. *Biochem. J.* 397, 377-387.
- 1003 82. Decrem, Y., Mariller, M., Lahaye, K., Blasioli, V., Beaufays, J., Zouaoui Boudjeltia, K.,  
1004 Vanhaeverbeek, M., Cerutti, M., Brossard, M., Vanhamme, L., Godfroid, E., 2008. The  
1005 impact of gene knock-down and vaccination against salivary metalloproteases on blood  
1006 feeding and egg laying by *Ixodes ricinus*. *Int. J. Parasitol.* 38, 549-560.
- 1007 83. Francischetti, I.M., Mather, T.N., Ribeiro, J.M., 2003. Cloning of a salivary gland  
1008 metalloprotease and characterization of gelatinase and fibrin(ogen)lytic activities in the  
1009 saliva of the Lyme disease tick vector *Ixodes scapularis*. *Biochem. Biophys. Res.*  
1010 *Commun.* 305, 869-875.
- 1011 84. Turner, A.J., 2004. *Handbook of Proteolytic Enzymes* 1.
- 1012 85. Ewen, D., Clarke, S.L., Smith, J.R., Berger, C., Salmon, G., Trevethick, M., Shute, J.K.,  
1013 2010. The role of protease-activated receptors PAR-1 and PAR-2 in the repair of 16HBE  
1014 14o(-) epithelial cell monolayers in vitro. *Clin. Exp. Allergy* 40, 435-449.
- 1015 86. Cattaruzza, F., Amadesi, S., Carlsson, J.F., Murphy, J.E., Lyo, V., Kirkwood, K.,  
1016 Cottrell, G.S., Bogyo, M., Knecht, W., Bunnett, N.W., 2014. Serine proteases and  
1017 protease-activated receptor 2 mediate the proinflammatory and algescic actions of diverse  
1018 stimulants. *Br. J. Pharmacol.* 171, 3814-3826.
- 1019 87. Sojka, D., Francischetti, I.M., Calvo, E., Kotsyfakis, M., 2011. Cysteine proteases from  
1020 bloodfeeding arthropod ectoparasites. *Adv. Exp. Med. Biol.* 712, 177-191.
- 1021 88. Sun, Y., He, L., Yu, L., Guo, J., Nie, Z., Liu, Q., Zhao, J., 2019. Cathepsin L-a novel  
1022 cysteine protease from *Haemaphysalis flava* Neumann, 1897. *Parasitol. Res.*
- 1023 89. Zhang, T.T., Qiu, Z.X., Li, Y., Wang, W.Y., Li, M.M., Guo, P., Liu, J.Z., 2019. The  
1024 mRNA expression and enzymatic activity of three enzymes during embryonic  
1025 development of the hard tick *Haemaphysalis longicornis*. *Parasit. Vectors* 12, 8.
- 1026 90. Tsuji, N., Miyoshi, T., Battsetseg, B., Matsuo, T., Xuan, X., Fujisaki, K., 2008. A  
1027 cysteine protease is critical for *Babesia* spp. transmission in *Haemaphysalis* ticks. *PLoS*  
1028 *Pathog.* 4, e1000062.

- 1029 91. Xavier, M.A., Tirloni, L., Torquato, R., Tanaka, A., Pinto, A.F.M., Diedrich, J.K., Yates,  
1030 J.R.,3rd, da Silva Vaz, I.,Jr, Seixas, A., Termignoni, C., 2019. Blood anticlotting activity  
1031 of a *Rhipicephalus microplus* cathepsin L-like enzyme. *Biochimie* 163, 12-20.
- 1032 92. Cwiklinski, K., de la Torre-Escudero, E., Trelis, M., Bernal, D., Dufresne, P.J., Brennan,  
1033 G.P., O'Neill, S., Tort, J., Paterson, S., Marcilla, A., Dalton, J.P., Robinson, M.W., 2015.  
1034 The Extracellular Vesicles of the Helminth Pathogen, *Fasciola hepatica*: Biogenesis  
1035 Pathways and Cargo Molecules Involved in Parasite Pathogenesis. *Mol. Cell. Proteomics*  
1036 14, 3258-3273.
- 1037 93. Berasain, P., Carmona, C., Frangione, B., Dalton, J.P., Goñi, F., 2000. *Fasciola hepatica*:  
1038 Parasite-Secreted Proteinases Degrade All Human IgG Subclasses: Determination of the  
1039 Specific Cleavage Sites and Identification of the Immunoglobulin Fragments Produced.  
1040 *Exp Parasitol.* 94, 99-110.
- 1041 94. Robinson, M.W., Corvo, I., Jones, P.M., George, A.M., Padula, M.P., To, J., Cancela, M.,  
1042 Rinaldi, G., Tort, J.F., Roche, L., Dalton, J.P., 2011. Collagenolytic activities of the  
1043 major secreted cathepsin L peptidases involved in the virulence of the helminth pathogen,  
1044 *Fasciola hepatica*. *PLoS Negl Trop. Dis.* 5, e1012.
- 1045 95. Akov, S., 1982. Blood Digestion in Ticks. pp 197-212. Obenchain, F.D and Galun R.,  
1046 *Physiology of Ticks*.
- 1047 96. Boldbaatar, D., Sikalizyo Sikasunge, C., Battsetseg, B., Xuan, X., Fujisaki, K., 2006.  
1048 Molecular cloning and functional characterization of an aspartic protease from the hard  
1049 tick *Haemaphysalis longicornis*. *Insect Biochem. Mol. Biol.* 36, 25-36.
- 1050 97. Logullo, C., Vaz Ida, S., Sorgine, M.H., Paiva-Silva, G.O., Faria, F.S., Zingali, R.B., De  
1051 Lima, M.F., Abreu, L., Oliveira, E.F., Alves, E.W., Masuda, H., Gonzales, J.C., Masuda,  
1052 A., Oliveira, P.L., 1998. Isolation of an aspartic proteinase precursor from the egg of a  
1053 hard tick, *Boophilus microplus*. *Parasitology* 116 ( Pt 6), 525-532.
- 1054 98. Sorgine, M.H., Logullo, C., Zingali, R.B., Paiva-Silva, G.O., Juliano, L., Oliveira, P.L.,  
1055 2000. A heme-binding aspartic proteinase from the eggs of the hard tick *Boophilus*  
1056 *microplus*. *J. Biol. Chem.* 275, 28659-28665.
- 1057 99. Paesen, G.C., Adams, P.L., Harlos, K., Nuttall, P.A., Stuart, D.I., 1999. Tick histamine-  
1058 binding proteins: isolation, cloning, and three-dimensional structure. *Mol. Cell* 3, 661-  
1059 671.
- 1060 100. Fluckinger, M., Haas, H., Merschak, P., Glasgow, B.J., Redl, B., 2004. Human  
1061 tear lipocalin exhibits antimicrobial activity by scavenging microbial siderophores.  
1062 *Antimicrob. Agents Chemother.* 48, 3367-3372.
- 1063 101. Chan, Y.R., Liu, J.S., Pociask, D.A., Zheng, M., Mietzner, T.A., Berger, T., Mak,  
1064 T.W., Clifton, M.C., Strong, R.K., Ray, P., Kolls, J.K., 2009. Lipocalin 2 is required for  
1065 pulmonary host defense against *Klebsiella* infection. *J. Immunol.* 182, 4947-4956.
- 1066 102. Cho, K.W., Zhou, Y., Sheng, L., Rui, L., 2011. Lipocalin-13 regulates glucose  
1067 metabolism by both insulin-dependent and insulin-independent mechanisms. *Mol. Cell.*  
1068 *Biol.* 31, 450-457.
- 1069 103. Ganfornina, M.D., Kayser, H., Sanchez, D., 2000. Lipocalins in Arthropoda:  
1070 Diversification and Functional Explorations. In: Madame Curie Bioscience Database  
1071 [Internet]. Austin (TX): Landes Bioscience .
- 1072 104. Smathers, R.L., Petersen, D.R., 2011. The human fatty acid-binding protein  
1073 family: evolutionary divergences and functions. *Hum. Genomics* 5, 170-191.

- 1074 105. Koreny, L., Obornik, M., Lukes, J., 2013. Make it, take it, or leave it: heme  
1075 metabolism of parasites. *PLoS Pathog.* 9, e1003088.
- 1076 106. Braz, G.R., Coelho, H.S., Masuda, H., Oliveira, P.L., 1999. A missing metabolic  
1077 pathway in the cattle tick *Boophilus microplus*. *Curr. Biol.* 9, 703-706.
- 1078 107. Perner, J., Sobotka, R., Sima, R., Konvickova, J., Sojka, D., Oliveira, P.L.,  
1079 Hajdusek, O., Kopacek, P., 2016. Acquisition of exogenous haem is essential for tick  
1080 reproduction. *Elife* 5, 10.7554/eLife.12318.
- 1081 108. Toh, S.Q., Glanfield, A., Gobert, G.N., Jones, M.K., 2010. Heme and blood-  
1082 feeding parasites: friends or foes? *Parasit. Vectors* 3, 108.
- 1083 109. Lara, F.A., Lins, U., Bechara, G.H., Oliveira, P.L., 2005. Tracing heme in a living  
1084 cell: hemoglobin degradation and heme traffic in digest cells of the cattle tick *Boophilus*  
1085 *microplus*. *J. Exp. Biol.* 208, 3093-3101.
- 1086 110. Maya-Monteiro, C.M., Daffre, S., Logullo, C., Lara, F.A., Alves, E.W., Capurro,  
1087 M.L., Zingali, R., Almeida, I.C., Oliveira, P.L., 2000. HeLp, a heme lipoprotein from the  
1088 hemolymph of the cattle tick, *Boophilus microplus*. *J. Biol. Chem.* 275, 36584-36589.
- 1089 111. Gudderra, N.P., Sonenshine, D.E., Apperson, C.S., Roe, R.M., 2002a.  
1090 Hemolymph proteins in ticks. *Journal of Insect Physiology* 48, 269-278.
- 1091 112. Gudderra, N.P., Sonenshine, D.E., Apperson, C.S., Roe, R.M., 2002b. Tissue  
1092 distribution and characterization of predominant hemolymph carrier proteins from  
1093 *Dermacentor variabilis* and *Ornithodoros parkeri*. *J. Insect Physiol.* 48, 161-170.
- 1094 113. Dutra, F.F., Bozza, M.T., 2014. Heme on innate immunity and inflammation.  
1095 *Front. Pharmacol.* 5, 115.
- 1096 114. Maya-Monteiro, C.M., Alves, L.R., Pinhal, N., Abdalla, D.S., Oliveira, P.L.,  
1097 2004. HeLp, a heme-transporting lipoprotein with an antioxidant role. *Insect Biochem.*  
1098 *Mol. Biol.* 34, 81-88.
- 1099 115. Seixas, A., Alzugaray, M.F., Tirloni, L., Parizi, L.F., Pinto, A.F.M., Githaka,  
1100 N.W., Konnai, S., Ohashi, K., Yates Iii, J.R., Termignoni, C., da Silva Vaz, I., Jr, 2018.  
1101 Expression profile of *Rhipicephalus microplus* vitellogenin receptor during oogenesis.  
1102 *Ticks Tick Borne Dis.* 9, 72-81.
- 1103 116. Hussein, H.E., Johnson, W.C., Taus, N.S., Suarez, C.E., Scoles, G.A., Ueti,  
1104 M.W., 2019. Silencing expression of the *Rhipicephalus microplus* vitellogenin receptor  
1105 gene blocks *Babesia bovis* transmission and interferes with oocyte maturation. *Parasit.*  
1106 *Vectors* 12, 1.
- 1107 117. Narasimhan, S., Deponte, K., Marcantonio, N., Liang, X., Royce, T.E., Nelson,  
1108 K.F., Booth, C.J., Koski, B., Anderson, J.F., Kantor, F., Fikrig, E., 2007. Immunity  
1109 against *Ixodes scapularis* salivary proteins expressed within 24 hours of attachment  
1110 thwarts tick feeding and impairs *Borrelia* transmission. *PLoS One* 2, e451.
- 1111 118. Rojkind, M., Dominguez-Rosales, J.A., Nieto, N., Greenwel, P., 2002. Role of  
1112 hydrogen peroxide and oxidative stress in healing responses. *Cell Mol. Life Sci.* 59,  
1113 1872-1891.
- 1114 119. Adamson, S., Browning, R., Singh, P., Nobles, S., Villarreal, A., Karim, S., 2014.  
1115 Transcriptional activation of antioxidants may compensate for selenoprotein deficiencies  
1116 in *Amblyomma maculatum* (Acari: Ixodidae) injected with selK- or selM-dsRNA. *Insect*  
1117 *Mol. Biol.* 23, 497-510.
- 1118 120. Kumar, D., Budachetri, K., Meyers, V.C., Karim, S., 2016. Assessment of tick  
1119 antioxidant responses to exogenous oxidative stressors and insight into the role of



- 1120 catalase in the reproductive fitness of the Gulf Coast tick, *Amblyomma maculatum*. Insect  
1121 Mol. Biol. 25, 283-294.
- 1122 121. Das, S., Banerjee, G., DePonte, K., Marcantonio, N., Kantor, F.S., Fikrig, E.,  
1123 2001. Salp25D, an *Ixodes scapularis* antioxidant, is 1 of 14 immunodominant antigens in  
1124 engorged tick salivary glands. J. Infect. Dis. 184, 1056-1064.
- 1125 122. Wu, J., Wang, Y., Liu, H., Yang, H., Ma, D., Li, J., Li, D., Lai, R., Yu, H., 2010.  
1126 Two immunoregulatory peptides with antioxidant activity from tick salivary glands. J.  
1127 Biol. Chem. 285, 16606-16613.
- 1128 123. Lewis, L.A., Radulovic, Z.M., Kim, T.K., Porter, L.M., Mulenga, A., 2015.  
1129 Identification of 24h *Ixodes scapularis* immunogenic tick saliva proteins. Ticks Tick  
1130 Borne Dis. 6, 424-434.
- 1131 124. Radulovic, Z.M., Kim, T.K., Porter, L.M., Sze, S.H., Lewis, L., Mulenga, A.,  
1132 2014. A 24-48 h fed *Amblyomma americanum* tick saliva immuno-proteome. BMC  
1133 Genomics 15, 518.
- 1134 125. Kemp, D.H., Stone, B.F., Binnington, K.C., 1982. Tick Attachment and Feeding:  
1135 Role of the Mouthparts, Feeding Apparatus, Salivary Gland Secretions and the Host  
1136 Response, in Obenchain, F., Galun, R. (Eds.), Physiology of Ticks. Pergamon Press Ltd.,  
1137 Oxford, UK, pp. 138-139.
- 1138 126. Binnington, K.C., Kemp, D.H., 1980. Role of tick salivary glands in feeding and  
1139 disease transmission. Adv. Parasitol. 18, 315-339.
- 1140 127. Sonenshine, D.E., 1993. Biology of Ticks. Oxford University Press, Oxford.
- 1141 128. Alekseev, A.N., Burenkova, L.A., Podboronov, V.M., Chunikhin, S.P., 1995.  
1142 Bacteriocidal qualities of ixodid tick (Acarina: Ixodidae) salivary cement plugs and their  
1143 changes under the influence of a viral tick-borne pathogen. J. Med. Entomol. 32, 578-  
1144 582.
- 1145 129. Bishop, R., Lambson, B., Wells, C., Pandit, P., Osaso, J., Nkonge, C., Morzaria,  
1146 S., Musoke, A., Nene, V., 2002. A cement protein of the tick *Rhipicephalus*  
1147 *appendiculatus*, located in the secretory e cell granules of the type III salivary gland  
1148 acini, induces strong antibody responses in cattle. Int. J. Parasitol. 32, 833-842.
- 1149 130. Bullard, R., Allen, P., Chao, C.C., Douglas, J., Das, P., Morgan, S.E., Ching,  
1150 W.M., Karim, S., 2016. Structural characterization of tick cement cones collected from in  
1151 vivo and artificial membrane blood-fed Lone Star ticks (*Amblyomma americanum*). Ticks  
1152 Tick Borne Dis. 7, 880-892.
- 1153 131. Hollmann, T., Kim, T.K., Tirloni, L., Radulovic, Z.M., Pinto, A.F.M., Diedrich,  
1154 J.K., Yates, J.R., 3rd, da Silva Vaz, I., Jr, Mulenga, A., 2017. Identification and  
1155 characterization of proteins in the *Amblyomma americanum* tick cement cone. Int. J.  
1156 Parasitol.
- 1157 132. Mulenga, A., Sugimoto, C., Sako, Y., Ohashi, K., Musoke, A., Shubash, M.,  
1158 Onuma, M., 1999. Molecular characterization of a *Haemaphysalis longicornis* tick  
1159 salivary gland-associated 29-kilodalton protein and its effect as a vaccine against tick  
1160 infestation in rabbits. Infect. Immun. 67, 1652-1658.
- 1161 133. Czolpinska, M., Rurek, M., 2018. Plant Glycine-Rich Proteins in Stress Response:  
1162 An Emerging, Still Prospective Story. Front. Plant. Sci. 9, 302.
- 1163 134. Rossi, D.C.P., Silva, F.D., Daffre, S., Martinez, L.R., Nosanchuk, J.D., Frases, S.,  
1164 Fonseca, F.L., Rodrigues, M.L., Campos, C.B.L., 2011. Effects of microplusin, a copper-  
1165 chelating antimicrobial peptide, against *Cryptococcus neoformans*. femsle 324, 64-72.

- 1166 135. Silva, F.D., Rezende, C.A., Rossi, D.C., Esteves, E., Dyszy, F.H., Schreier, S.,  
1167 Gueiros-Filho, F., Campos, C.B., Pires, J.R., Daffre, S., 2009. Structure and mode of  
1168 action of microplusin, a copper II-chelating antimicrobial peptide from the cattle tick  
1169 *Rhipicephalus (Boophilus) microplus*. J. Biol. Chem. 284, 34735-34746.
- 1170 136. Nakajima, Y., van der Goes van Naters-Yasui, A, Taylor, D., Yamakawa, M.,  
1171 2003. Antibacterial peptide defensin is involved in midgut immunity of the soft tick,  
1172 *Ornithodoros moubata*. Insect Mol. Biol. 11, 611-618.
- 1173 137. Petrou, G., Crouzier, T., 2018. Mucins as multifunctional building blocks of  
1174 biomaterials. Biomater. Sci. 6, 2282-2297.
- 1175 138. Eaton, J.R.O., Alenazi, Y., Singh, K., Davies, G., Geis-Asteggiate, L., Kessler,  
1176 B., Robinson, C.V., Kawamura, A., Bhattacharya, S., 2018. The N-terminal domain of a  
1177 tick evasin is critical for chemokine binding and neutralization and confers specific  
1178 binding activity to other evasins. J. Biol. Chem. 293, 6134-6146.
- 1179 139. Hayward, J., Sanchez, J., Perry, A., Huang, C., Rodriguez Valle, M., Canals, M.,  
1180 Payne, R.J., Stone, M.J., 2017. Ticks from diverse genera encode chemokine-inhibitory  
1181 evasin proteins. J. Biol. Chem. 292, 15670-15680.
- 1182 140. Francischetti, I.M., My Pham, V., Mans, B.J., Andersen, J.F., Mather, T.N., Lane,  
1183 R.S., Ribeiro, J.M., 2005. The transcriptome of the salivary glands of the female western  
1184 black-legged tick *Ixodes pacificus* (Acari: Ixodidae). Insect Biochem. Mol. Biol. 35,  
1185 1142-1161.
- 1186 141. Smith, S.A., Travers, R.J., Morrissey, J.H., 2015. How it all starts: Initiation of  
1187 the clotting cascade. Crit. Rev. Biochem. Mol. Biol. 50, 326-336.
- 1188 142. Konnai, S., Nakajima, C., Imamura, S., Yamada, S., Nishikado, H., Kodama, M.,  
1189 Onuma, M., Ohashi, K., 2009. Suppression of cell proliferation and cytokine expression  
1190 by HL-p36, a tick salivary gland-derived protein of *Haemaphysalis longicornis*.  
1191 Immunology 126, 209-219.
- 1192 143. Mulenga, A., Blandon, M., Khumthong, R., 2007b. The molecular basis of the  
1193 *Amblyomma americanum* tick attachment phase. Exp. Appl. Acarol. 41, 267-287.
- 1194 144. Francischetti, I.M., Sa-Nunes, A., Mans, B.J., Santos, I.M., Ribeiro, J.M., 2009.  
1195 The role of saliva in tick feeding. Front. Biosci. (Landmark Ed) 14, 2051-2088.
- 1196 145. Rock, K.L., Kono, H., 2008. The inflammatory response to cell death. Annu. Rev.  
1197 Pathol. 3, 99-126.
- 1198 146. Zininga, T., Ramatsui, L., Shonhai, A., 2018. Heat Shock Proteins as  
1199 Immunomodulants. Molecules 23, 10.3390/molecules23112846.
- 1200 147. Poirier, A.C., Schmitt, P., Rosa, R.D., Vanhove, A.S., Kieffer-Jaquinod, S.,  
1201 Rubio, T.P., Charriere, G.M., Destoumieux-Garzon, D., 2014. Antimicrobial histones and  
1202 DNA traps in invertebrate immunity: evidences in *Crassostrea gigas*. J. Biol. Chem. 289,  
1203 24821-24831.
- 1204 148. Puente, X.S., Lopez-Otin, C., 2004. A genomic analysis of rat proteases and  
1205 protease inhibitors. Genome Res. 14, 609-622.
- 1206 149. Shah, D., Mital, K., 2018. The Role of Trypsin:Chymotrypsin in Tissue Repair.  
1207 Adv. Ther. 35, 31-42.
- 1208 150. Mosesson, M.W., 2005. Fibrinogen and fibrin structure and functions. J. Thromb.  
1209 Haemost. 3, 1894-1904.

- 1210 151. Abdollahi, M., Ng, T.S., Rezaeizadeh, A., Aamidor, S., Twigg, S.M., Min, D.,  
1211 McLennan, S.V., 2017. Insulin treatment prevents wounding associated changes in tissue  
1212 and circulating neutrophil MMP-9 and NGAL in diabetic rats. PLoS One 12, e0170951.
- 1213 152. Laurens, N., Koolwijk, P., de Maat, M.P., 2006. Fibrin structure and wound  
1214 healing. J. Thromb. Haemost. 4, 932-939.
- 1215 153. Thorsvik, S., van Beelen Granlund, A., Svendsen, T.D., Bakke, I., Royset, E.S.,  
1216 Flo, T.H., Damas, J.K., Ostvik, A.E., Bruland, T., Sandvik, A.K., 2019. Ulcer-associated  
1217 cell lineage expresses genes involved in regeneration and is hallmarked by high  
1218 neutrophil gelatinase-associated lipocalin (NGAL) levels. J. Pathol.
- 1219 154. Smout, M.J., Sotillo, J., Laha, T., Papatpremsiri, A., Rinaldi, G., Pimenta, R.N.,  
1220 Chan, L.Y., Johnson, M.S., Turnbull, L., Whitchurch, C.B., Giacomini, P.R., Moran, C.S.,  
1221 Golledge, J., Daly, N., Sripa, B., Mulvenna, J.P., Brindley, P.J., Loukas, A., 2015.  
1222 Carcinogenic parasite secretes growth factor that accelerates wound healing and  
1223 potentially promotes neoplasia. PLoS Pathog. 11, e1005209.
- 1224 155. Black, W.C., 4th, Piesman, J., 1994. Phylogeny of hard- and soft-tick taxa (Acari:  
1225 Ixodida) based on mitochondrial 16S rDNA sequences. Proc. Natl. Acad. Sci. U. S. A.  
1226 91, 10034-10038.
- 1227 156. Hoogstraal H., Aeschlimann, A., 1982. Tick-host specificity. Mitt. Schweiz.  
1228 Entomol. Ges.
- 1229 157. des Vignes, F., Piesman, J., Heffernan, R., Schulze, T.L., Stafford, K.C., 3rd, Fish,  
1230 D., 2001. Effect of tick removal on transmission of *Borrelia burgdorferi* and *Ehrlichia*  
1231 *phagocytophila* by *Ixodes scapularis* nymphs. J. Infect. Dis. 183, 773-778.
- 1232 158. Ebel, G.D., Kramer, L.D., 2004. Short report: duration of tick attachment required  
1233 for transmission of powassan virus by deer ticks. Am. J. Trop. Med. Hyg. 71, 268-271.
- 1234 159. Perez-Riverol Y, Csordas A, Bai J, Bernal-Llinares M, Hewapathirana S, Kundu  
1235 DJ, Inuganti A, Griss J, Mayer G, Eisenacher M, Pérez E, Uszkoreit J, Pfeuffer J,  
1236 Sachsenberg T, Yilmaz S, Tiwary S, Cox J, Audain E, Walzer M, Jarnuczak AF, Ternent  
1237 T, Brazma A, Vizcaíno JA (2019). The PRIDE database and related tools and resources  
1238 in 2019: improving support for quantification data. Nucleic Acids Res 47(D1):D442-  
1239 D450.

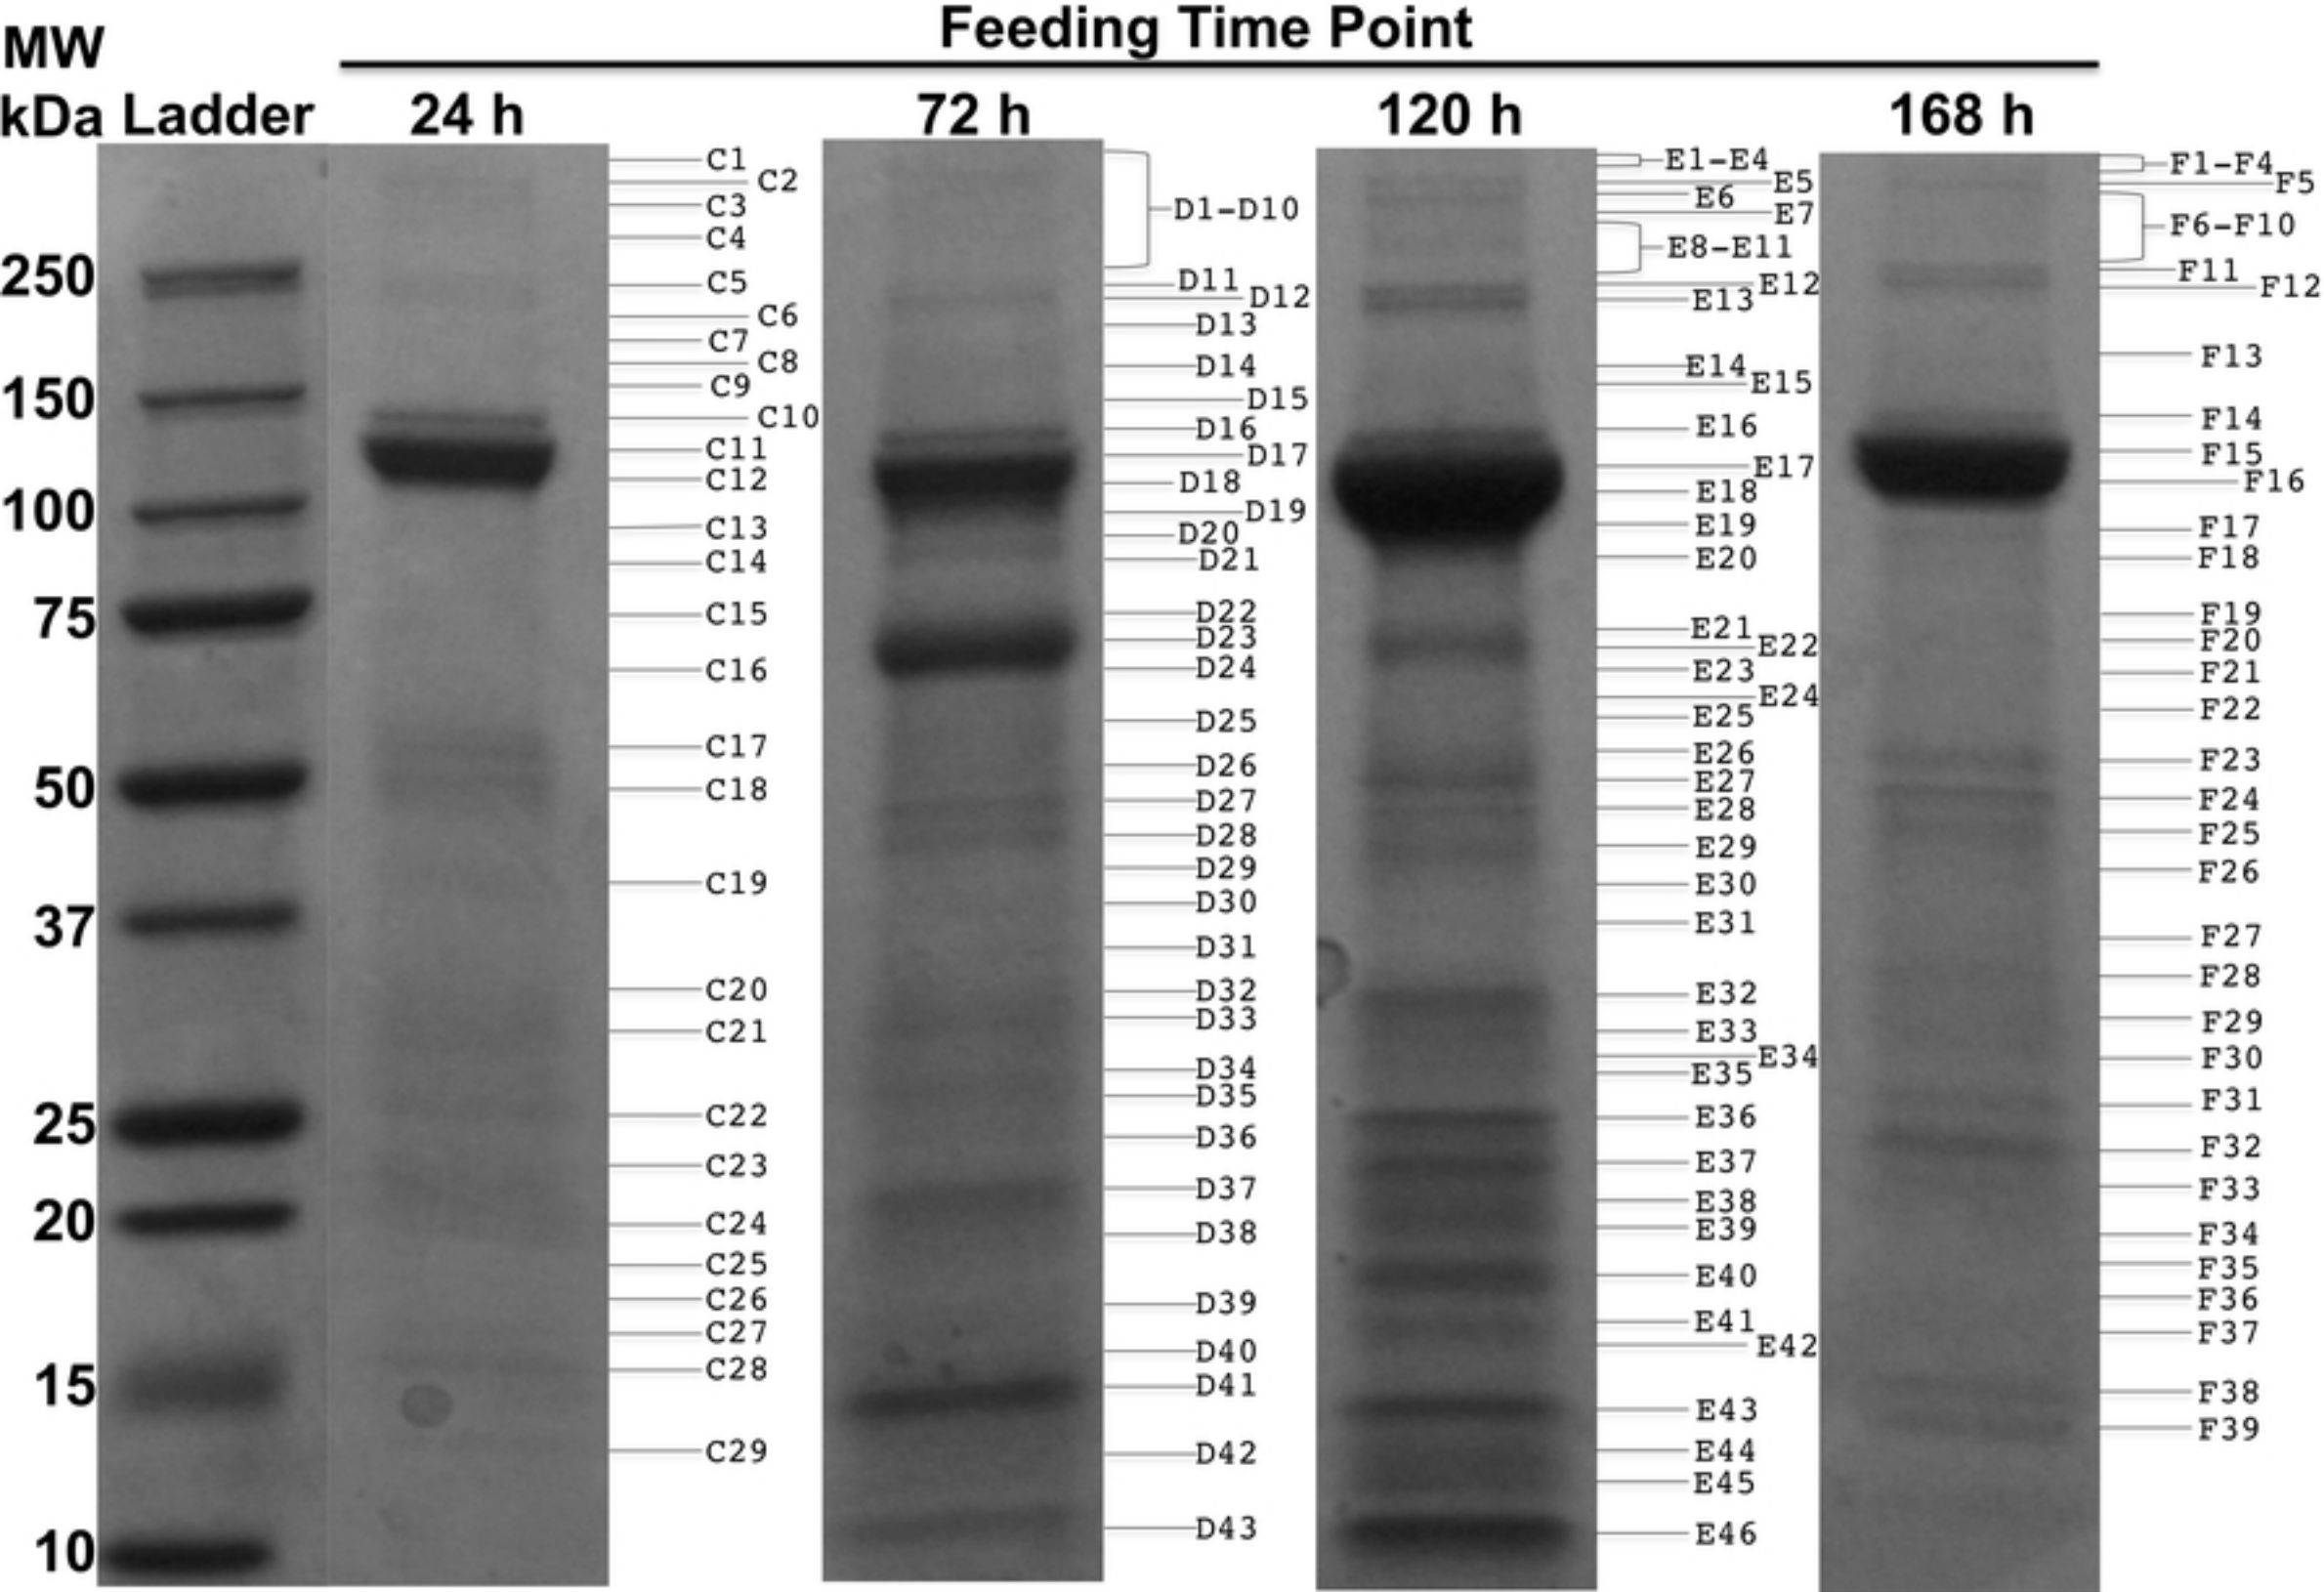

Figure 1

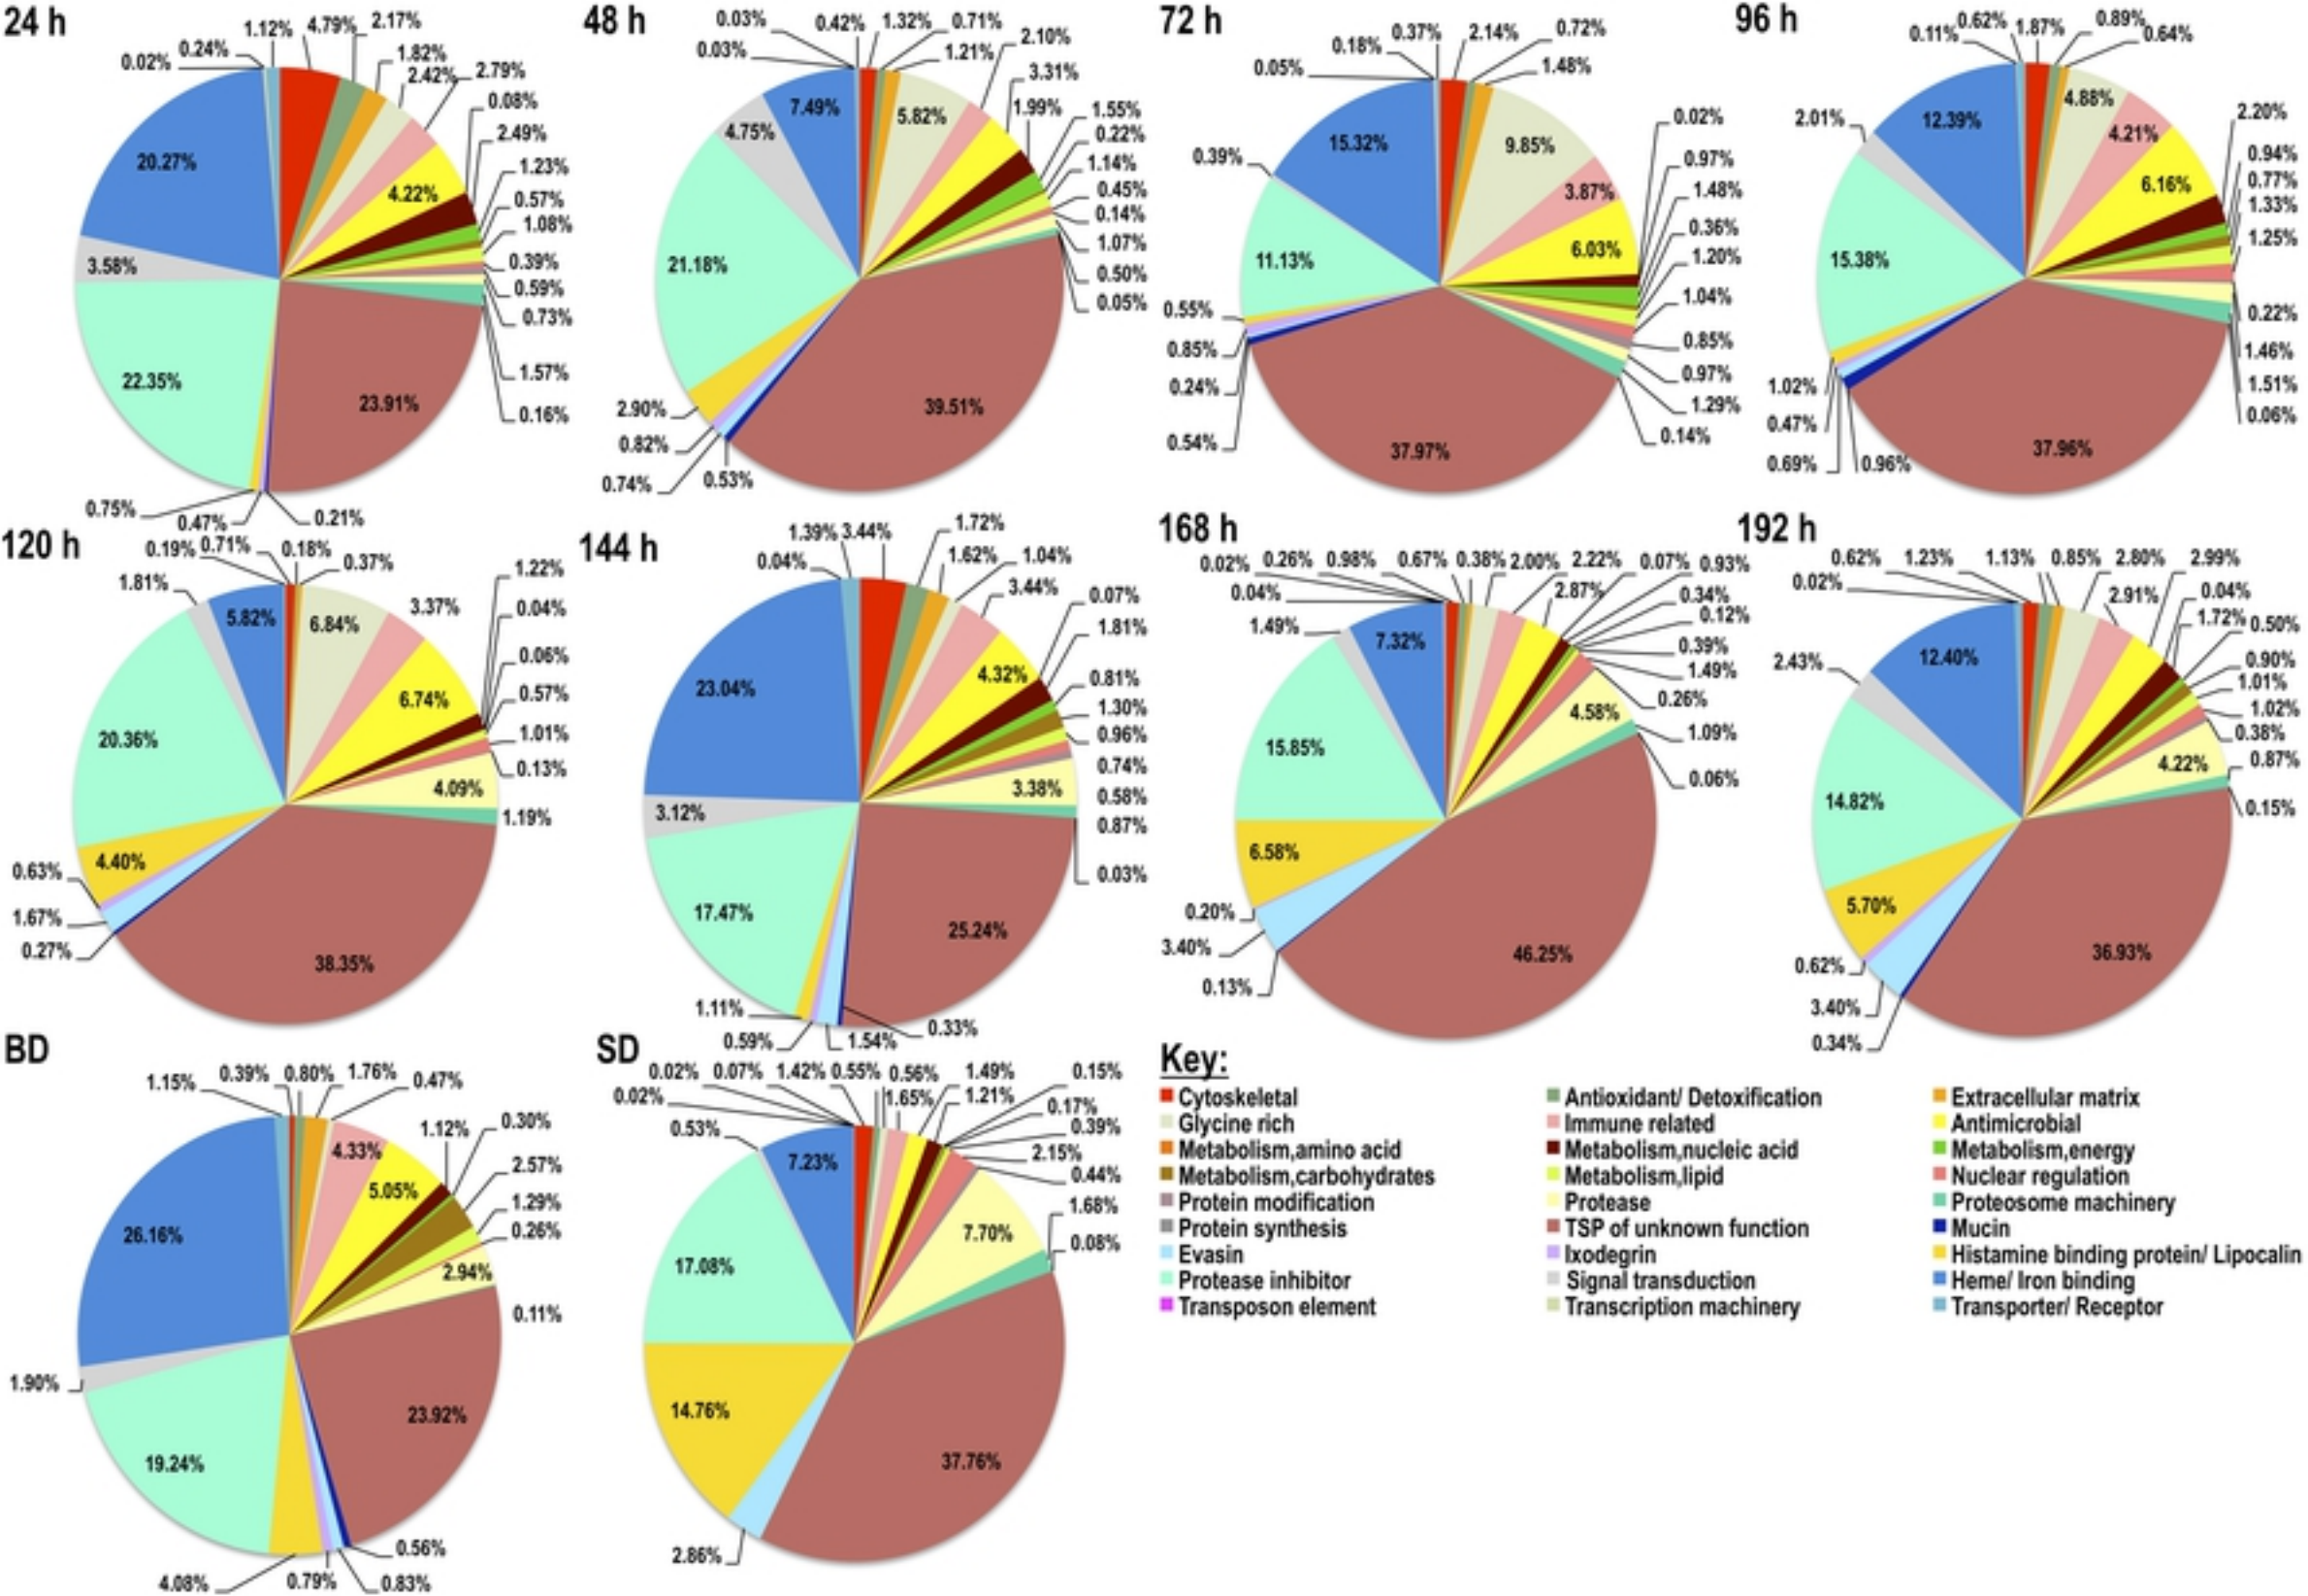

Figure 2A

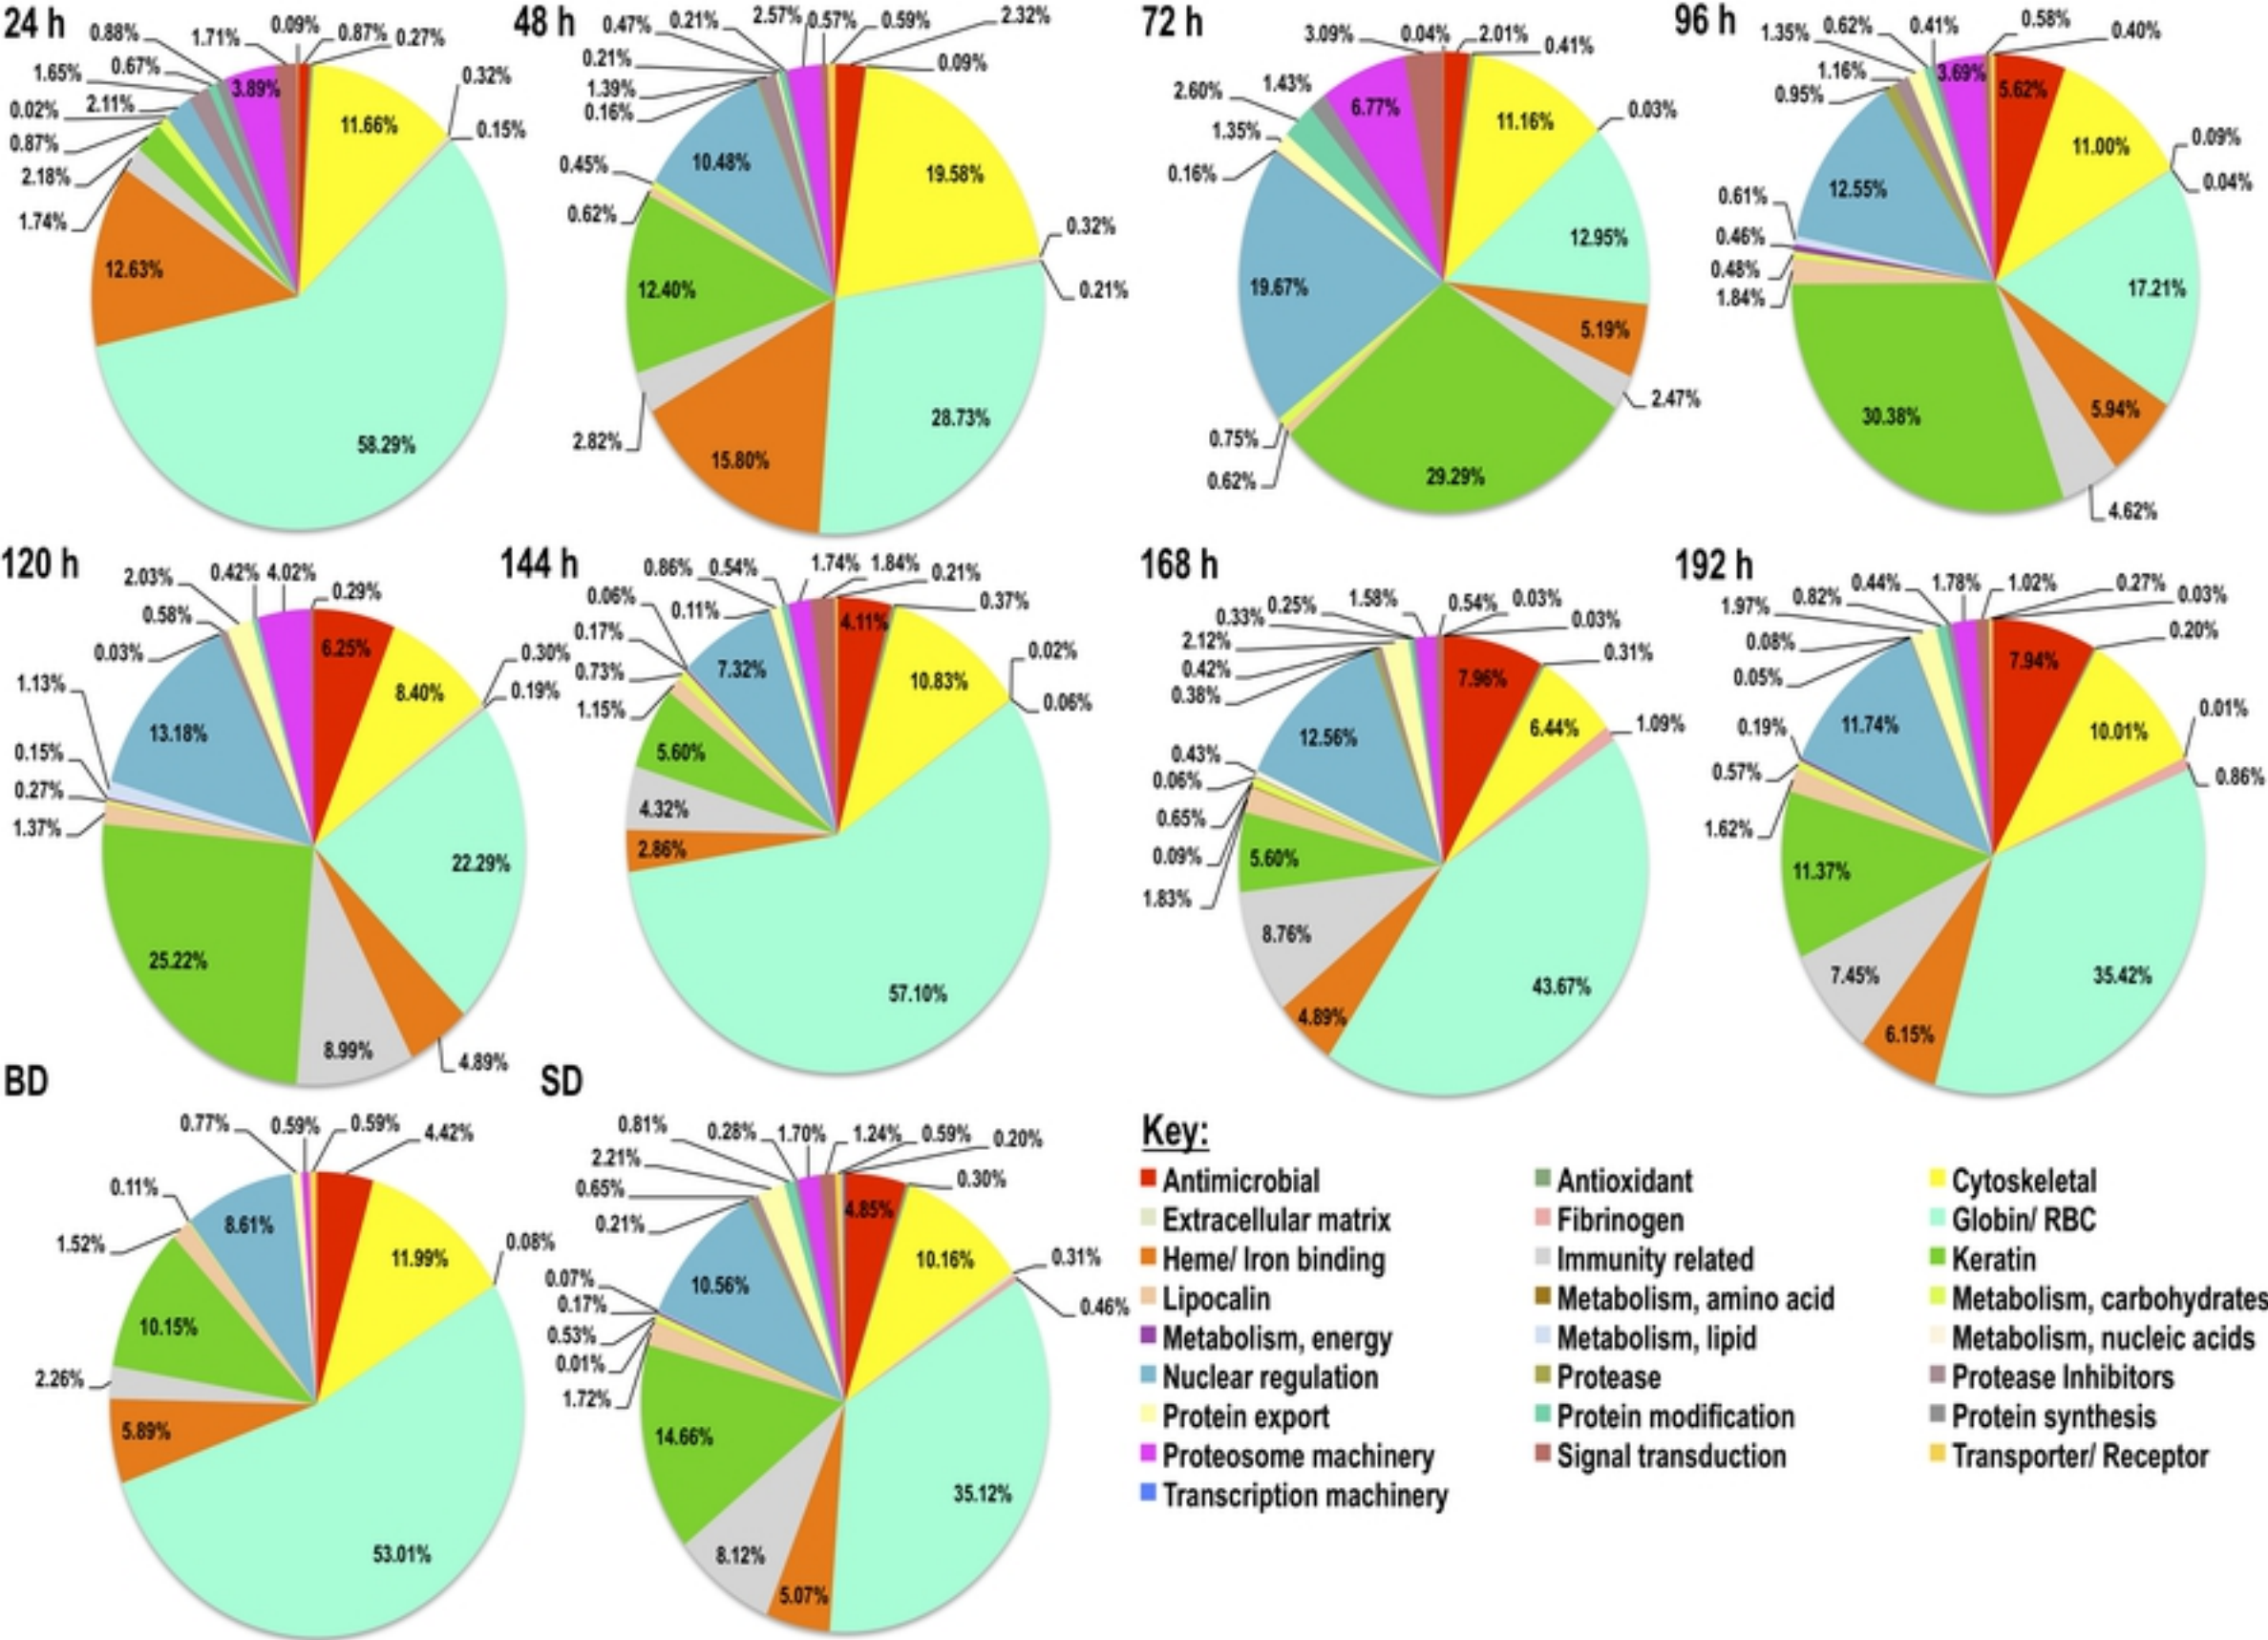

Figure 2B

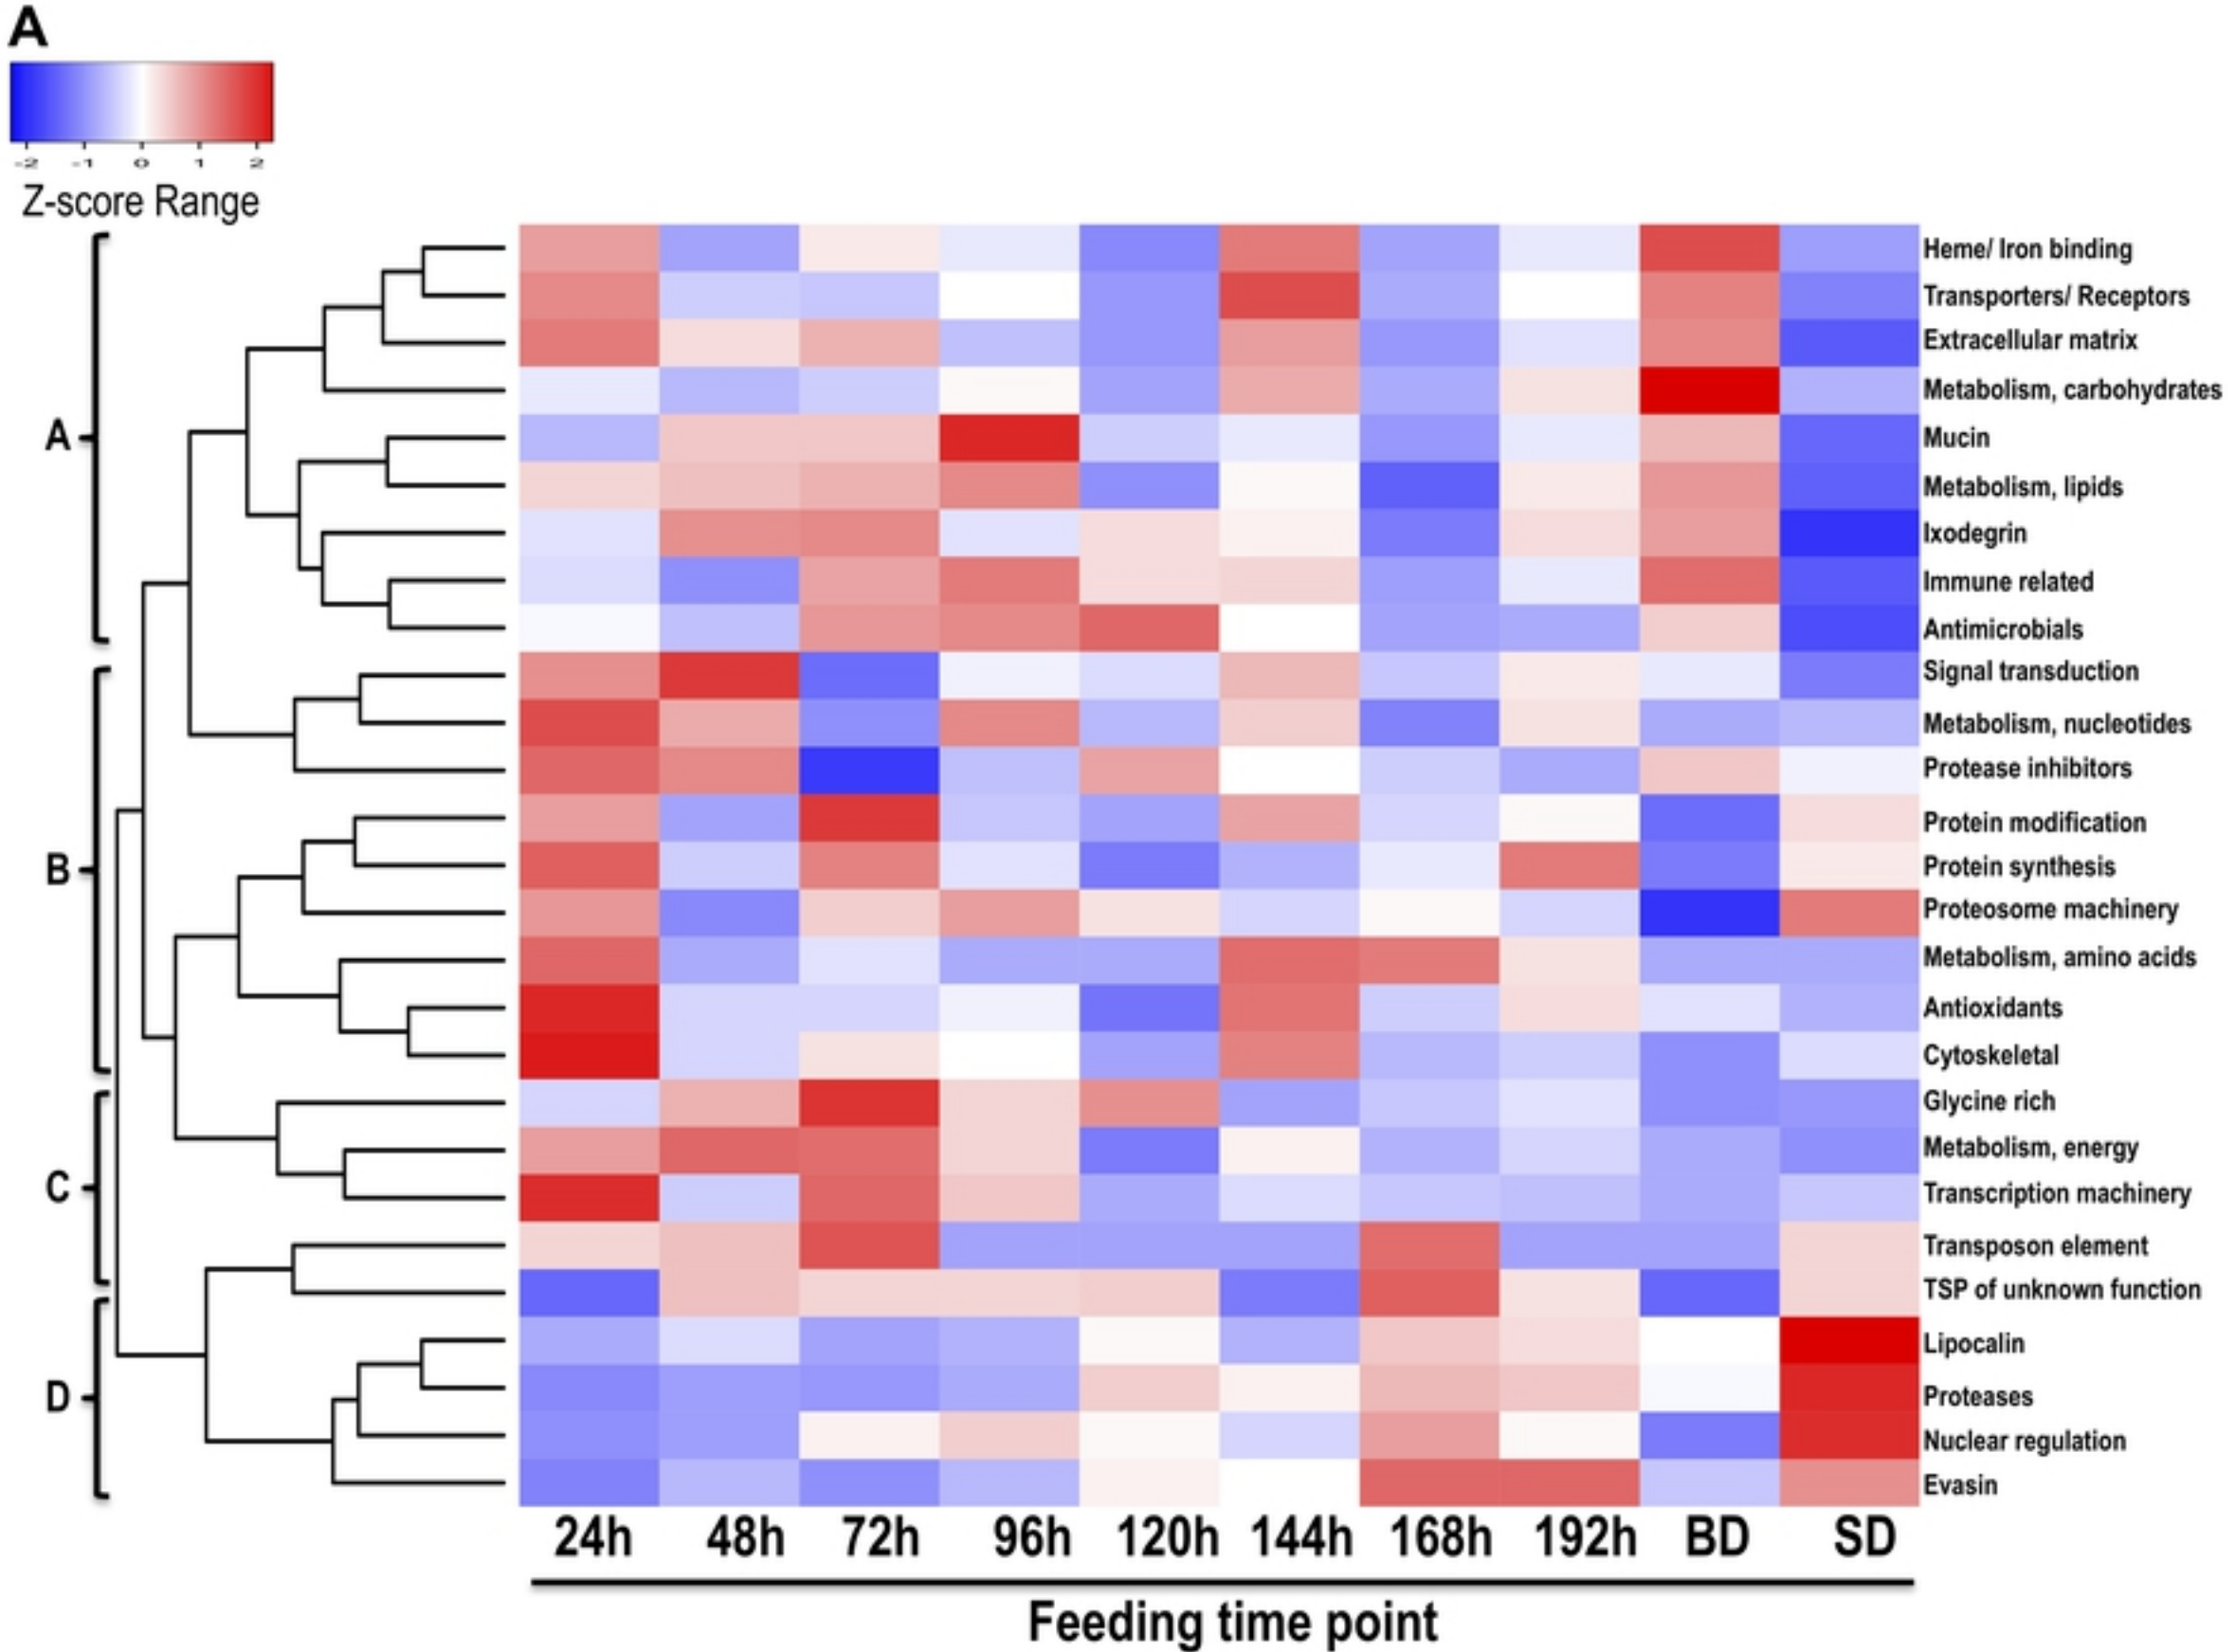

Figure 3A

**B**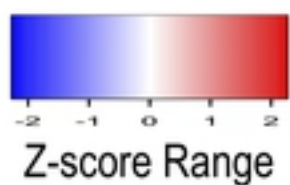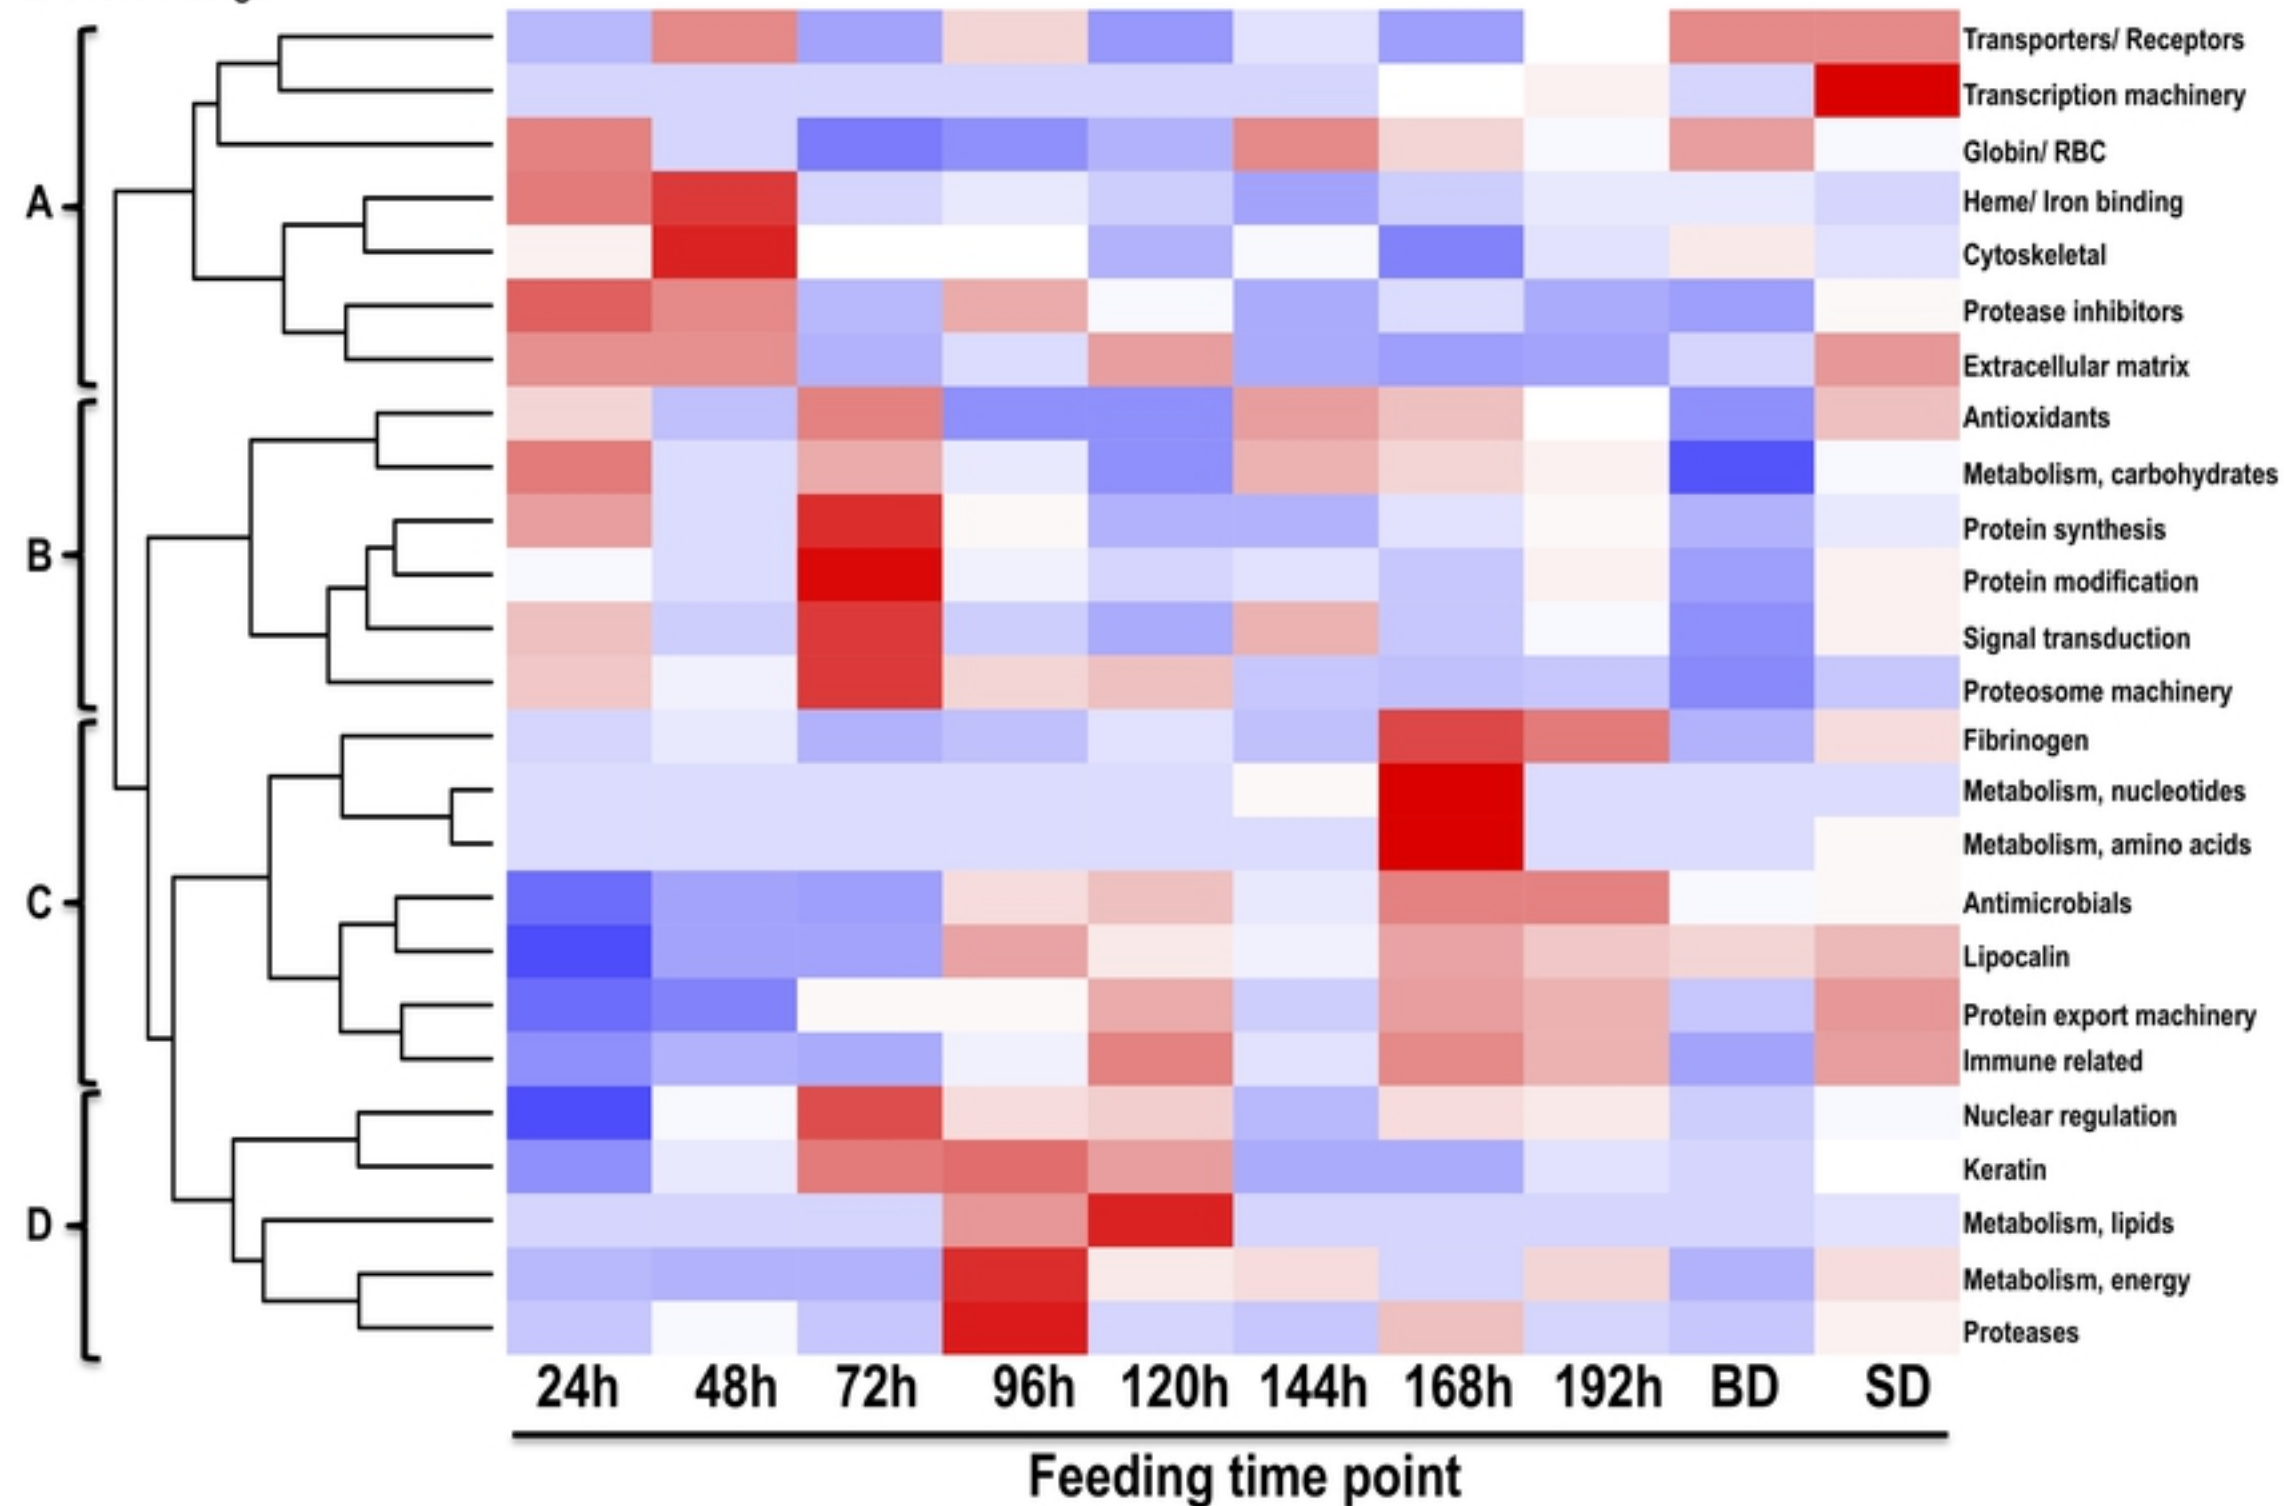

Figure 3B



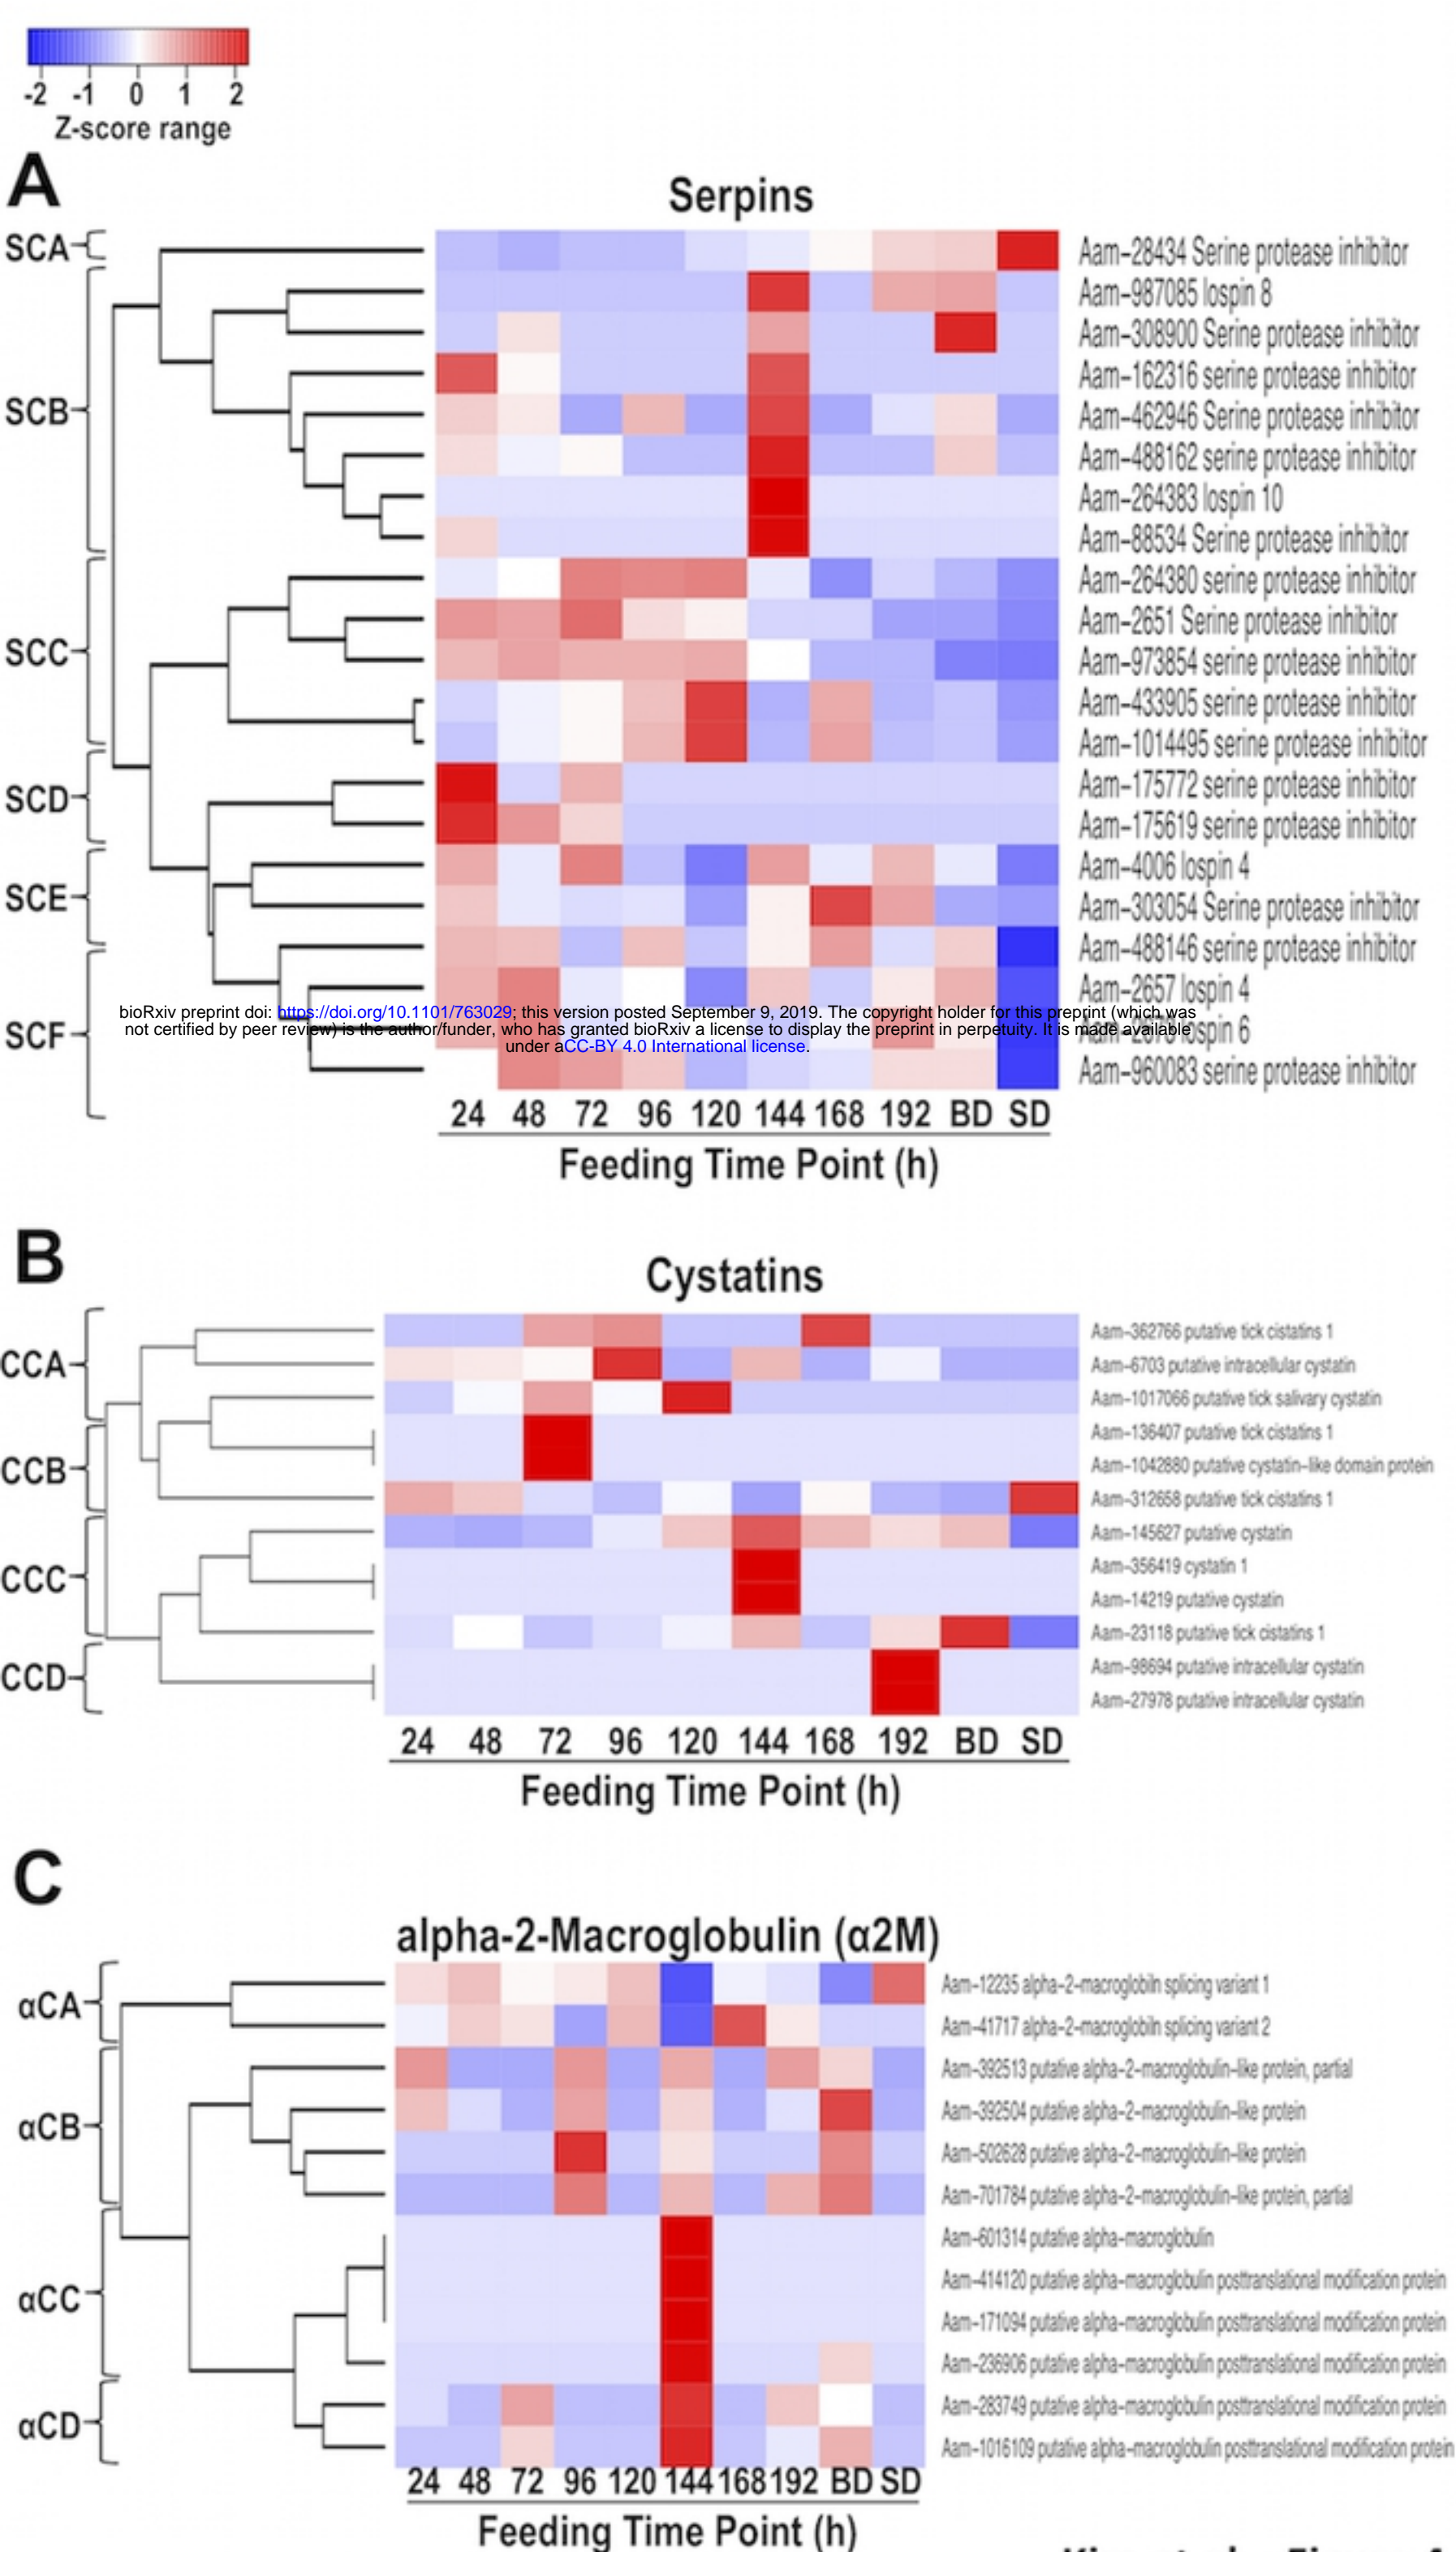

Source: https://www.biorxiv.org/content/10.1101/763029v1.full.pdf
